# Supplementary material for: Improving N-terminal protein annotation of Plasmodium species based on signal peptide prediction of orthologous proteins
Source: Malar J. 2012 Nov 15;11:375. doi: 10.1186/1475-2875-11-375 (PMC3529677; doi:10.1186/1475-2875-11-375)
Supplement: Additional file 3 — List of all reannotated proteins. Reannotated proteins identified by their Gene ID from each species are listed including their orthologous group number, signal peptide prediction before and after annotation, description of putative gene product and new sequence proposed. Species: Pb – Plasmodium berghei, Pf – Plasmodium falciparum, Pk – Plasmodium knowlesi, Pv – Plasmodium vivax, and Py – Plasmodium yoelii. [file 1475-2875-11-375-S3.xls]

## Sheet: Planilha1
Table S2 List of all reannotated proteins
PlasmoDB Gene ID	Species	Ortholog group	Signal Peptide prediction		Description by PlasmoDB (v7.1)	Seq. Description by blast2go (Blast Description Annotator)	Reannotated sequences
			Before	After
PBANKA_020370	Pb	OG4_11787	-	-	conserved Plasmodium membrane protein, unknown function	phosphatidate cytidylyltransferase family protein	MINILLVCLLSITNIQKNNFISYQYTYIWLFLTILCNAIIVVNLYYENGVKGKYEKWKNNDFFPFISCSLTIGKYYKGEALSSWSNIIKNKKNDKFYNFPKKTKLLIDFLKLFVCTYVENFFSFFFLPFLSTLLFLKYGIFRYEIAKLSLIFVNLFAISSVCLRYVQINILSYILCHISLFAVTLAIIKVKENVFICFLLFMVIFTFYHILLIAIFCLANKVFSFMNGVLISTIGAIFLTISLYSLTYDYLNIKVFPGPFFLILSKLILSTALYGGYCAYFIQNGDEKKQNKRKIIISTFFFFFYNIYNFFFKEYNIGNINGRKFVDYAMSLIRMNDNFILIASWFFITILYLIFINFLTKKRANLIYVRKHYHFLLFLNTNLAFWAGKVELLTIVLSF…
PBANKA_040570	Pb	OG4_10640	+	+	ATP-dependent Clp protease, putative	atp-dependent clp proteolytic subunit	MIYLILFIFLILIKNNAIEAKQNLKKPNILTFINFSNTNLLEKQKKRIKEKFNTQNNKWNLLTNDEILNKNIGVNEINDVKNFSGNLDKTKVNINNVTKIYQEEKSKVRQNVMEKMVEKILKKKKYKKLEKLLCCNNSIKDMKKNIKLYFFKKRIIYLTDEINKKTSDELIKQLLYLDNINHNDIKIYINSPGGSINEGLAILDIFNYIKSDIQTISFGLVASMASVILASGKKGKRKSFPNCRIMIHQPLGNAYGHPHDIEIQTKEILYLKKLLYYYLSKFTNKNEETIEKHSDRDYYMNAYEAKEYGIVDEVVETKLTHPYFIGLIKN
PBANKA_041160	Pb	OG4_42822	-	-	conserved Plasmodium protein, unknown function	hypothetical protein [Plasmodium berghei strain ANKA]	MNKRKKIIYAFSIIGSGYYLYKTGCNNNEFESIRNNSDIEKLKILNINNICSHVPLLILNIYDNYIYKNKILKKIYFKYKKKLNKKNYNDIKNILDQNDTKINYDFIYNEKSIFNKLYIYELILEKSIKYAILSPQLSIHILKELSSYFVNLNTKLYNEKDFSIHTKIGKNKRQNIIKSIFNWFSNYRHSDNNKMIYYSGEVNSKNIKKNKKKYRETYEDIIKTGNVYEKYNIHKFEDAYKMEEIRNNGHDVVTLNFLYLINKIYDNINRVCLNTNTNIYVHFYVINILKYICYKHYKTILKNHAHLEDLINGTKKKSVYDYIYTFFFKNNTTKNNDIKDSNQSLFGFESENYLSNLKKQINNKLTHFTNNESCFMNEHTLTGKGEQKDEIKQVISNNF…
PBANKA_051030	Pb	OG4_54914	+	-	conserved Plasmodium protein, unknown function	conserved plasmodium protein	MQSEILKENDMNKIILNLMETKKKEVLPSQKNNKKQNLNKNDIKSTIEVFFKEQEQIYKAEESHTMKYLETEIRDKEKELNEYYTYCQNYKKVYKNNFNNIVKQTEEIKKELKDMHIEYIDSKILLENKRKIELEGMLNFYKDKLLNIKNQWENKTFCDENIKNIVYDILGVID
PBANKA_051570	Pb	OG4_48144	-	+	conserved Plasmodium protein, unknown function	conserved plasmodium protein	MFLIVLQPFSNLLHFFLLFLFPLSLKAEHLSMDEIKNVMKNYILNDSTIFSHFSFLYLYNILRCTLTQNVFDSYPDKNYEKEILIVKEKLLYLNQNPQNTSQWDFVDFNLPQLLLSSIEEIEKNMKTQGINFIEMYNKLKTLNLKFRNISSLTLEVCYDSIFFIEEFSMQLTILPFILDKLDISDQKYRDEVKYMLKKSFKYFSFFISIINEYNSKIVDIYKKEINVFIKVKENFNINSLNENNLLSLYDEIYLKNKYGEKLIHNLFVLFKKISFLESGNDIYYFNYIDIVPIYIKTIKGLYKSRKYNMEKNYYTKIENKYKNNLKINEGIIMIKIVKQYIIDEYTNNPTYFDSNNIYKTIMQEIYKPIINDTDTRFRLLYSENVDKTKEKRFINDDVA…
PBANKA_052240	Pb	OG4_10235	-	-	steroid dehydrogenase, putative	steroid dehydrogenase kik-i	MITYLGRRALNPIYYIGLVVVLKNALFGIYWLLNYLKTKLFLNDLKNYGNTIVITGCTDGIGKSLAYSLARHNVNLLLISRNEKELKNIKNDLLEINKNCQTTIDYIVFDYNEHKFSSYKSIQEKLQKIDVGILINNVGISYPNPLYFHEMETELIEQLVNVNLMSAYFMTRLVLPTMIKKRKGLILYTSSGVTSLQTSPLYTVYASVKDGVCSFANSLSAELKEYNIQVQCHTPMFITTKLSKIKKSSLFVPTPEIYSECIIRKMKEGNILPYNVISSPYFFHKIQIFFYNCFPKWLFSIVSLASLKIVRQKALKKMKKEE
PBANKA_060240	Pb	OG4_48179	+	-	transporter, putative	hypothetical protein [Plasmodium yoelii yoelii 17XNL]	MNNSCMHTYEESYTCYVKLKDEKLKEMTSVSTVIFWYFCFFVYVWYINIVCVYPLKFDGSHFVIYYFIQGCGSLLLGLFSDIYGKRKCLNISFLFLIASFSTILLTISSSDFLFINNIKDFNNRKYDLYSNQNVFAQDDSANNLMSFFNLKEGNNFFDQGNQNDNFNGNIYKVLNSHNTNIQDNNNYMSKSEHENISYMANPYSNGNHDQNYLNEKPKSPNNDNNNIETVHIRGDNTKDVENLTAEHSNQHTNSINKNIKIKIKLNNNFQNLHEQLIKKVLNDIKKKNSELLNKKHLNNIIQLCVKTNLKKYIMDMKNYNIGMAKNIRRKKSVITNNNSDNNNNYFRNYPNNENIDIYMNNNYDHIVNKCVDGIISMYSDGKDANYATGQNDDLYFSHK…
PBANKA_061730	Pb	OG4_27876	-	+	conserved Plasmodium protein, unknown function	hypothetical protein [Plasmodium berghei strain ANKA]	MNRIIVWIILGIVILYIIEKGNFECSCFFIDNKHYVNNKTKLHKIYVSKPAQKKSNQLKTKIIINKRKKEENERNKAYKNEFKSSSKYKIIEELIEDYPIKLPLLYNIEKEPFMILKDKIKKEFLKGYELPFNFIHPVKYELLKIIGKISDPFKPICSHSLTPKLFISKLFGNAPEITYADFCYKLEYKFKFYMPSYTQIFKFEKELLWKQWVEIRELKEVSPVTSPENHDRIYKILENDETTLPITIRRVNKEINSQGIHPSILRMFFDFLNIAKSGNIIITNENSDLFTKISKNNKYNDENDDILKRSYAFLKLESIKNEIKNRDYLEGIRPDYLYIILNKKAEEYYNNFNEKEYDKAYKEAVNYNKMRQNMISENSEYKKQRKLFSEQTKKSLMKF…
PBANKA_081520	Pb	OG4_19700	-	+	phospholipid or glycerol acyltransferase, putative	phospholipid or glycerol	MMKRLEYHMISHILFGFHLRLFLNTVYNKKWEWDKYHIYFCILITYILLIVLYALNVYFLLHKLDLKKYPAEQIETYKTYKNTKNVHPYAAFERPDLVNMNIYKLIYGAIFVAPWKSIILIFMAIANLLTCLFFSIFNNKENENEEDSTIVKIYLIILKVVCTFLLWVMGVNRIESHYLCDNEWPKNIVSNHTSALDPIYFIRKHACSFVAKKSLRKDFFIGLSIRVLKCVFVHREKPEDRKIALNSIRERQLAINKKKSNYPSFVIFSEGTTTNGKQIVEQKKGAFYSLLPVTPVLLIFQYDFLNPSYDVIPYDWWVILMICNYQSIGLKAYWLPAVYPPSKEKYPNLTTEERIDMFHDEVSKIMFQNMKKYNPKAPQDIDDYNDWPGSLRIKYDFFG…
PBANKA_083370	Pb	OG4_28703	+	-	conserved Plasmodium protein, unknown function	hypothetical protein [Plasmodium chabaudi chabaudi]	MNRQGKYDIFPPPLEKINNNNNNNNKTEVPKTCPERKKKYIKTENTEYPFLVNDERSNIKHQSENKCFNKNDMVNINEKINKADPNILNKYNNLILNTNEINLIINDNANFKELLSNKQVSNFMNEYLATPLEAIAKYKNDKTVINFLEILFKYMNAKQKHIHLNNISETFTFGMK
PBANKA_091450	Pb	OG4_21637	+	+	conserved Plasmodium protein, unknown function	conserved plasmodium protein	MKITNLVVLYIQFFFFCKSDDIPFQSSENLLNKSLMYVIHNNFNVNGIMKIIEKMFKNNMDDIEMEDNGDIQNLKIKEYNIDSNKYKLTYFSFKEYCLNEVENGKDCMNYMEKDVTQIANKIDSKFYSKHFKEINLLKHNLNELANLLKWLNELNNEIFYFFENVIDSKNIINNMMTSKSRRALPFINHFEEMVYNLKNADNSFSFHNMIMQFGDELNIIIKNALVEYVYLHKQAKEHMKQLEKYMEKNVKVLTKMHKKIFLSIFYITSDINKTNDKIDFLINKNLNEFKEWVIHENKKCTDNLKKIKSNIDFNFENINEVFDNSKEKLKNDYISFIDISKYLSFQNPNKTILSIIHFLNNKYSDDVDIIFLYNEEYVEFNINDITYENDTSKNNDKSE…
PBANKA_093140	Pb	OG4_10290	+	-	oligosaccharyl transferase STT3 subunit, putative	oligosacharyl transferase stt3 subunit	MNEIYRNGPVVGSIEVTPNFYNYVDGVYYDKGFPHAKKCTMMKNNKRINHIFEVLILLLVVVLSFIIRLFSVIRNESIIHEYDPYFNYKLSNFLKENGFYSFWNYFDDMSWFPLGRATGQTLFPGLMITTYLIHKICYSIGFLIDMKIICIYIGPVFSVFTCILTYYLTKEVYNKKGCSSGGAALIAALFVSISPSHISRTVAGSYDNESISIFLLILCVYNWIKCLKEGTLFSVVLCSLSTYCMGLSWGAYIFIINSISLFMLAIIILKKYNIKHCIIYNVYYILTTILFLNVPCINKSIFTSIEHLAMHGIYLISILLLFCNFITNIFNLDEEKIKNIFIKICFIICFLIFKFLIFTDKLSWNHRSRTLLDPTYASKHNPIVASISEHQPTTWGSYY…
PBANKA_093490	Pb	OG4_38504	+	-	conserved Plasmodium protein, unknown function	conserved plasmodium protein	MSNTIHEENIFHVLFPKCMENHLELLNNRENSDNDEKLNSLNFIHEKLIDFFNKCNDDVKKRFCAFFHHYLFRSLNIWINDEFDECRIFALNIYFLIENNLNDILLNEILFKNIENDKNSFLLICVNRLKEDENKKIVEEKEEIRLKILQFLKLIINRYKNYQTNKDMLNIYIYIQDILIALSLLINDPFPLIKKTSFEILSELNFEEPQKGLAPLYRNILKKSLANLSVRNHEIQELAIKCIKRFMSFECNRDILNEATKCLKKVFVKKYVNVLFEVVDCIEVWNLKIKNLNNIEIAKLIFIILLCMHSNISLSLNKRCYEVLVSISKSKELVILEGNEKEDIDNHLKNLKNEKDEEYEYINSTNNDYDNKKIKKKYLYYEDTNVDIYEYYFQSINKF…
PBANKA_103680	Pb	OG4_34342	-	+	DNA mismatch repair protein, putative	dna mismatch repair	MKYRVVKSCICIFLIFLMSAKNTMGLKKKLMFTCLNKRRLISMNIKKKGIIYLNKKFINSLIYTKEDEIYKINDLKESYKLRDDDIWEEKDKYISKEHTNNIISNSLCNKLSDLENIKCGNEEDNISCSSNLSNGFTPSDYELRLYKNKYMIPIYWIKKLEKLKNINAINCIEYLKGDNLLYFDHYKNKGLLKFLNDEKKKYSNCIILSRVGDFYETYGLDSIFLIEFLNIKKMNNKLSCGFIKSSINKALSILTNNNLNVCIYEEINEQSFKAKKRYLSQIVTPEMPIYLNNIQYCFENDKNKDGINEDNTNNSFPNYDDLDIKEIVCIYIEGKNILSLSKINLSLKTISIYDNITFDVLNVYLKNTNFLKAYIHQHNNTTFTKKITELFKIENYYLF…
PBANKA_110620	Pb	OG4_13519	-	+	histone deacetylase, putative	histone deacetylase family protein	MYLFYFVISFMLFEFVWITLELKQKYSNKRITEINSFINVIVGEQTKKNYNSRICQNVENNKIENLIDLHTEKLAHKCMKNEINKKYYPLCNKRNEEMDEQIWDYPNDVSCDNEFLFLDIQKEIFKICENSFNEKLYENIFKNQKKYCNNSKNPPYVFHPIYSNAERKVKYSNRHTHRFKINKYENIFNYLNKRGECIYENNYIIPSCDVSKIKKSLFTIHSTDFINKMFNIIKNNEEINLYELNLFSDLIVRYLIEINGTVLSSLMALKHSMCMHIGGGNHHSKRDKGDGFCIFNDIAIAVDFLLFYKIVKSVIILDVDVHQGDGTAEIFQNHKNVKTISLHCKDNYPFLKKKSTIDIELNPYMEDNEYLKIYQNLLNNIKPQKHSIIFYLAGVDISK…
PBANKA_123370	Pb	OG4_37939	+	-	conserved Plasmodium protein, unknown function	hypothetical protein [Plasmodium berghei strain ANKA]	MEDQDMLSRELSSNGSIKFNFKSLSHISSNISVTKNPNDTEDALLTQTKMQTPETSHGSFDINEDKEISYKRFIQNARDEYSVQQMEKFLKHGIADNGMRMMTTKTSSWLYDYYKTTKTPIPCDIKELTPNTTIDYYYYTTPFHTQIGDINLTMMHSQVNFEDGTCTPADRVFKMHKVTPEMSKQALIKSLKYKYESMS
PBANKA_131070	Pb	OG4_16178	+	-	conserved Plasmodium protein, unknown function	glutamine cyclotransferase	MANKLVARKKIATYIIRENSLVKKKRSIKRVVILVIIICMLIAATILLILHFVLNGNSGYPIDIGIYSYEIINKYDHVHDPIIGQQANVDSIVHQRYISNYPFTQGLLYLDGNTLIESSGLYAVSYLRKFKLNTGDTERYYNLTNNYFAEGIALVIEPETYRKFIFVLTYKENTILAFDYNTFELYNTFEHDLNGYGLTSNLDPIHSVEDLKNGKFANYQKLWTTSGNEFLYELEIPHNFKKTNKISIINKRKVTCAGFTIKHINELEYHLQEKTIYANIFMTNLVIEIDISKGTCLKIINLSGLIDQSTNKQNMERNRESFLNGIAINPVNNKESIPNLLVTGKFWPNLFEIKLVKTNGLNPNSVLIEYFKTIRHRH
PBANKA_131300	Pb	OG4_11162	+	-	transcription factor IIIb subunit, putative	transcription factor iiib	MCYSPQQSLSLVCKNCQSSDIETNEGQGEIICLRCGSVLEENKIVESLEFVENNNGAISMVGQFIPSSGTKSFMLSWGIRESREISLQKGYINIQKIADNLHLSTQHIEAAQRIYLMALQRNFTMGRNNSYVAASCLYTICRREKSPIMLIDFSDILQTPVKPLGKTFLKLLRLLHISVPNIDPSLFLERFAYKLNLKNDIYKVTYTGIKLIQAMTRDWISTGRRPTGLCGASLLIATRIHGININSNTIAEVVRISNPTIIKRLYEFKNTNIAKIKASEFDKISIDDIPSSSIPPCVISDNKKKIKYNLLQKSKTLSLCGSEEQYALCSNSTCSVENYEKNTDLQNGNICSYSDNNSTKCIRDQELDQSKFFNSTQNSIINSSNEVEYCNSTITASSS…
PBANKA_146240	Pb	OG4_11463	+	+	cutA, putative	divalent cation tolerance	MRATIYIFYIMFFLQSVLTKERSNKLLFYSFFINNIFKHNSPNNIYIFKKKYKTFSTNNSINKMWDNKNPFIAVYVTTPSKEIAESISNILLNEKLASCINIIPGVLSLYHWKGEIAKDNEFLMMIKTKKHLFGQIVKTVKSNHPYEVPEVISVPIHQGSNDYLNWISDSVKPDEIDGKK
MAL13P1.410	Pf	OG4_48438	+	-	conserved Plasmodium protein, unknown function	conserved Plasmodium protein, unknown function [Plasmodium falciparum 3D7]	MNFVKTYYKNCMDACTPAKYSIDQNEINLADISTRLNLKIFDFYNSTPSNISMMDLYENNEDDKKGIKQKTKNKTKLTKKKNKRKNDCTHIDNFKILDNVFLTHVSETCNMNKKNHRNNQTNLDKENKEYYKKKGDIYIENAFPNILSNKIYDGTVNISYKDYNKMKETSKNKYTILLKEPTRDQNIISYKFKQEDKIKEGKKKGKMKKISNKKSRKKKEANMLYENVNVLKIGKNNSYEDTYALNSPNANIIPSSKIYIPRINLSRFN
MAL13P1.78	Pf	OG4_27854	+	-	conserved Plasmodium protein, unknown function	conserved Plasmodium protein, unknown function [Plasmodium falciparum 3D7]	MYLFLTKRCFFLVHNNIYRKIFLSTDFLKKVISIKCRSYSSLKSIYEYDYRAEEKLPYDGLIKNVSDKKQSLLLSDYIKFDDDKKLKHILFTNNIEDLIHHFEKNLNELKSHEYIFLLFKIYEIIFYNFYCYYEDSEILKLENPNFIYNTFTEYMNKNLKDYSDKIKSLDDEFNDEIPFENIQKFNDEKSEHTIEMNRERDDIYDINNNKNDSKENNNINSRCITNNTKYNENIIMNTSYHSDKNILESIYNNVVNKKERDNDKTYKFIDKNKVINNVNDIENNNPDIYVNSANCPDTKENNTNEDNHMINIDINKYNIKILIKIYYDYITYIEDLNIKEKCWKEYVSSFFLKNKKYENLYCSILNTVYKKIYFFPCIDIINFWYIIKRINIYSIKDLS…
MAL7P1.20	Pf	OG4_13472	-	+	peptide chain release factor, putative	peptide chain release factor 2	MNLKYNLFLTLSIFFLELLIMSIFVECRKNIRGLNKCLFLYKGVRNIRNRYNLCSYVNKDVENYSRYFKNSCSLILSSGTGGTEACDFCNMLYNMYIKYLCRIKNRKNIKYEVIDISKNEVGIKKVEIKIDGEYSFYNFVSEKGIHRLVRNSPFNAQNKKMTSFVKVDVIPTLNFNDLNVINFLNTAEGVGSSSSSKLTKESSDKKQNKNKHKQLKESDNNNNNMNNSYNGGNNKMNDFVINKSDLVIQTMRSGGKGGQNVNKVETAVRILHKPTNISVKASSERTQLLNKRNALKRIYEKLLYLQTEALKNKKYELANKSLTHFGEQIRNYVLYGNKMIKDTRTNVFSTDIDKVLYQGEIDIFIDAYQKNL
MAL7P1.32	Pf	OG4_33237	+	-	nucleotide excision repair protein, putative	nucleotide excision repair	MIHSDDSQNDEEKVSYNNILFENNTSDEIDYFDDRLPHINFYLKFQKKDFVQNFFDKVTREQNAEKDIETLTNPYDIHEIDNEYKYEDTNMNNNINNNEGGFLLDNDEDDNNNLYIINNNNNNNNIHRDHLYLDIKDDIFHLDDQEEYTKKINENFQKNKNEFIFSIERVIENEEENIKSDKCFLCNKKKKNYNETLVHINIYLCKECKALDNNFRMISLTKLIKKYSLNTYDLSKYEKQLALLSTKNPRGYMKQMKLYFIFQIKEIALRKHGSLLTVKNLYNNKLLNINSSSSTNKINKTSKLIHKFKKTKTIYSKDVRNMEKLKIICEDNEHDFDTPVCINQNDNTYNKKCKKCSYCVEYMQF
MAL8P1.105	Pf	OG4_34484	-	+	conserved protein, unknown function	conserved protein, unknown function [Plasmodium falciparum 3D7]	MYNYKLLFHAFIYGILSFIKICYGNYASYSNNTYLIGHVNNIIPIPNKLDNLILLSSYDGVVGLLNYKTGKLELAKYHREYESVKKLYGDDKYAAALIYKNNYGSDLSEDNIVEEEDMYNYINVYDINNFYLLSSFEYNNKEIINDFIIKGQNIYILLKDKIDIGNINDNSVISISFKELKLDLIYIKIINVKDDKIINLFYVDVNKNSYIGSLNILTKKLNKIKKINQLHLTNNTTTTTNNNNNNNNNNNYNYYNSSIYNNNVVIIYNYDYLYWIELLNDENEYYYNYISIKDKMDKSKISKANNINKNFITNDYLENCHVGKYICISKEDNVLIYNYDNKKMNFVEKKNQKNQVIGYYLNKENEKVMIIGEDTNKNILIKKINNDKKNILLQELKKS…
MAL8P1.37	Pf	OG4_11044	-	+	lipoate-protein ligase, putative	lipoate-protein ligase b	MNKINLLVLISLTFIILLNPKMKVGKLKKRKNSGLLYPYFKNKSFRLNRYIFIKPIKSVKLNYKKKKMNLTHEICILNCSEKLIDYKLAFQLQNILHHSKIIMKNKNEVQISNHLELKKFKNFKENMEKYDFCFILQHTPCYTLGSVANCSDILLDKENYYIEELGDIYNNLYSNEIIHLMNKCETIQDKINQSDIYNENTNYFNNFLKHCRQRKIPIYRVNRGGKATYHGPGQLVLYFIFNLKNYPSNYNERIINKHYKYTNKENFPSKTSEYEKNNIYTNSNSKENISSIERTFDLRTTINNFQKIGMETLQKFNIKTHCKKDTIGIFYKDKKIISIGLKITKYISMHGLSLNFNLDNNFLKYLLSCGMNHNDYISMHEINEMKKKNYIYQKGKIAS…
MAL8P1.86	Pf	OG4_84662	+	+	selenoprotein	sel3 protein	MILKKVYILIILILLNEDDDYLAKLIGVFNDICTYSINNKEKIAKILSTSAVSVYTITSLYNSGITFKKNPHYSFFLPSQKYILKIINNNVNIQNNDIKKIDNLKDIPIFERTFTNKHNIQMSKTYILNNFINFINFLPYKLKKESLYNFSKYKEFDGLKYVENPFTQVQVLNHEDNIIVYQAKTKKHYWIHLPFKYNIIKISDDNTTSYILMFIPLYKYYSNYIIQMKITSNNNNQNVTFSSCIKQEKTEHIQNNSFHYDIIKNISKHITYDIINAIDNNINILYMRNVKPGKYNFINTTNALQKKTKNYKKKKFTLPSFKSLPFKFKRT
PF07_0016	Pf	OG4_46890	-	+	conserved Plasmodium membrane protein, unknown function	myomodulin neuropeptides 1-like	MEKNKYDIEVSENNRFLFNKQRDWPRITFTFLVFVLGIKTVLCILLYMYNNILLFVVFLILCVVSFYGLIVNTIKSLVLYILILSLVLTSISLSFYNIIYIEYISKVFEHAFLSTVLYSTFPLLVMELFVSIAYTCLKKKKKGYIEKQLKELKIAIDNTNEEKDKKNEGKLLSLQIDLEKNQLNTCNKEYKYYLTHYKNKKYICIEKKTDYSSEDEIYAKYIQDKSSDNSYQGYDKSKLINTSNINMLNVKTNKKNVNHSMSSNTIQQDLSFIHSSINKYEKKKEKENKNYDKNKKSSNTNDKSYNITQNDPRKNNQNKEFVDNNNKRNDHNKNNELEQVYYNNPNVHQNNYQLSKNKMNTTELQHDNLFNKINPLSSDNTSSIILNSNNMNKSINKDT…
PF08_0112	Pf	OG4_30703	-	+	conserved Plasmodium protein, unknown function	conserved Plasmodium protein, unknown function [Plasmodium falciparum 3D7]	MRQGLCKRLVLLVSLNILIFIMVNYNFCSFGFIINRNEVMKGSSIIIDNMKKKQSREKRKNIGFVNCFILRNNKIRWGKKEENNKKINIKRIFLFDRSVDKVSGHFLQDRGLFIEADKKMKIIEEIEKMTKLEYKNVEKYLNVLSENDVYEEVINHKFYMYKKNNEKEKHDRLIKIQEFLNPFIINLRKKKAKEKVEYLIACIIKGVNIDEVITEMFKRKMIDIYVLTFIDDKIMEAHTKLLKDDKLNNKDEQMSISEKILRTLKDRIIAQQKLNKKGTFVFTRLLFLSSTLDINEDRKSMIKSMINTIEQLEEFELYLLDALEYAHENDKLQKYIPHMELLLNACKQVNPVYNQTLNKQSENIGFFPESVDPSNLKNF
PF10_0063a	Pf	OG4_64945	-	+	conserved Plasmodium protein, unknown function	conserved plasmodium fragment	MNNHMGVLFLFILFLYKTYDIYKNKKEPYPFFVTSMIREEKNMDIDLSYKNDKNKIKFVLQGINHKDEYDSSLIILLPVEENYVDKLYEEYLKKAGDNPQHNSVKNVLKNILNRYDVIDQKIFLNKFSEEINAYLNLYQNISI
PF10_0093	Pf	OG4_11144	-	+	protein phosphatase, putative	protein phosphatase	MIYTRVYCIFIILLLNNMLITHNRECSKSVQGLVVEKFNKKMNYLLKKEDFYIYRQNFNFFPKELEVQLRKKKNKIQNETGVIDGVIDRISSISTQQNKGDNTNVDERYINVDNSNKIKGNNMNNMNNMNNVNNVNNMNNMNNMNNMNNMNNMNNMNNMNNMNNMNNMNNMNNHYNKDNNKNVGKNRCNNGKKSYTTTNDHKLGIKTTYAFIKNSIPFNFFHMVNNIYVTNKFKTNQWNNQIIYRSKPQQYEFNFPYQLGSNAVSKPNDADIAHIEVKKNDIIVVGTDGLWDNLYDSQILTIVKENNFATLSEKIANEAFSYSKMKRWMSPFIKSYNKEFKCHKTGGKMDDITVSCAMVC
PF10_0157	Pf	OG4_54951	+	-	conserved Plasmodium protein, unknown function	conserved plasmodium protein	MENNICVYDCKDHSLKKMKKKKKKKMRNIYKLLIVLSICIIYYFNLNFFSVSAKNINKEKINPHGIITSSVPNDNINIIEANEKEHNRNYTTEELLNNNEEIKNEELSHSSDDKEYDKDIYKEKFLGDDFVSNVELIKNSKFIINAVNFLIKGYKQSYTTGEKEHTSLRNGNDNPNAAEIKKLIIIKLLKCIGVLILCYIAIRLVFSFFKKVINLIFTIIFKIFKFCCCGGK
PF14_0114	Pf	OG4_10336	-	+	GTP binding protein, putative	gtp-binding protein obg	MISFIFFIFTIYYESIVGSVLFSRWRVGKRIMFLNNMKGTKFKRRKRENSRSTLYSMQKMIKKNEFHDRCVIKVKAGNGGDGICCFTVFSQKKNKKYASGGRGGNGGDIYVIGNKKIDNFLNVKLKSFYNAENGGKGLNNNQVGYNGKDEYIYVPINTIIYNEQKEFINFIYMNNQKVLIAKGGKGGKGNYSYRTKSLKIPFVCQYGEKTKEKKIYLKKILFTDLGIIGYPNVGKSTLLNKITKANVKIANYSYTSKFPNVGMFKRVEDDSDIRKDNEFISFDGTPSEETIPEIGYSEEDTMVEKYNKDDKLENMNNENDSLLNNNNDNNNDNNNDNYDNNNDNNNDNYDNNNNNNNNNNNNNNCSDIMYNNNNMDDYNLLDDHDQYNFIEDIYNDNIP…
PF14_0517	Pf	OG4_10729	-	+	aminopeptidase P	peptidase m24 family protein	MQLNFLLFVFIFLMVFHLNIFNKGKRQNLVSAYLNHFKKSYFSGVTSGSDCVNKSEVSSDNNNNNNNNNNKIAHNFFSKKYQRNFENNNLSENQENNKNIIYSGSNIFKNIYNTEMMSNNNTVDVNMMDNNPAARLEELRTIMKKNKIDVYILINSDEHNSEIINEKDKKIVKITNYSGADGILIVTKDKPILYVNALYELQAMNELDQNLFTLRISRIDNRDEIFETISSLEFNTIAFDGKNTSVVFYEKLRKALLNAYPKKKIVEKIIYNNNFDDVNKKDDENVLNFLVLEKSLVEIKDYPVNNKTLYIHDRKYNGACAGEKIDKLKQSLMYDIKNVDNLLLSELDEIAYLLNLRGYDYQYSPLFYSYLLFQFDREEQDFSKIVFFTTVKNLPADVK…
PF14_0625	Pf	OG4_30690	+	+	plasmepsin VIII	eukaryotic aspartyl	MNILFCLFVITNLYNIIAVKAFKENLRVSKYYAGGISTIVLKGGYINRQFIGEINIGNPPQTFKVLFDTGSTNLWIPSKNCFTRACYNKRKYDHKISKNYKLVKKKDPVEILFGTGEIHIAYVTDDIHLGDIKVKNQEFGLASYISDDPFSDMQFDGLFGLGISDDKKKKQLIYDSIPKNILEKNMFAIYYPKNVDDDGAITFGGYDKKFIRENSSIEWFDVTSSKYWAIQMKGLKINDVFLDVCSKNHEGFCQAVIDTGTSSIAGPKEDLILLSRLLNPGKFCQKRILLKNFSFIFIDDKRREREYELTPKDYIVNSFRIDPVLRSPCNFAFMPINISSSNGYLYILGQIFLQKYYAIFEKDNMKIGLAKSI
PFA0230c	Pf	OG4_19585	-	+	conserved Plasmodium protein, unknown function	flagellar associated protein	MVSIFSLLTYIIYLYFSLKSIDMCCIEHIDRSKNIIFFGIINKCLFLNNKRVFFLNKRRNIITYKKDIRLETLKMDDFCEVDLDEFCYKQFDEKNKSCSYIPYDKEKFVIKVNELIKERKIKVLPGYADFCKHIFIENFTEATVETMEINNKNRDLIKTDYISRRDNELPVLVRWLCKKDIKDQITKAKYLDLILYSKDQIDKENKEMKNKPKNISHCDYSIICIKAQNENYELPMTPITMLRNTLITEGGSGVHLNREKYLDSVKYWRHHVSIIDN
PFB0325c	Pf	OG4_48259	-	+	serine repeat antigen 8	papain-like cysteine prorease	MKMLGMKSYILFLLVTLYQLKRVHSNMLINCFGVLHCNICRTVLRNCFLSGTSDLQKCISCGEKYYKISPCTQNHESFLMSKIDMNNTFVELKDHMKNLITKIIEIAIDRHTLGLHDFSSVSDEYKEKIKMLCMFSNYKDNYENANNHRQAKVEIVEEHIHKIVESYINEENNMEHMKDLLKNPALCLKNPNQWVKDRAGFKDDDKPSVGIIPERKIFKPYDIKTLKSSLYASSTNCDRQFCDRFSDSNECEHRIRVLNQGKCGNCWVFASSVVIAAYRCRKGLGFAEPSIKYVTLCKNKHLMDIDNNPFGHYNDNICKEGGHLSYYLETLEKTRMLPTSHDVPYNEPITGSECPDNKETWSNIWKGVNLMDRIYAGYIYHGYFKVSFKDYVVSNRTND…
PFB0400w	Pf	OG4_42799	+	+	6-cysteine protein	transmission-blocking target antigen p230	MDKKRTFYYLFFFFTFLVYVLYFDNIKSVLRSSTKKKKKKKICKSTFYVHEESEEIKSWLRNSNERDKGKKFFIFERLIKERKYICVNKYKRNNKLKWIYKNTYEKTKNICDDYNILFKCIKGIIYDKNKETFFETFFENFWDNIFYMNKYIFNIYYYMFDYTKKVKKKIEGIKENMNIRHNNNYNNIFYVHKFFLFNDDEEKKKRNDDIKINIKLHNNTRKLSVSEENVELKPYIKQGERNETVVNLYEYFTGGVKRSNNNNEIVVTSTEQFHRIVIICFKPTVKHSHIITSPHDALNHIVEENDKIKLSEEIYSIPFYPIYGNLGLKNVITTGIVEFMIPYFSRTQMNFTVTCANGEMNDLYKFEDLIKIRIRIPRNTKKILGLSTNEKDKTVFERI…
PFD0215c	Pf	OG4_48311	-	+	6-cysteine protein	pf52 protein	MKRKKLFVYFIFLSFIINFNFNININFVCSNVIQDVISIGNVDICVVNVNSDEAQECILNNEFGKLLLFVCNMNDAFSTTAKTHPENCPSRAFVNQSNPTENSPEVDTYSIYPNLFGTNENRLNDTYSLYSTPYSNMDIDFSCLCYGDKQDKVKHIMRINIKKTRKKIKGCDFGDNIPSKRDLTNSLSLNERSSCIIHAYSNDVLGINCFKKEINNSYNNNLELNPSNCFHDVYFGADLILNSKNVIPNSRVIPDPSSDVKLSRNHSFSSYLILPNNLTENIKISCTCKRDEFVGTMIIYTKNINSLMFDNNNNNNDEEQIFQNKYMKKKEYKKDEGNEYDKKMNTDDNYINNEEHHNNNQYNNYENKINNVNYNYDDISKYINEHYKNYDHEKNSKNS…
PFE0875c	Pf	OG4_16348	+	-	conserved Plasmodium protein, unknown function	udp-sugar pyrophosphorylase	MQKLNTIMNTLGENKKYVDYLIRTEQFELLAHEGLNEKNIYDIINQIKEFELMYPDGFIKYIEKGREFLKRSQMNINEYYNYKIEKPDNLIKIKFHLTNDITFKKEDIKNNFLNMDNKLLYNNCYVNNNILYRNKTFNHILKRNKKKNTSYHHREILNNSHGVSSNESTPVSILSNNKKSNMYINKEYPTYVNGIRQINTHQNVKNGTYNEDKKIKYSEKGNVSDYKCGLGILNNNHQRSYEESTIFTLEQFLYYEKIGLDHIDKISFILLAGGLGERLKHKDIKIKLFTNLISEETYIEYYCNYIRCFEKYIKKEKKKKMNIPFIIMLSDDTYEKTLCFFEEKNYFGLEKNQVHFLKQNKVFCFKNNQAHLDFTYEKNTFIISKKPHGHGDIHYLINK…
PFF0660w	Pf	OG4_54908	-	-	conserved Plasmodium protein, unknown function	dynein heavy	MEDLFFITSKKKKLVSEKLLETTENEKDNQKEEYFCTRSKNKLIKNKNNLSSIETFTSYMSHPKRCALNSIESDEKENILSIDLNNVLDTYKKTNTDTTGSDKITVLINKEKSNNKNGHSNNKDGHSNNIYNDNIHYNNEPLLKNNELKGALKIEFPFSTPINNEKKNFIYSNNIFYKYYINNYEEEQNGVHTNNNYNLHSNNTTNYAHEINPTIHHTHMNNINNNSNNISANIAKDVLRAWYNEQENQNDSADSKNSNTEYIRIQKVYETNDNDMNPFFYANKDFKNNKYNHNKIDDQCVEKYNDNKINDQCVEKYNDNKIDDQCVDKYNDNKINDQCVDKYNDNKIDDQCVEKYNDNKINDQCVEKCLDNKSNINNEDYFENFIVNENNNFRDTIIC…
PFF0985c	Pf	OG4_48277	+	+	conserved Plasmodium protein, unknown function	conserved Plasmodium protein, unknown function [Plasmodium falciparum 3D7]	MNINILFILHLFIMIVYCSEIVDYEKIQKIVNEADGCSSDDVDYMNNYINKLYWIWTDNFFRYLRIKTYIYENEEIYESINNNIIINNSFNNISGLFNDNFIQYKQRDEYTRRALLILSNEQSLKKFIRKHVPKRKIKFFQKLSTEKLLKLLSDEKKNLINSYEKYKMFDQFRDVANSKYYYQKELLDSKSEIKTEDNIYPDKKNNPKDNNNNNNNNNNNNNNNNNNNNNNNSNNNNSNNNNSNNNNSNNNNNNNINNNYLVKNVLTLDINNIPVTKELYFDYYDNNKWNKYFYSDEDEDKLIT
PFI0800c	Pf	OG4_54802	-	+	conserved Plasmodium protein, unknown function	conserved Plasmodium protein, unknown function [Plasmodium falciparum 3D7]	MDPYKFNSWIRLLISLCSTGAYILISLMLPLFVAVPSFETTYGIFFVSPYNDSKYIKWHEFESHACKNENVALPQINYNASKGKEFTRNMRKQLCHSINFLKNYLLITFIVSIIDLIVVKGVLLYAHFREHPETFALKHVKFCNKLITLIICITITNCILLVAPVFFFNSYEEFGKTHYLHAGFYILLADFLTHFIIVIFLKRDKTILKYVCELELIPWDEKRKLPVHYAEFNDTLISPNEITNYLQGLFQQDNINEEQLKNFFGTDNYEQIYYVILNNLKNQKQMMNITPM
PFI0835c	Pf	OG4_11602	-	-	N-glycosylase/DNA lyase, putative	n-glycosylase dna	MNIYNHVLLIITLKNIYTCKYINKVIQNNISKFILYKEKKNISELNHNINKKYNFIIKKKNCNKIQERKKKRKRYIYSEKIKNGYPNFITLNFSYINNYNMIKKKNKVLSERLSNKMRNVKRIRDKVKLHSLNEENKMKNVYSNVTNNSPIIIKNYEKRWIKLDASTNDLKLKYCLLIGQEFCFNEVEKNMYIGLLNIKKIYLFKETEKDIFYQCLYDDDNDCDNYNDSNNNNVTCTGYSNKDDKNILKKRKSNNHHNEVYNFFNLHFPLNENIEIWKKKDQRMKEITNKITGLRILKTDPVESFFSFLCSTNNNIPRITLMIDSLRRRYGKFIATVVFKNGDIIIKRDDQNVDGNNMIKLKHQDDSNEHNEYSINIKGEIKNGEGKIKNGECKIKNGE…
PFI1585c	Pf	OG4_41738	-	+	mitochondrial ribosomal protein S6 precursor, putative	ribosomal protein s6	MCVFFKCIIFFFFFFFHVSIFFKRSKCHKIIRVVDMKEGIIRPRRYKSFFLFFQNVRGYKNADKNSVYVLENKKKYINKNKNGTRKNEIYGSLNDYIYKLLIRRFKRKKEKQELNIYKNVQSAKSSYNIDLLFSCNYLISDIKKKIAEYIYELKLIEAQNFKVVYLGKRKLVRPIKKLTEAYYILFSFEIYPSMIEEISNKLKLQDPILRFIITKNEKKSKSIAFEESEPVKNGVDKLEQSFFKKAS
PFL0265w	Pf	OG4_54826	-	+	conserved Plasmodium protein, unknown function	conserved plasmodium protein	MLLKYRCIILFLCIFRNNILVHSIKMNKIHIQWNDKMINSYNKTLLLNSLRKTKNNIFYATYIKTPFLHINQRKINYLKKDNHSIYSKYYNNEPVYNTYNPILNYDILDIIKVYGRLAEHSKYESLNINININEQDVQVKENNNLFTKIFSFLKSKSTNDYNKVYWFHHFLKCGKMNFNDFRNSLFKLKFKWPKDSIFPTYNIFLFEKGLNKNMDSPTIRKKVENYMQYQEINDNLLKSCFYCFSNGKEYITVYDILRTFNNWKKISKHKNNDKPKGLFSFFKKEHNEEDESVDWFTFKKKIDLSTIQMYESKK
PFL0623c-b	Pf	OG4_25537	-	-	conserved Plasmodium protein, unknown function	conserved plasmodium membrane protein	MAGQSEKKRLKKASTFIIYASAFFSIFSLVYIIFLFYFRYNLITKYIFGLHCLLFFCYYYCIKNYTDVLILSFCINIGLFFSFKFFYIYIIIPLYAAYQIISFIFKYFLSSPFGSAEPSKRMEKMEKKKNKVVYKTVY
PFL1045w	Pf	OG4_34378	+	+	conserved protein, unknown function	conserved protein	MFVRIKKLILSFSIYLIICSCVMNNKWFLFCRRIILQPNFNLCFLSYNTYRIPDIYNNYYNVIKKEKKKKRKNFSFFSKGCYNNCSKAQKLYGENEETTYGYTKYDKKDETYINILERKADEIKNSKNCFNNKIKTNKNEYAHKLQPLDYTTLHLLSIELNTLLSDSIVEHITQADDKTIVLHLTKRDKEYYLYICYDNANPVISLGLKIKKLFNRFIEDDYAEKLNPVIKYSIISNVYMKKRFVKILCIDLILKRKSQEDLDIEDILNNQYSTRKVTLLFDLHNNSCISFLINKSTNEILISPHNYVTEKTIDKSYKEGHKYIFPQNNECKLIPDHYEFFSTFLNLFKSRKEQNFISSLMDIYEGVSYNLLLKFYDYLNIPTHIKFEEMDKGTLLDFF…
PKH_010700	Pk	OG4_10853	-	-	Cg3-like protein	cg3 protein	MKRILSLSVRRLHTERGGRGHYTSHCAMMKCIKRLGDLPKWKWSQSHIEKNGLRYFTSGRKDPPKEIKKKSFFLTWRCLGFNLALSLPILYFYLLQCEKKKKGKGQIGVTKVENIGMPLIGGDFTLFNHDGKVVTNEDFKKKFCLIYFGFTYCPDICPQELEKQTIVIEKIVKKYGDVITPVFISVDPKRDTLAQVKHYCSSFSNKLVGLTGTKEQIKKVAKLFRVYYNEHIVDDQTAKTDTKSGDPSNIANNYNYLIDHSIIHYLLDVDGKFVDFFGKNCTTSEMVDRISHYIDLHLQSGATVEVTSGTTLDNTSH
PKH_020850	Pk	OG4_38626	-	-	hypothetical protein, conserved in Apicomplexan species	major facilitator family domain containing protein	MEESSKKKKKNGMVGNFLRKGIDINNFSTRKKYALLMLFCVYIITCVGIFFNWISLSDFFYHGNVYIDDCNSVRSGGRNNREGKSYSCKEQDKRVQALYPIILCSNFIMSAISGVFFDYFGPKITALMGHTFNIISWILIGLQNEGKNNTIILGAIFLGLSGDSSYIPILSLIYLFEENHTMYTVILGCCASLSFSMPIFLDMLTSPNDTPSFQLTCLLYCTFILVPFFFVLLIFLPFKHISVGEPVAEVAQGSHNQTLQELEGYVISGVNPMDNPVRSHTDRLVDDSVQIPYDRPSATQGNQHSLHHGSNATDEALVPLYAEYEHEVEGENNTLRELMIERVFTSSSFSLPSPNDCVLRKVGTHTSSNFTNRKEDSNDVFSQKEDSSIIMDGGYARSF…
PKH_030360	Pk	OG4_41272	-	+	conserved Plasmodium protein, unknown function	trna -lysidine synthase	MYLPIFILSWGFLYGLFYYHFAECVRRRGSAQREFHFVSPLLGCSEGGSSHGHKQRRHRSYKERCNNKRMHTPRRSCGEQFDQPSTHRCLTSRAHLDTEAQISDVLLYPEEGPNGKADLGQGRRPALKENVKCKKKEGGASRKALLKNICAVINEESEERMKQLDELNIGMSNIGKNRNGRNVLEIFGNSGNHVEKSSAVNELSLNGETIQIVEAYWLCTLKNRHFYSFLKKKKKLIFSVSAGVDSLSLFYSFLFVLYKILVILRYRYSESYESILHILNRVYSYSHDDIDEIVRFSEGDSALRFFASVLNNITVLYCNHATREECIKEKNFVKNICRRHKLRFRTKLLKNNWEATPKNEPTRKRGNNFLLLAREWRRHVYVQLTRQLEKQARRERHAR…
PKH_031650	Pk	OG4_25868	-	+	conserved Plasmodium protein, unknown function	conserved hpothetical protein	MKCAILFGALLCVIGWGNPSIADTIDDTIGDTIGDTIDDTIDEVVGDVPEDTTGEAPGGEPILPGVDTEALVNLANPNDLYDLLVGKEKGRAEDADLVDESPKLKGRWRNAPKGGSQLGQVDKDTFLTLYESALSHFDVDGYGVFMQEVISQGRRKDEQMEGKRWRKGTRESRPHCDRGVRSAVINRVGSDGRRIPRGVTRREKKTETGQATTNNVEYPGGAIRSAYGNNLSKWMKDSLEDIESPASIKEPGLANMLIQSLTMVKGLIQSVASSVVDIVPPLIPPPVWINRPLPCLPMVTGKNCLGSILYPITSAEFVIADITDSIMNGIISSFPSKYASKVGKTSDAQYRLCAMAYLGMYCASIFPICWMPIGLKVAETMSVCLPQCLATLIACPGFW…
PKH_040310	Pk	OG4_42457	+	+	conserved Plasmodium protein, unknown function	conserved plasmodium membrane protein	MKRAMFLLKLLLLAAIATQEGLLSWQLMTSKMLVVMIDAGLLFIFLYLQVRSANSTHMYMIYIYSVVAKITVIYYVSLPRTLISLHDETGGMGPSPQSPALPLPLQLNTYAESIHIISSTILLSILIYILFFFVTDFDLLKVRFINLEIFFCLLIITHVSIDFIDISDFFYCIHLHFFLYYFRIVQELCLFTNPVLFVHASIDKNGPVEFYSFCLHLYQSVFILFGVLLCVNIAIHAYSLPSFSYESNKRWKLSAKGGADLPNLPSNGPYLLHSYSRDTTLCRWTNDQKKAANGAGTKGYYENYPSEAIIKESSSLGIPPQLPAQLPAQLERKYSISRGMRGSTSPFSPSSRALGSTETFLPRSKVGGDAMSCLKYISIYSFFFTDVSLFMARLFLYLV…
PKH_041100	Pk	OG4_48203	-	+	6-cysteine protein	transmission-blocking target antigen p230	MGKLGKLKRVLLLLPFVHIILAQNNDTQVGVASREKVRSSGLLSIGKFHGGDQGSYDGRCISLNGDSYVLGRDPFGGISNGKYYPRGVHYGGRNRSNENHSLFRLLKNEDRGNDVDIYYMEKFPHREYSNGRKYIRNGAIKMVTYHLNGQAKNLNKDLVIIPHELFGVSTLEKFSTKRVARHLAEEDDDDDDGDDDDDDDDDDDDDDDDDDDEEEEEDNDGESISYGDMDQDEEQDENYQMKGMDLEEDEDDVLDSDVFLPLVDSDASDGTFDAVDDDFQTTIKKDGEELEQSDSTVEIFASSNTNKEYVCDFEKGKILKETTKKTKICEMKIQEPLVKVKIVCPTKYSDVSADGSMGFIPKKAPYVTLVNENEGSAIKKDLLKEKKLAELIHGVIINP…
PKH_050400	Pk	OG4_54936	+	-	conserved Plasmodium protein, unknown function	hypothetical protein in Plasmodium species [Plasmodium knowlesi strain H]	MCNISSKEPFRRMHYQVRHRTQRMSSYGAGLSDPSSPGEDMNSYYDEARYLSKEQMKAYIYKMKKEIEDYKVREMNYKIEIKYLRRKIERLKGIIQNDTFFFNDQRGISVRSKNSGFSFQSGMNKVNSEENCKSGRYRSGNVSEGNNYHHRGFTKRYDSHYGLHDHHHRNSSYRHRHFYEDNISEDKISNVSMRSINASIQNNKRMNVRNLTGRYSDTCRRSEQSRMVHAGKVHGTNNTSGCVDRSNKLKKYSRENIVHAVPIPRNVINDKPSENGLVMPMRGGSDSFRSNRSYTSCTSKFKIKGHLISNRRNMRNMSTDINTSIANDIKSYHTSKQSILSGTNQQLFDRNSSSLQKRSGAGNVMEARTISGAKQLSIEKLSKLTPREVRKKINCDLFD…
PKH_060960	Pk	OG4_34263	-	-	conserved Plasmodium protein, unknown function	conserved plasmodium membrane protein	MNEHEINELEEIRNAISRKNEKGGHYYTSVINTFLLVAHFVLYASIVFVHFSYRNDDFSNCFNKAFSSVIRKGYFNIDDIEILQRVLSGMTRVCNYGRIAFLKYELEGGSNFVLSFYNANYSVEIHKLFHSMIFKTQSSISIGHAYHWYEWLLFLFLNMSALAVVYRQCISRGKQLNVLYICLVALIDLSIIYEQFIDTVENYSVHEKGVDLLFCFYYLFLILSILKKLSNYWKVLFIPVQIIRTTVAHNYMLLLFLLTFFLLTLINYFSSGEQLKAYFSSVFTFQDDSKYKNEFVYNFFVVIIYSFFFIPMITVASTATAFLLINNNEDLFDWKPRSSHLWGKLREYFFFLRRTNERGTTGRKKEMTYEEYEEKKIKIDILKIGSVILFFLFFIFFVL…
PKH_061400	Pk	OG4_48350	-	+	conserved Plasmodium protein, unknown function	conserved plasmodium protein	MKTHRLIEYVEVLYFLLTCLNRTHVRGAENNRAGLAGLNDNVLVAFFLLVQLEVPNFLGPFSKKEKYEKVIDGAIYLFTNTVVTQEWKEEERGYTVQDVRHVIAGLNSLLDDIKNGNEIYITWIELITNECWREEDGCRALSPRSCTLSVLNALPKKALSVTCSSCIMYALNYALYSRLLFMNMVQIQNCNEENNLKLINLTKDVGFVREHRIYLNSLETISVAKNVRSQVIILHIKDARKLVDILKTHGHERFTQVVRDALLEVVKKTIETYKRYLHHNSSFSINGENEKKMNLSNLVYLTINGYLYMDDATGGNIRVRDFGLFFTEDSLEKCLLMITRRNLFLQVEMGTLGAEAHQNGGHHFPIGNLLTLIEFQLVLNSYLHFGENYFSKTLMLMKK…
PKH_061630	Pk	OG4_48144	-	+	conserved Plasmodium protein, unknown function	conserved plasmodium protein	MKELYLVYVSLLVFLFFTKRISSEELLSVDRIRHTMRHYGVMDESKGFSNFALFYLYNALRCTLTQEAFESHEDDKYRKTIFLVKNNLLRLQERKADRNLWLFFELDLTDLLLSAAAEIEANMRNYDMGLLEMYNELRLSDFTFNRVSNLELDICTNAVLSVEEISLHMTIVPFLLEEADISTKMYMQEIRQALWKTLNFFNFFTLQISEHNITVANMYRKEINLFLKVMDKFDFISMNEENILEMHDEIYLKKRYGKKVLGNFFIFLNLFPFYQVLEHFEYFHYIEVVPIYIRTKKGTMKSRGYNMENIFYPLVEGVYKHDLKINEGIILIRILKQYNIGSHTKQMYYYDSDFIYKAIIYESVLSSSTEASSGQSGVKFEALYSQNIDIAKGVLPPDE…
PKH_071440	Pk	OG4_11602	-	+	N-glycosylase/DNA lyase, putative	n-glycosylase dna	MILHIYQSLLLLFLKYIYISTQIRSKAKALGLGKMKRNFPASKNACVKTEGVLFRGRKNATGKKGPTKLFLNTINADKKNIIKKVKKECRIREVKRERNMVCVHRPNEKNNKSRQIKKLHNEPPFFVIKKFELKWKRINVKKNELQLKYCFLIGQEFCFSEVCMDMYIGLVNKKIYLFKETDEGIFYQCVYNPRSEAGDGSQERQCDNPQNGNTNDHDEEDVKDFFNLQFPLSKNIEMWKRKDKRMKEITDKISGLRILKADSVESFFSFLCSTNNNIPRITLMIDCLRRRYGKFLATVIFHGEDVLVKLKEDKDGEGVASNKNKGYVDVMKNRQSTRLKVGEIQSVRVKGEPLQNGDTEEEGKSVFPPKRDTQLRVRVKEEYPQNGDTVEEQNEDHED…
PKH_071950	Pk	OG4_42707	+	+	conserved Plasmodium protein, unknown function	hypothetical protein, conserved in Plasmodium species [Plasmodium knowlesi strain H]	MARRGLLLLFTLFCLSHFAKCKVSNGGYEYLHSRFLQSKINVLTWLTNVIYPSETPKYFKKHLDYQVCREYFSKPTYDPVDLNSQWLQTDNWQMDNQKAIIEYKGKDTYRESKHPFPFGWLDNRMSTRTSLIKRDFFCKKTIAQLEVQMNDAQSCGLIFRIVGERNYWGLLIDNKVLKLVRVREGELLVLKEFKELKIKKDEWYVLFAQEVIKDIKIKAGKYGDLSVDYLRKSEDESEYSTAKQGAFGLLANKGNCKFRNIVLRGKKWSTEYEKLKNGTPPLLYNLEEIESLYENFKDWCPQASLCEKSKYENMNV
PKH_072240	Pk	OG4_11662	-	+	prolyl-t-RNA synthase, putative	prolyl-trna synthetase	MMFCSLVLLLHIANYLRVVQTVHIEKGAFLPLAPFNRGRANRVGMYASNNHSCMGSESIFNKICNDTEKKNGDKASELLQRANYIKDVNGLYNLLPLGYKSIEKLIHFLNIHLKRVNSHGLFMSILQAKKWWNISDRSKLYSDEFLYVYKQKQQKGDMSKVNETVMTKKKMEDDGLILSPTCEEQAICLINQVYNENIPAKSLPLLIHQFNYKFRNEKRLEKTLFKSKEFLMKDGYSFHSNDICLNETYDSYKECYGKIFSDLKLPFKVTKKRKMDKMNALESHEFQVLCRDGKYKEAAHIFKLGDYYSKKLGIKYLNKRNEKNNILMGSYGIGIYRLLYFLVDSFYDDDGIRLPEQIAPFSVYLIQTNQRSKYSATKVAKIVKMAQVTDAVEAMDAPN…
PKH_072330	Pk	OG4_64931	-	+	conserved Plasmodium protein, unknown function	hypothetical protein [Plasmodium vivax SaI-1]	MIGTIFSILLTILKLCFATSPIIGIILIFVLNKNNVPDDKNKKPDFYFEVD
PKH_073110	Pk	OG4_28703	-	-	conserved Plasmodium protein, unknown function	hypothetical protein, conserved in Plasmodium species [Plasmodium knowlesi strain H]	MDGKRGHTFDILPPPLEKIKKMDKKRSPNIAKELPSNELTLEQRQRSTQPMKTIIKKMDPTPHEEVKKNNEKKKKVNNYVAQKYSNVILNKDEISAIISRNSHFKTLVESEEVSTFMGEYLKNPLIAIQKYHKDETIAQFLDCLFGYMNEKSRNIHLENLSQSFTIPRG
PKH_080730	Pk	OG4_39697	-	+	conserved Plasmodium protein, unknown function	gpcr-type g protein 2	MNIRLVCEIIAMILLHVIFYKVSIYYLLRYLDILNHSNKFNKNIFFITFLVCMSIFSLFLFELSNIVSNGTITYIWHIDICVLVCLLYIVIPVEFINTIFDSSNYKEILSPEFNSHSHIKLIKKYYIKISAIYKEQNGISKKIKKHFFLIRSIIFLSLLWLSLGKLKNMIYKKNYNYVIADDNTLDIRKYLLYSQNVELQKKNQNKFFNKTIFYLLERRKKCFNYYSTAFRRFHQYYHKGQNQGGQTEEEKISIFRKCMNRIYNLVGILCFMFLHYLMLLYKFIIGELLINICALGVTTNSIVAGISSMYFIYDYITTFVYYVHIPKLQMQIYNIEESILINFTNYMFKKEELERLQSNFDMNSKRFLYDAKKGGSPGGNILPVKNSSPLEVPEKNGAE…
PKH_080900	Pk	OG4_11144	-	+	conserved Plasmodium protein, unknown function	serine threonine protein phosphatase	MFTTLFSLLVVLLYNMFTCCKNPPAHSVYAIAPINLKRKMNYLLKKEDCYFYRQNLNFFSKEFEKKLKKNKKTKNEMGIKDNIMDKLSYLPIQGANKSSNFTNTKCDTQLSNNFTKELNFVTKLPYTFLKNKVTFNFFNMANSVYLKYKINKNILFSFNKKAFCSNGKHSILTNYKIIKHPDKVESEDCCLNGKGFMAIADGVGSWIRHGVNPRKYPERFLQLLQKKMDENENMKIEDVLNYAYLNNDIEGSTTVCLIIFNNNSTISTAVVGDSQFILIRNDSIIYRSKPQQYEFNFPYQLGSNEVSKPNDADIAHIEVKKNDIIVAGSDGLWDNLYDNQILNLVKQNNFSTLSEKIANEAFNYSKMKRWMSPYINNYNKEFKCHKTGGKMDDITVSCA…
PKH_081250	Pk	OG4_47305	-	-	conserved Plasmodium protein, unknown function	ring finger	MSVLSLFHIGSPFLRTNCVEEKEKYENFICSVCLDICHTPVVTACKHICCYKCLYYSLLHKRKCPICKQAIRNNELKKISGKRKREYEQLRIRCNLCSDELKIRNYEKHLKFCKYKRCKNYMLGCDYYDKRNKIKMHEEACEHRLIRCSSCYNLFYYKNRIFVLTLKEKYELNIRCTYTYYSFYYNLLMNTNFNFFNYNKYITNKHSSCDNYLSRKLSVLATFQRTLDRFVCKSSPGQRIPTVDGRNWVPTQNNSGAAIQCKNNIFNGAIRDDPTFSYRGRVIRSSVLEDERSENNCQSLLNFSPESARLTDDRSEPRHRTNRFDDIHTGESESESESENEEEGSNQSDNGGETDKLDEMRSTSQPSSRNYSKASRRAKRNNPSSGDNACSEEEYLNIL…
PKH_090050	Pk	OG4_54820	-	+	conserved Plasmodium protein, unknown function	cpw-wpc family protein	MKKVGVLLFVLLIKEIISLKICSRRKYPNVENGVYQLDNRGRPIKIVDVNYHHVWELPKGGSVNSYTVVKKNGKVKKFSEGTNIIYGTTKKVSGGRGSEEEEEAEEGADENKIKKEIEKRKKLNNIKNVSNVAKNEKDMEQKKKEKKKLQVPRAMHITAEDVPEEEQANEEEGIAKELGAKIKDNLESHYEESKAPSSLSGDLLDVKIPTSLEKLLMDDLEEGKWLSRKPVHDKICLRDYTKQCPSLWEKVSETQCISPKDYEGPCSHLMTFEPMSAKEKSLIGMECKVNWLCLNELCGDSGRDYSKECPVDWTYTGMCEAPENYSGGCNKTMDFGAFTKKEKEDFSSACKVVWPCKEETCGEDYSITCPKGWSYNASKDTCSSSHGFEGLISKEEMES…
PKH_090070	Pk	OG4_54821	-	+	conserved Plasmodium protein, unknown function	cpw-wpc family protein	MKKVGVLLFVLLIKEIISLKICSRRKYPNVENGVYQLDNRGRPIKIVDVNYHHVWELPKGGSVNSYTVVKKNGKVKKFSEGTNIIYGTTKKVSGGRGSEEEEEAEEGADENKIKKEIEKRKKLNNIKNVSNVAKNEKDMEQKKKEKKKLQVPRAMHITAEDVPEEEQANEEEG
PKH_090370	Pk	OG4_47967	-	+	conserved Plasmodium protein, unknown function	conserved plasmodium protein	MVCVQLLPLLFILINIKCVVSVRTHTFGSRLFIQHKNNDFVHSGERDQGRRKEVPAFVNANYKKSLKLPSRSILDRLRNPSKCLSPLEGSFQSVQVRRKERKGDASPLQDLNITHSSSVAVIQDEVKNVVREKGDILSNGFNERTQSRHTLGVGIDTLRGDSEDQVKHDRGREIEKGKSPKREEGQSKEISQTHTRVGSLIRRNRGPHRKKGTPQGVVDIQNTNVRSFLQGAEESRSLHLLNYIYQSWKEKNFANFVTAIKDEGFNHTCVEKWLHKMSIGLNKKYIKIYLKKDYVLIKNKYFDPNQTRVKEFHLSYEDINRCLEILIKNMGKFCSYEMSSILWAITIILIKLFKGSNSIDISGCDFYLQNKAVTTRLFHNFMKFFSLIAFHLNKVKEYL…
PKH_090450	Pk	OG4_27482	+	-	conserved Plasmodium protein, unknown function	vacuolar fusion protein ccz1 homolog	MEKTKIEALFIYDEDVKKAEKSVTDEELQAEKVIYYYPNETDEQVKVMHTSAMEGVSAFLSQFSKSHMEHIITKDNLIVIHKWYKHIFVTVVVKNIYKNEKTELLMCKLLHKVMDNFISTFTLLHGHIRTFLKYKKNKTTGNMNRKTNLQTLLDDYVFTYINTINNECVNIHNGLQSFHFFPVEKHTYVTVQNLISSLILGQKQIKHGCLLYEGHLIYSSLEMSDTKMIYNYLVSYGGTVNNLKLNQHPFRKIASSAAINPNGGLSSFARCNTLDEKNAFLLGIKKSSIFMPVVSLSNEKKYKLVAFVYKGILLVLLIKGSTIKDEDFDILIDVQNKCTNENSTSIHSLSKLNEVLSVQFKKYLNQDDPVKYLYYNHSSNSIKYSINNKKINNEELFLV…
PKH_092010	Pk	OG4_48240	+	-	conserved Plasmodium protein, unknown function	conserved plasmodium protein	MEKSSRLHGLELQPSIEFDNYEGGVKMTKRLSIKNTTKKLIRFRFLFQSSVYFTYPLQEVESISAGLNKSYPITFFNPLNDFQTVSETLNIVIEDKQRDKRIEVHLRATPLKCDVILPSVLHFKDMVIKQKGKEELVIKNQGALNAVIKLTHKFTSKEKKGKIKVEPSQFVLKSSQKQNVQIILYSDSPQKFQECLSCSIIEVPKDLEAKIFPQGPKVTNATLNNACEDSGEKGVNDIIQMINQENVQARLIKKRIQLNWVAVLPQIIILSDQDKQIFHQSVVNFGEVALGQRLTRSIYLHNVTSAPITVKVKKRNKKKENAKKSNVFHLLKEQFTIKEGSKEEIIFHINGQNQVNQYTEMIQFKACTDYCIEVFFICEIKNVKLHFTKVVYLLENLKL…
PKH_092590	Pk	OG4_64938	-	-	conserved Plasmodium protein, unknown function	hypothetical protein, conserved in Plasmodium species [Plasmodium knowlesi strain H]	MRNVNLLHQRKFFFLKFCSIILKTYFFHHQIFKHDLIALLPCLIYGNNYKDVFYFLLYAPVLVDLDEVVSERDKKKKKLFRPWVGKFSVDTKNKQRIQDIRENMHTYFRAYFEAVLRNSESKSGEGDEKKCLSWRYELTKIVLLKLASSEILDILNKESIKEMLRNVNHSVRCNPSLLILLKEEFIGLLKNESSMYYHLVSVKILEIVAENTKRMNITYDDIEKYYFTLHSFFSGGNYTEFKFWVSLIHAFTNIAIYCHDFSESVLRLYASFLSRSDVSLMLKHIVTEHVGMIKNVSYAKGGFLS
PKH_092970	Pk	OG4_54935	+	+	conserved Plasmodium protein, unknown function	conserved plasmodium protein	MGKKVLLCILYLVVALLYEGIEGSILHKMNMKKEGNFFVKKFYNNKLSKTFSQDDYHFFRLVFMKFLTKTNFLKRNMTLDDVVRTMEYIELGTNQKSDDVYMTLYNEIKRISQEQYQMIYVKNEVDEEIEREIQREMLKSVKNGRQKKNVLAVVPFPNQEIYNSSESSKRAQLLLDILYVAIIASYQTLDEAEKRNMLKSVYENTLKQWMSLNFLRKIMRYKLSLNKDGILLYVSLERNPSNGANAKENENAGACARANGEAAALKQEDLYTIEAELKYIVEEFIRALYPDYLGHANSAFVIDKYSRVCLAQLQIVGYRTSSEDKLWTSHWDGVMKQFGGPPPGGSPTQRNRHGDESDPTVTAEDIPENYFHIETNRNKIVVQVLITNKEGGQNRIEDD…
PKH_093070	Pk	OG4_10611	-	-	glycine cleavage system H protein, putative	glycine cleavage system h protein	MFAQKMLLLKRPFLPARVAPLCAQRKVSRLITYYTKSHEYIKINDEDLTELKKKNNVKCKIGISNYGTEKLGEIVYIDISQNINEYVKKGECIATVESVKSVGDVYTPISGQIVDINNEIVDNVNLMNGNSESDGWILELLTNDVNEKEIMSFSEYKKMCEEEEQREATKIQQSERDCLEEKNKNKIFDLNDIKNIEEKTKK
PKH_093400	Pk	OG4_41271	+	+	conserved Plasmodium protein, unknown function	conserved plasmodium protein	MKQKTLLKISMHLFLFCCLLSGLGMALTVSSEESPPRDNFLSTCMNVIDALTFYQDELQKYKYDDMCAPYRYIGNTVLEKHNLSNYNCYAKMQKALCKLSYTLVATPEGESDKGEADEKVERPHTESTNEENSTNKEHPEEDFPIERMDDTCKRTKDMFMSLLRKCTERGYADPLTHCASLDIEKNVISDGELFCESSFERKKNVQENENRKSVYVNGYKKDITETFHFEEYQRNDCIGMVNLYNTCSIVRRSVFGYNSLSHCAEQSEKHFCNRRLQKMEDKNYIYTCSDVVLPYLLSANNKEKTYSQMCHDVKDYANMLKNEKNEFLRRKKEIQENVKHIKLTQKLYKITEHIFQTLQEEVEKYNPDLFHLFNLLKNAKIMLPNEYMLKLDEIADGMI…
PKH_100150	Pk	OG4_41653	+	+	conserved Plasmodium protein, unknown function	cysteine repeat modular	MKGNIARLVFLTYLLLPCPLSTSIFCNYGEYFKNGKCYPCEEDTYSSYRNSESCFSCPPGSFNNKKSSKYIYDCSCDGEFYLNYVGNRCDMCSDLGNRFYCKRDLTELFVDNLDAFFKHKDEITVNYFDRCVVKENKMNVYPFMNNLYLFCKSPNVCLDTCGRCSENNEGFMCNNCVQNYDKNIFLKYATCRKCFHIVFIVLQMAVYFILSIAFFLVLFKCINVSLYFYQIDVYKKGTIYFLHYFREFIFYLSLILLLSFSNDLTETERENYTFYGRDGKEEPTHLHSGDAKLHYFLNIYLHNAFFDIIKIFHLNFLHFVKLGCLKVGSNRSKIYSIQIVTLLGGVLTFICFTLMCNLIFLYLRNGGYNIVADRTGERESDRVSRDQTKGCKRNVGRKF…
PKH_100830	Pk	OG4_30692	+	-	conserved Plasmodium protein, unknown function	hypothetical protein, conserved in Plasmodium species [Plasmodium knowlesi strain H]	MKNRLKRTYIYIKSNLNNISSIASIICLLDCVLIPVITVVISIFDVAKGSDHGHDHHDHDHDHHYGWHEIVEKVALYVMTPIISFTTIYNFIQLKNISLFLMTLVGITLFVLTHAHIQVPNQNVMNFLRKMHIPLAILAAIFLIGTNRAAHKLLKSKNLDRCCKHKKITNNFDKHSCTEHQSCDHHHHHHHDHHDHHHHHHHHHQDDLEMNEDNYDMHNNKGKNDNSASFERYYHIGFQQNGDQELVRFL
PKH_102010	Pk	OG4_83827	+	+	conserved Plasmodium protein, unknown function	hypothetical protein, conserved in Plasmodium species [Plasmodium knowlesi strain H]	MSGIRALYLFAPVAEGGQHALIYERRFPSVEVCARSVQTHNYVNLSKLKKVEELLKEQIIKRSSQEVDTHSQFVQLNRTICCYSVRAKNKVICPFLLMRSNRFILIVLLLMENANSEIPSVEAVNSANKLLYYNFMQDFLTYMEGKMAKRGSCLLTHYGLGNYNKVVVLQKIGTMGDAYITSTIPFGRFLGGRNSPFMDYLDGDMYKKGDVLQSTFFPFYNFLMLANREKSVHLGKDAPTVSCTYLPQGGSECGLPEGKLQFTTPSQKSGSDEDRLLSSDNFEDSNSSGETLENLPSAFAKRKEPNDVLYINAKPPFVSLTNGTRTNKKIRETFFKLLVKFYNLISRKNLLRKGIQGETSNPPNEHYHLYLFLLYIYSSLLRKNEQTAIENYCAQNESL…
PKH_102490	Pk	OG4_48202	-	+	6-cysteine protein	6-cys protein	MRHAKGIARAVLLATVLLARVQVAMSKHHVDLSNSSKSTFLLNVVPGDTVVYTCPYSFNKDMKHICARERDFFDRKLFCFDHVIINRNVFQLRDYVRGAYNIVSKYVNNVYTSEFTVPPVVLMNRHFECYCYLDDGGRIQKKTLKVHISKGIVKRTPGCDFNDEYRESTAITTFNNMNRKIAKACDSYPRGGDTITLLCPVNYTVQPDGCFNQVYVKKEDIQNDKNKLEERFNISRKWEQDKYKVVSIETLFGKKLDSVGDEITRFAKIPVTNDEISFTCTCKANDGSDTLMMNVYINESYDKFVQSSHDKSDQSNQGNPVQSNQGNPVHSNQGNPVQSNQGNPIQSNYNKYIESNKRFVYPNDGRVEYTRHKFSSTSTVSRTEERSGASSSFFAYFVL…
PKH_112210	Pk	OG4_45892	+	-	troponin c-like protein, putative	myosin light	MEELAREVELTSLFNKLSDGSKNVNIENALIIVYKLGYVPSKEDIDEFIHATNGICSLSNIKKFCGKLKLPSVSTEVLEDVFNHYDVNRTGKIPKDQFKSLFTTVGSRMSTAEMDVIIREVCNEADQIDYKEFLNK
PKH_112680	Pk	OG4_48413	-	+	conserved Plasmodium protein, unknown function	hypothetical protein, conserved in Plasmodium species [Plasmodium knowlesi strain H]	MATARSCPPRLLLSLFIFFLFQVSLSFVPPKMNSKSLTVGSRNYHSQWQRKKGRMQRSPLTIRASPNFLTSIITPLSNENIKKYFVLRCLSRICVSLSSAFSLNAKIHLYRKNNDNLLLTQVLIYNEVLVKVLKICWLYKLRSFVDSNIKFCRILSTVFYVIGIYLDLLSTLDFFKNSFFFPCMFHVLSSTLKSLSIMTYASIRSATYLRLCEMLNKQNESVVPCVLDHFKRAGRVEPTNDHLVTEDQSRERRDNVKLKEEKVATHLGEDTHVSVVGAEQGDTPPVSLSNGISQIERSNYCSSDANNSVNNAKKTYFIGEVSVLTDLLNSLVDLLTVVLLTRATKYIKNKIYFYFLLSSLHLFFSYKELQCLLK
PKH_112750	Pk	OG4_48315	-	+	conserved Plasmodium protein, unknown function	hypothetical protein, conserved in Plasmodium species [Plasmodium knowlesi strain H]	MNHVWLVNLIILLHLFLRCTCYQMIYVDSFDQKNDGNDLNNLSCSWRYYCQEEFHFCEYGCSSKKNFKEGYNVLNTTNFRENCFINVECENHQIYFDTEDPVHFLFFAKPFFRINRDFTLYVHLAQRNKASDESAHPTNEPTGNPIWTTLRLSWEKINDWRKSISKKHKRTFIKLLICLILIHMILFYLYIYTYLYLDKHDEV
PKH_113540	Pk	OG4_54908	+	-	conserved Plasmodium protein, unknown function	hypothetical protein, conserved in Plasmodium species [Plasmodium knowlesi strain H]	MHWEQLEKHTQTEELEAIIPKYEGPAEDGCKERGVSSLEDKSIRGEMSVSSVETICSYSSGGSRLGAAGEVNEAGETGEAKETHLTKGEEETSETIQSDVTNIAGTTKRVDVRAQPKELRRAFTPDDSTHTQKAALSCALGRISSNYVMHASNNTSVVGEWSRKLSTSNTVNLCKVTKFINLCDEELSVSSPYIRNDTKGAKTVEEMPQESVTHLRNCKLESHQVGVSQAEGSFENAPQHINDKDRHSNDRDRYSHDSDRYSNDKDRYRNSSKVNRQSEASEDPCYDHPCWNKRVFIRRIEGNCHTNGRNTFTYLNDVLDKTYKETVELDGSEYIFLYDIICVEDADVASQLDRKGESTLNRSCSAFAGNCRIPLEEENHVLKFSAYNKYVNFFHNLSN…
PKH_114760	Pk	OG4_48376	-	+	conserved Plasmodium protein, unknown function	hypothetical protein, conserved in Plasmodium species [Plasmodium knowlesi strain H]	MRTQFPCNLLLALSALCFTVALCKKMLFVDLLNGVNINYKRKVPICKRPTRSTEYLSNVSLHANRNVEQVASKNGEPFITTYHDNRDENILQQYIYTLSHLTIFDVERDKSIPLNISLLLKACLASHNYIKNIEIYTSDVKNKEICSFIYENRNDFDNFFKMHVMKYVDFFGNPQIMETLKSYMDNEQEYQRELKIFKQIDGDTKIRKNVLEDILFECTRLNKIIQYSLAVNNFDLYSPTVFLKLFMYFKNYGIYYYIFENNIKRIKYYYETKELRGEDKMKIDKIVDHYLLTLDRFNRMYEAGHAMP
PKH_120830	Pk	OG4_10575	-	-	Pfsec61, putative	protein transport protein sec61 alpha subunit	MVRFLNLIKPVMFLLPEVQSPDRKLPFKEKLLWTAVSLFVFLICCQIPLYGIVTSKLSDPFYWMRVILASNRGTLMELGISPIVTSGMVMQLLAGSKIIDVDQSLKEDRTLFQGAQKLLGLLITLGEAIAYVVSGIYGNISEIGTGHAIIIILQLFFAGVVVILLDELLQKGYGLGSGISLFIATNICETIMWKSFSPTTINTDKGIEFEGAIISLVYCLFTESNKISALKKAFYRTHAPNVTNLLATILVFLIVIYLQGFRVDLSVKYQSVRGQQGTYPIKLFYTSNIPIILQTALVSNLYFFSQILYKRFKNSILVNILGQWQEVESSGTSIPIGGIAYYISPPNSFADITNDPFHTLVYISFVLVACAFFSKTWIEVSGSSAKDVAKQLRDQQIGM…
PKH_121520	Pk	OG4_34299	-	+	conserved Plasmodium protein, unknown function	hypothetical protein, conserved in Plasmodium species [Plasmodium knowlesi strain H]	MFWHQTNERTFRIILSLFLRAFFFLPVCYGFAVSNGDRSLIPNGPWTKQNNPCGVKRISPIKINGKSGKKLYSIKITHLTENKIPEEYFKYNLPPEPIYPYITVPNNLYTRQKKDEHADGENPPNGGNKLDGEEYPDSAIEIGKMSSEEFSKLNEEKKKKMKALPEATIEDYIEDTNFRKYIHPCLVKKVSGKDRQKIHHSLLSLIDPKVEYSMVDCFDENDEENDLTEYDATFRGIAPWPSTDELRRNDNDYQFEKTDLEVEYNITYDKTGYREFRNKLLAEQLHDGGREGNREGDETSTEPGEATNGKKYRTDGEPLGGQANVDAPATVSVEDIRKLYFKKEIKTLREAKEEMAKWEERKESSRSTWTLTEDELKLLPDKFRKLYEEKRREKLEKLK…
PKH_121700	Pk	OG4_48442	-	+	conserved Plasmodium protein, unknown function	hypothetical protein, conserved in Plasmodium species [Plasmodium knowlesi strain H]	MGLKKWVLFFALSNLISYVKKEGNGFCLCEPIPMPMPQPELDYMDEPIPTLEPEAQPQASPDDGNTNNNNFNWGNNGNFNGGNDDDGDDNDDNDDDDDEIIDNSYDDNNDDDEADNNDDDDEEINDNGIKNSKNKRKRNNL
PKH_122250	Pk	OG4_48338	-	-	conserved Plasmodium protein, unknown function	hypothetical protein, conserved in Plasmodium species [Plasmodium knowlesi strain H]	MIKMRYLPTRGTTLSFVLTTLLFILYNVKIFILSEGRSLKGYHHLTVDSSLLTPLRHPYERGFEGGRKNMGWKGERTPLLKIPQFHSPREDHKVDPAMLKRSSLPSASILMNWKDDVKKLVNRWGLLKTNREESTEVHPLKNCRWEITTFNFLLQKKSSFFIHINENGTVKMPDDLQGTWSYSNYYLTWTVEHEDRRVYYTAELIWNADKSKLVKGIIYEEKKRQRFFLPAYFFRKILGSFEGRVSLK
PKH_123860	Pk	OG4_44098	+	-	rhoptry protein, putative	rhoptry protein	MNRAKEEGKRPGVAKLDFPDSESDDRISIDEENVWDSDISIADDDLILGDNEKGEAEAKQPDGSSSDYGTTMIHLCQWKCFIFFFSFLVHHAADTLKEGIFRVERSEDITDGHIVGDPPEGRKQGVVLNCIEEKHNKEQNQKKETHNTGEQVNDKGPPPNVNLHDDEQFIGNSGECTIEEEKNSPLSHGSKVIQEEYPPNQTNQKCANYSVQTDMIKMDLFSDKKGENSLNSAGEKNIGENIQRGRSKEDLLPDQTTSLNAPMEQSGISPQLCEEQPDVITQDEGQMHTEVDTTTQLQEQCENLKKKLEEYEKRNEEQTNMQNELLEKLKMYENNCNEMKKEKIEGEKNYEQIKKYCNQIRNKCDEYEKKLQEVQREMEENKNVIKQKEEEMKENISKT…
PKH_124170	Pk	OG4_22398	+	+	hypothetical membrane protein, conserved in Plasmodium species	hypothetical membrane conserved in plasmodium species	MLKLHPLILLCILATYAPFILKEENFDHTYYNKNESVKQRDTQDRESRGRLLGEDNNEFFDIGKLKKLLYFQSNLDQTIKQKRREEKKLRKLYKAAKSGNFAAAIRNSQKDTQQNGAPPVENEHNTKGKSDMNDGGEMNQHEVLQRKEDNPVDMNQQTYGEEQMKNETGRRTGEMQEEIHPLDTKVNGPTEKFINKHDHVDNTRNVEKEKKEENVKHSDNAQLRNILQSVEFLKKTQSLKNYFGSSESQSRSSDVPPGDQNKYADELKIQNENEQVTQLSGETNYGTNNVEGNFQQEYPMSKNNEEKKNNYTEEPFYMFPKNDEAEKFNTHLRRSKIKEFFEVNDLVKYMKNLLGIKSNIHEKFEHEKLIVKNCNYESFGPEFCSVDEEAKKMLWNYEN…
PKH_124540	Pk	OG4_34375	+	-	conserved Plasmodium protein, unknown function	conserved protein	MGNKLCCVNNDLQNSKSSIDIYKYDPREIYGDYGDWTLESWIDKYKNGNSIKVAFPDGNEIQCHFKIFLKEKCFELSLDNKVRVIKFNDINCILHRNSCESLLESEQNLLKSPKVIGIRLISTLKAIAFAMDSPAEARMFYEFIEKYCLNC
PKH_125950	Pk	OG4_16178	+	-	Glutamine cyclotransferase, putative	glutamine cyclotransferase	MASKKHAKRKVPPAIGGKGKVIPRKNIRVFRKMVVVVTIVVVLLIVASVLLILHFVNNSSSNDKFPFGIGVYTYDVVHKYSHIHDPAIGEQVNVGSNVIPINKVHAPFTQGLFFIDNDTLLESSGLYGASYIREFSLSSGKTKRFNNLKSNLFAEGLAIVIEPMTYRKFILTLTYKEKVILVFDYNTMELYHTFEHELDGYGLTSNIDLLQSVEDLKEENFARYQKLWTTTGDNYLYEIEIPYEFSKTKKLSISGKTPITCAGFAIYHVNELEYHVQAKTLYANVFLTKLILEIDISKGACLKIINLSGLVEKCDNYEGMKNRESVLNGIAIDPQNSKADLPNLLVTGKIWPNMFQIRLVKSISKLEATAALSEYFKSIGKKVP
PKH_126600	Pk	OG4_19172	-	+	metalloendopeptidase, putative	stromal processing peptidase	MIKIDGIILLYLSVLNLVCCLNSNLSKSAYILYTPKSTKRYKAPFRRWNSPQNNNTNELKEDDDLIKYELPNRLTNIIYKKRKNKNKKMYILNNEKHIILPSHKISNEYKNYTNPIDYNYEEMHVYMEVNTGSVNEKKNQQGISHLCEHVSYMGSKNRKNIIDKNIRTNAYTDFHHIVFYISVSLNKELYKENSLAHFQYENVVENVRQDQIEDYDIYTVDEFNYKHAILSNCIDTMVEVLKGETQFNRERIIKEKKAIFSEYSIINTVEYKMNSDIIKTLHKENRLSHRLPIGKLELLKRYEPKDIKKYFDLFFRTENVNLYIYGDVNVDIARKLVSEKFQDIKKEDLTPDDIKYLAILNDNTLRSRNKNLPAIVHMYGADYSVKGEPENGSLNGPDS…
PKH_130030	Pk	OG4_54789	-	+	serine/threonine-protein kinase Nek1, putative	serine threonine-protein kinase	MLFFLFLFLFSFSFVFCFIFLSCFLFCFWFYFFYIYIYFFLFFFFAFFFVFFFFFFFFFLFFLLLVFLIFSITICRMLSLLLPSISNTDDKQRVYMNYGYKFETVLDTLTSNSEIHLIRSLETGEAFISKVYDIYGASENDLNRYMNELHIMQKLENCENVVQVVDFIKQNDSLSLITEFCSQGDLYTHILRRKMKNEMYTEKEIFNIFNQILNGLNSIHKNGITHGDLKSTNIFIKDDKIKIGDFGISQKGSNNNLGTLNFLSYESILFKKTNKLSDLFQVGCILYELATFSSPFSAKTMSDMISFFEDKNYKNYIVKDISNIYSDKLVNIISKLLSLNTLERLEVVTNYNLSRTESMNLEVSNNLQYAIM
PKH_130420	Pk	OG4_43617	+	-	glyoxalase II, putative	hydroxyacylglutathione hydrolase	MKIARAILAINYFSPARTTPRLSLSSRLFFERGFFSRNNMHSTCFTKNDKKYFIVKKPDLCTNVIIVPMYRDNYAYIFYDDKDEGVVVDPSDHNVVNEIAEMENIKIKHVLCTHKHADHNGGNSYFFNKKINVYGIKEKDNKYINRNLQNIQSFEINNFKISTFLSHFHCNNHISYLVENPEKNSSKKKIFFTGDFLFICGLGKNFEGNNLDLRNSVNNLKKLQKDASKIYIFCGHEYTQDNVKFALSVDGVNPQLAAFHQQLLENQNMHPTVPSLLEDELAYNPFLRCDDQYIQNEIKKYAKRNHYVISAKSEYIALLRVMKDNFKG
PKH_130640	Pk	OG4_34333	-	+	hypothetical protein, conserved in Apicomplexan species	conserved plasmodium protein	MTILKILLLFLPLAYSFVLKKKPQWEAQQAQRTKFQLYRTRYFRKFKTMPYIRDSGENHIKELTRERVRLNKRTSNSITLGANFLFICNLDNRLSSKDVTHFFNYFIGNNNCVARIRRNKYTGSRVPHPFCQFPSPLHRASTSSAGRNMGHGILKFQKAEDATLVLLNYQGIKLGEKNIILTEAFKDEHLKQKKHICNVLQPSRS
PKH_130660	Pk	OG4_25876	+	+	blood-stage antigen 41-3, putative	41k blood stage antigen precursor 41-3	MLFRLKFLVPCAVLASSILQIILCEDENMGWPIDYEFNSKTLPSIEVKLSPPENPLPQVAAEIKMLESARLKLEEGMMQKLEDEYNKSLSSSKIKIQDTVEKSLSIFNDPNMLGSVISNSVKTLRRENLRKIPENIPAKNNLKKLQKVNQATSGPLPPPELRKHTSFLEQNYVNRTLPSVKISLSELTEPSVEIKEKMEEMEQYRTDEEVAMFEMALSEFSILTDITILELEKQIQLQLNPFLVDKKVVHRALTKELKELGQREEKQMIKENFQRQTSFIEEGENEDTGNILNVKISQTDYGYPTIDELVMHMQKRRDISEKLERQKILDLQMKLLKAQSEMIKDALHFALSKVIAQYSPVVETMKLESLRML
PKH_131750	Pk	OG4_26765	-	+	histidine-rich knob protein (fragment)	histidine-rich knob protein	MAILKGYSATEKINVPQFLCRTLFFSLLIWFLNCSNYEKCDRRSDQQCELPNGLKSTVSRSLSVVRRMGKYNAPLKTRIVKEVTRGGFIEEKYETKHYTLKENVDENNKDCDEKYEAANYGFREKCPYEVNPYTGATGPNILLLKKRFHQNLKGEEIDDDDDEEAPLTSKLPGSLEACERGCGGRRKRRSKGDDDYPTIVKEYEEVGAQGYKGNPRGRGHPGHQGGPDSPRRRPVKVVEPDSDMMTYKPPARGRGPARMGEHGAQGPSKQHMLKQQPQGNLKKDHWPTGHQGQKEQFNKPNPTVGQYSKPTVSQPPKPTVSQQPKPTVSQPPKPTVSQQPKPTVSQPPKPTVSQPPKPTVSEQAKKEQAKKEQAKKEQAKKEQAKKEQAKKEQAKKEQA…
PKH_132980	Pk	OG4_37510	-	+	conserved Plasmodium protein, unknown function	apicoplast thioredoxin family protein	MIKIFLLFIFQVIAVFVQNVNAILPIGLHLHLVAHFTCHHNCPLPEPRSRQCPLRKVSFAGLMGFSGLSIPLFLATYMIYSKIKGDNRNLTEAEKIMGKFLYKHENNLIQGNNYEEEKSYNLFYLIHAIYNNIRTLINFYMNVKKVSTKDTSNEYTILFFHSYNVDRFLHTRNIKTYAERLKEIYQDINKKKNVNIVYVPLDSKLLFNIKHFSNMNNWYSILFHDKKQILKMIKNYNIMNIPTMVLLDKNMNIINDNINYLLLHQKKDFPYRDVNHLTYINWLYDKNNRKYDFKKLNSDYVLFYFNNEKENKGDLQSLLKIKKKLAAKNINVDIIFVKDMEMMKGNTTSKGDGMVSQKEAEKVGPLAGEKTEGNIPNEKIGNEKDTHESSKKEGQSALS…
PKH_133410	Pk	OG4_13233	-	+	ATP-dependent transporter, putative	assembly atpase	MRRAKWEAVACALVALLNLRKCMGIRHKVRNVVLLKDGEADTVKPLFLLNRIQNRKLQKRNNVTLHMDNTNEDTSRLSLLKNLDDESKVVTQSPEWNEKMPLMEITNLHAMEVEGGKEILKGINLTIYLGEKHTIMGRNGSGKSTLAKVIAGHPYYKVTSGSIKFKGLNLDELPVNVRSLCGIFLAFQYPVELPMVKNNEFLRAALNSHRRQRNEPEISATEFDLLMIEEIKKVGLSPEFLDRPVNYGFSGGEKKRNEILQMLILKPSFCILDETDSGLDVDSFKLTSNVITNFSNEKNSFLIVTHYKKLLELLRPNFIHIMHQGKIIESGDYSLVDKIETKGYAQFLKDS
PKH_133610	Pk	OG4_30729	-	-	conserved Plasmodium protein, unknown function	hypothetical protein, conserved in Plasmodium species [Plasmodium knowlesi strain H]	MQITNLFVCNIRNRRELRKLARIQKKEKKLLFSKRKKNSRGRNIPTINNPDESLEVRPTKQDKGNSKRKRNYSEGNNLNAPPKKQKKILNSKIKYDISAEQEKDNQLLSYLSKKLKINNKDDGKNNEEKIFKQLEKDGFDSNLLKLTDIIFGEFQKSYKKKCKKKGNNALREEDDTVGRSSEEERVLSEDQDDAPSEEDTEKKEKKKVKKKKLSKKKTHTEISESGEEEDAENAGGVHPPRGKVSERKKKPKAEKKKKKKALNYPEEAKKIEKFLMVSLNKTSEFNIKSIIQDLCKYFHDLDDLKLKVMFNDSITKITRNHFNHVNATDIHICICVVIICVLNNLVYQNLLKDFLKALTRTLKQLCEDNRDLMRKVERENELSGVVNRNHDNLHDSNEN…
PKH_134140	Pk	OG4_10840	+	-	conserved Plasmodium protein, unknown function	cobw domain-containing protein	MIGITIITGFLGAGKTTLLKNLLKQSRQNGKKIAIIHNEFTENNNNIDKIVFKDINDIYNFPKEDGGADRRVRKGTNDLNNEWKNDGHSDGESDQNDITIVNRIEKEEGYIYELNNGCLCCSNKSNFVKLIENILSMKTTYDYIFVEVAGVYDNIQLNNLLWLDELNKSQIYLDSIIYLLDAYNFVNSFQGGDLFHGHGALAEAASRFASIQIQKEESLPSEEEEEKEKRREGNMNPPPKDTSPNEQLIVCDVVIINKIDKISEQEKEKIKTFVSNMNPLSQIYLTSYATLPMVQLTELKCYEKKNIKDILANSLSSHTADRKDVFHYNDFVNCSLHYEHNIPYLVHLGEQLNRMKSEFVKNTSKNTLRQILSLKKKNIFSFRKINETLVSLLWGKNLE…
PKH_140260	Pk	OG4_10845	+	+	DNA ligase 1, putative	dna ligase 1	MKLLVLFLIARMLLCKVYSCMRREYSYIIPFMQKNKFYRRKTNFNVKVFTNFRDSASNRRSGFLKCLSFPKKTMEGKNEETDIKEESKVKEEGKESTKRKIASDGNTKTKKAKAKSENDVKKGSLFNCTVKEDDKVSDLTSPKFNPVHFDVSNLYLSQKDKEKHKFKDSLLFTFLTNTFNQIEELKGSGTGSKKNVAIILSNVFRVLIYYSPNDLIPAVYITLNKVAPDYLNVEAGVGEALILKTMSEAYSRTESSIKKDLQQIEDLGIIAESCSCKMRTIFPLPRLTIQSVFNELKSIPNLSGSNSQQKKREVIKKLLVSAKTSEAKYIVRFLQQRLRIGVNSATVLQALSYAFILTRPFIPEEIVQKGKLMNEQLLSVKGSGSGEEDDNVSDSTMEN…
PKH_141460	Pk	OG4_23238	+	-	hypothetical protein, conserved in Apicomplexan species	wd g-beta repeat domain containing protein	MRGNYLRDGYKNQYRYANGSDGNNKMQNNYNNRRNFYQKKNPNKDRDKGITFCPHYTLRGLCRFSDDCKNLHNLKLVDTFFLQRSYIDCAIIVHGPNNEIYLFTSVAPYTINVWIFVPGEGSKELDIKHLKKIEFELTPEEEEYGDDKTKGNKKMKKRKKRVLSLLYAEECIFAGLDNGLIKIMHLPSSDSSTLYAHTDSIYSIVCIDGIIISSSINGEVKFWKYQESYLSFVTIKKIETKTKIFKMIEIISSKCASGNINSNSNSEENKFNRTLWLCGDNITIINLLNLEIVNVVKCKYGSVVSVMQYEANVITAMSEGKILAFSLKGDNHFEMNTLPIFCMAGLTNHKNVPILIYGSTKALYTFSLPEFNPYGYLKDRESMALKFNINDPDFILPLS…
PKH_141870	Pk	OG4_54833	+	-	conserved Plasmodium protein, unknown function	hypothetical protein, conserved in Plasmodium species [Plasmodium knowlesi strain H]	MERNILSKYKSFFSFVNTVKNKAEKEKALRYSQHLYLKNISRSNYNVKNNVDQIYDNKLFLKYWMRKKRPGARN
PKH_141910	Pk	OG4_17513	+	+	ATP-dependent Clp protease adaptor protein, putative	atp-dependent clp protease adaptor protein	MCGFQKALFFTLLCIFLCKRSTFSCRKRYATRQWKFISASTTVGDHSGSISRCVFKAPKLKGRKKLIQAQDNSNLEKIKKLRNVVKEIKKDNIKEFYSEEKQKREKETTAWKVILYNDDIHNFTYVTDVIVKVIGQISKAKAHTITVEAHSTGQALILSTWRTQAEKYCEELQKNGLTVSIIHESQLKEKKKDSNAGS
PKH_142170	Pk	OG4_54825	+	-	calmodulin, putative	myosin ii light chain	MEYEGETFHLTEYQIKKTVKAFNYLDKKKRGLLKFNLLGSLLRCSGYNVSLKEIDKIKEKIIENKTLEKNAQVNEKRETEITTNENDGNNNSSNRKQAKKTKEDNDGDDHDDDNNISKMLSDLKNYDNFIELEKQKEEKKKKEEENKNLFSIKEFFRIIQLPNITNETKPSNVLNSFEIFDEKGNGRISIKKLRFILQYLGEPLSNADFDEFFDWIKTVSAPAEGCVEMNYSLGRYILYCVITTSPCYTLHAI
PKH_142470	Pk	OG4_30117	-	+	ABC transporter, putative	abc atp-binding protein	MFVELLLCLLTWCYVHRCRGLQISKYKNQISFLNNLHVANAARDYHVYHLKKEALGGRGPLCVGGQMRGQALLGVRRDDEDDDDEEEDELNDDDEEDEEDEEEDDEDEDDNDDDDDDEADDITREERLAAYEKLLNAEGDEEDRMLSPKYNMNIYNILEKHYEQKEQSKVILTVHNLNYEIGSKRLMTNLNFQVNKSECVGLIGNNGCGKTSLLNLIFDHSDNSHKSININNSVSKEGVTNFNLTEENMQAMVKKNKFDFLYKILHHMKMNSLDLSKLPSIIKNRDVSYFEKINKKKSGNSNDLFFKNGIFYFKQNIHLLEKNNLTVFEKVLKFYQPVLEKYEVLNYIEREISLYRNVQVVQKSNRCQTEEDSEKYPTSDSLNGNNIPPKRRSYTTKEH…
PKH_144260	Pk	OG4_10560	+	-	ubiquitin-activating enzyme e1, putative	ubiquitin-activating enzyme	MQQKNPPLKKQRTYESVNVEEMEGKRENLEGCNLVPKKENGEIDADLYSRQLGTYGFELMNKLIKLNILIVNVKSVGLECAKNLVLSGPKSVCIYDNELCQVSDVGVNFYIDEEDVANKVTRSDAVIKKLKELNRYVHIYNYKGELDENFLQSFDVVVCCDVAHSHLVKYSKMVRNISSPNRKIAFLCCNIYGLCGYLFVDFGKGFVCYDKDGENTKSCNISKISKATEGVVSFDFDKGAPFQKGDYIKFANVEGMTQINNKIYKINDMQKYTFTIGDTSQFDEYLKGGECTQVKSHLRMNFQPYDIVCAKPLAWDEVSTEQVGMQNSPTVFEGETIYEEVPPPQSFLISDYAKCDMSNQLHYAIQALKKYEEENNNVLPQNSEEEAFEKVFQIAVHLN…
PKH_145500	Pk	OG4_44949	-	+	hypothetical protein, conserved in Apicomplexan species	conserved plasmodium protein	MSPLLVPFLLLFRLLFFPQSVSIDDGLFTSRVLNPFHYQREKMRIMKHVNSLAFLYNEFKNNVEDLEKTYDNFLKALKVSKETEERLLKMNDLKTANFISEMEDLKNEYDVFKDSIEENLNKKKEEFKKTLKISIDGFFKNSIKELKGITKYINYINLNATNLHKLVSSIFSKAMNLSDIYEQNINHIYEIGKEYYRIKLSSLNNQLISEYEEYNKTLGFVSNEKYLEKFSDIFYIEMIKNYLKKSTHKTVMIDLSNILERHSFHELSYFFNIFLKNFEKGVIIYVINRVDTNYHNKKMIFIEYFKLYELVQYIKSNYNHLKVDFIEIHVFNMYISFFVNANGILYHVNYEYFLDANSINLYNAHNYGYFFTNQKIPDEASSWSKNYGKTPLNNSHQVS…
PKH_146330	Pk	OG4_48195	+	+	conserved Plasmodium protein, unknown function	vacuolar sorting receptor	MWGRLSSRRVLSAWAVLFLLGGELVGSPKSFAEGILRILPAKDSIDGILVHLPYKFIKHRVYSRGIYLHGNFDNLDSVINLVEMQKKITNLHCNLRKEKGEFIRGGTTHGGTSKGNDTDGKTDHGQTDHRQTDHRETDQRETDDGETYDRGDVLITNNCVLFVDIKYKDNLKNIFPFMDYLYKHTSATALVFLCDNFLYDNELYNPHEDLNTTILHSSVLTYLVPYDSMISYQQKDQYHKYTFELYWGFSKKTDIVHINYHLDLGKYFNYTFFHYMKNFLLDLKEHITYEIHFSIHKNFTIDPRFCFIRDSSYCISKPDYMNSNVVREVVEQQVRSLCVYHLTATEEHVPGEYVATYAPKKRFSEKFIQYINALFDFEFEKNLCSNGSNDLSKKCSNII…
PKH_146680	Pk	OG4_11463	-	+	cutA homologue, putative	1 divalent ion tolerance protein	MRAVTFLTMLISLAAATTKRCHNKLLHSLFVNNSTKQGLLNKVFLGRGRRNSSCARSFFGSKMEESTDFIAVYVTAPGTDVAEKISNVLLEDKLASCVNIIPGVLSLYHWKGEIARDNEVLMMIKTKKNLFSKIVDAVKANHPYEVPEVISVPIHQGSKDYLDWISKSVKSPSEGDKKNT
PKH_146940	Pk	OG4_10943	-	+	tryptophanyl-tRNA synthetase, putative	tryptophanyl-trna synthetase	MRSARVLILCLLILAQIDLYAYAKMVRKGGCTSFLSKIPQVKRTKLKVKLKRECTYLTGIKPSGNIHLGNYIGCLNPIINLEAKRNTHFKRSKTKKTVKIHKIILIADLHSLTSLDNLPTLRKNVVDSVNTILSLIIDMYVKKKKYIQVFINNVKLEHLLKWGNMNRILNEEVFQQLSRRSTSRDYQFYSFLKNLSGCEYSYFKHHNELSHQQNIPSTDEDTPFNLQLQRNNQENQRTNFQNKIKQKHYFSIFRQSDIAQHTSLYYLINSFTSVNMLNKHVHVKNVSKNKSVALLSYPNLMLADILLYKPDYLIVGVDQKKNIEVMKTISKKINSYFPHMIGLPKIFLSKFYVQIMNLDGQQKMSKHDHDDLSGNDNNSHNIIYLFDEKQIIEDKIKKS…
PVX_000715	Pv	OG4_23773	-	+	hypothetical protein, conserved	ribosome biogenesis gtp-binding protein	MALTFLLLLVCVTRGALGIHVPQPNVARPNVERPHVAQPNVERPHVTTITQSAHTRRVGKLLFLSPPSNPRRAHLHPNRVQNKRETNPEEQHPPTFDEYFNKRAEEDYTKLEAEKLKIMRESVSSYRGEIRKVLERSYKSEYEKLLREEKEDEEVSGQVHENLKITFLMKESINNFLFTRYSYMINRLKEQSAILRGLRGGAKQGEAKEGETKEGEVKGDSQLGDSKVDDFKTRDFQPGDFQPGDFQPGMMAQSVQFFRPQTGSSRGSGAGARNCPTFSDQIFANAKLLLGTKGDAPVGSSFPLEREQQQNEQKERKEAIGEEDNPMTGSPTEELENEQKLFPRSNVSALDLFKHNVNAFLSYKRENIIKENLHENLLYGRVKVHWFPKFMKRVITKLS…
PVX_000745	Pv	OG4_42735	-	+	hypothetical protein, conserved	hypothetical protein [Plasmodium vivax SaI-1]	MLNKVVWLVAPLYLRATYGGDVYEDFSPTAPHEGDRHSSHPRVLTECISSKYNDGGRRRHPSGGLTGIPEGCLSELDQNDEDGGEGPSAGTPPKDGQEREQQREQGEQEREQERDQEGDQEGDQEGDQEGDQEGDQEGDQENRQVNRQVNRQVNRQQNRQESRLPSGRLSSYGGGPPDARECRKQILKGGENHACKKKPKENVATPSTDEAVLNKNKFRQDFLNFYYALIGKGINRSKADVKAAKNKLDGGCEKKCKEKPKVYPKAKSSLLDECCVKNKENSQNPLTVSKEEGGLRNGVFEPEEKHARRKRGPQKSHLAMPNGGSVGGVGSVGGVSGVGSVGSISSFSGLGSPNSVSSVGSISSLDSVSNLSSVSSVDSSGVSVGGSLSSVDSSVISLG…
PVX_000800	Pv	OG4_41741	-	+	hypothetical protein, conserved	o-sialoglycoprotein endopeptidase	MKNAIKNLATCLSCVLSLLRYVHYAYRIDNITIKKTQFSDALERTVHKINKRVQKDRAVYYDVCKYKKIPKILTERNKPKNNQKVKYIVGIENTCDDTCICVLDSNLNIVKNVIISHFKVVHKYEGVYPFFISSINQLFLKPYVEKALEGIDQSRISCFAFSACPGIAKSMEAAKNYIGERKKQNESIRVSPINHVFAHVLSPLFFHVYNDENTYTNSGQYKGGKSDQSRNERSIDMHISEEVRKDKAQMEKVKDILQILNSNDVTKRKMALLSEEEFLNCGDYVLRGEMGSEAVKNMDGEAPQDVNKEAPQNVSYKRENTSSAHKPQYSGEAPQGSRLTDGYLCALVSGGSTQIFKVQRNKKNEINLSKLAQTVDISIGDIIDKIARLLGLPVGLGGG…
PVX_000975	Pv	OG4_29314	-	+	hypothetical protein, conserved	fimbriae-associated protein fap1	MWDTACLKRVTLISFFLIAVEYLEYFSIKKGHRNERTSSFAEPQSTALRLYLGGPPHEPKMLTSCPAGLPLRSSSSGSSGRSSGSSSSSSSSCGAPQNCPKEVAPSAHGHTERHKKKDSKIGTPDHSNVTLYCDGVTFSGGESCAKPFASGPVGAKNNNCACSDKHNFFKKEKEKNALVSGGNFAKRIISLFYKLLDECAQVKCKLTSMLEVFLATGGTHRSDFFPQGKPTDSGAYTFMDEDKIYSHFFYPSYVLSRNGYLTTDGELFPFHYTHSELGQMIGSEGITNGGVTLEEWLEGGTYQKDYKSIWDKMRCKFDPLGRGIIRGMPPKMSGRRLSDKRPLIVEGNGDGGGDKRRGDAHRDGKDKVDRHTGDKHKDDKDPKKTPPLHNGYAMTYPLE…
PVX_001710	Pv	OG4_118796	-	+	Phist protein (Pf-fam-b)	phist protein (pf-fam-b)	MKFRFRPKCASGSGEGFTPSRLLPLLKVILLALFYVLLQDEQPSEGAPGGKTPRVVTYRMMSHRIRTYRLRSHRMRNLDDVSRKGIRGCMDAETIQWVKNEYGLSQKLKEKNGESDDESSEAVNGAVLSMSKLGPKYLKKLVGELYYNKINDLPKNIKANDLFSIWNDIYCLEKNEFSTVEEELWLACCQLAAERKIPQKKKINEWLKVYKSLSHDLMKKELNDFNDLLIFMDNGSFTKLDFTLFVYYKSISWRTFKKTLFKRWRSVLVRNLDACRR
PVX_001780	Pv	OG4_23359	-	+	hypothetical protein, conserved	erythrocyte membrane-associated antigen	MDLRHVKCRGWFVLPLLLPLLLPLLLRGEGKWHGGMHLGVAREDDHMSSWDDHPGEDTPRVYNLGNVKCEQLEEETYGGGLLGSPKGETNPSGMNTVQWITWKGKRDGGEAAPLGGGPPYSCVDMLPSRHKVTKRMLSSVMGDHLEVPTSGGHSPDGSFQGSVLNVHFTENKNLYTNVKVGGQPLKLALNSRVEGIYVFMKDSQACHVDEEGEEKNRVCYDPNTSRNSTWCNNDLLCLPAILSKSYECYSDSNLLLENKAEYPSMYYDSLKFTESHVEGSDDVEVLDLVKAAGAEKAAGEGDAAGGGDAAGGGDAAGGGEEVGYANAAGGETDATFQNTDVKLVTDLSLYKGWSLFKDTDGMMGLAGRELSCRNVSAWNTIVEKSNSLYALDVNLPEGS…
PVX_001805	Pv	OG4_38616	-	+	hypothetical protein, conserved	conserved plasmodium protein	MRLAQRVGRCLWGSGPTSGAVGRAVGREVGREVGREAGRAVGREAGRAVGREAGRAVGREAGRAVGREAGRAVGREVGGVVAGAVGSLPPNRCYRLTRRGMHSAKTQGDAESGIVEKLMNMPGESVSYAIKKSVKNGFISKRMFNVYDGLVKRHCRGFTFSDVVLTLQAYALCKQRNFEVYSILSSRALRLLRGVEAVEEEAAREKREDDQCGERDGGSREGGEAYDPERHNNIYRYILASNQLNYSDFELMQLLVGEIKRHFHRYEMKRLCSLLHALTKLKINDAELLDGACHHIVGNFKEVRCNHVNHLISAYSPKTSGGNHEELLLRLVKFICENVKAMDSISVYNTLVQIGPILQRLSRRGGGEVGEEEAPRRGEVDENRNNDDEQEYCHLAKST…
PVX_001855	Pv	OG4_10833	-	+	tRNA methyl transferase, putative	trna methyl transferase	MTLRLLLLSILSTPLLRSERVERGVGGRSLPVAVVPSMNGKGAPRGRTPKWSTPKCYIMKGALRRRLSRGETSPSTSKLNERAVTPLSSEQCRGDETKRNERYEARIRNVCEELRRMTDREDKMKHLMEHLVKENTNGWAVSFGEPVVRKSFTLRGKSKRGSAGRNCFVNEVRAGVSYRYVERCNSNLFLGVDVVEAGKEAICNASGDASCPPTEQAAPPSGHSLDGPHWRSILGGKKFWITVDGFSDNIVLRCFLRVLLEGLKDLDLERFLSMGFEGVVSELSSLYTIHVNGERIVGHVLRRVERSLGRLRGGAANGGVANGGAANGGAANGGLANHVMSNHLIGRRPPRRNMRIQQYPRVAHMLSGGVDSLMALRLLERKKFYVHNFYLHFAHQDCS…
PVX_001910	Pv	OG4_27903	-	+	hypothetical protein, conserved	conserved plasmodium protein	MSPVPRAARQLLWLLLWLLVWVLTGKGPCVRSFTLQRGLQGSVHPWGGRKKGPTPRVGRALQRPVTALRSTEELDDYKYFTDDEYIPPLPPVETWEELLMKEEIRNRAEDEQRGADDYTLTHESRQKVLDIMRQTRLINHCNYEAQRNRQKNVLYFVTPKQGPYCKLMEGDKEKMESLSSKVKEKFGSKVQIVNLKMDVKMPLFEIFLQANIHTQIKIFHARGRTLQYRLPPPFWTKCKLLKENKLLQEKYGGECAPGLFPRYDEYQMMEMMTECVFSDKYNYYVYDVNLEWENLCALTPENRELRKMVHQSVHVPTRLAVIKAFEEGIADFRDVIHEEHLMMLREQRKMKENRRYDF
PVX_002580	Pv	OG4_11573	-	+	pseudouridine synthetase, putative	pseudouridine synthase	MNISRRSHVWLGRLFASILILPHLQLLPRLSRPPLLPLLPLLPLLSLLNHVSSFDLTPTRSTIAAGEVPIVRLNKIISLEKKMSRRKSDQFIKDGNVKLNNKIVKNPGTHIDVKKDKIKICGKTVNILKTQKMISPNDSSMYKWFVLHKPKGLLCTSDDEKERASIYSLFPQDILDNYRLVSVGRLDRNTSGVLLLTNEYAWVNKLTHPKYQRIRTYRVHIEGAAQMKVLRELAAGVYLPDDDRGGKVKKGMQKGMQKGMQKGMQKGMQKGVPKGIQKGFPTGMQKGFPTQPAFIEILRQETIKVKDQVKRVSVLNISVREGRNRQIRKMFEQINQPVIKIKRTAFENITLKDVFFPKQYRELTPREVSDLKARRF
PVX_002625	Pv	OG4_11835	-	+	rRNA methylase, putative	rrna methylase	MRTKLPACVVLLLLSGEEVTPFGVLPEFRPNLPPRRANGRPKTTHSLSPPHRHDQADTPSVNIKRNKFLDAQAEHDLDYVYGINSVSSVLVKNERTIHSVLVNQHIRLNKKTRKQAYRYIFDTLKERGIPIRTTSKRKMDDLVGGFPHNDIIMQTSYRTMKRAKHFLKDYPQKGKQKSIYICLHDVYDNMNIGNICRSIFFFGGDSIFLKKKKKKKKLQEKLLQMKIDTPVLHSSVGTSEFLDFFHVNDMLSFMDDLKSCGFKILSTCCRLDNSSTNDRLQELANVRLSKNEKAFIILGNETKGLSKEILDRSDACIYISGHHTEEASTPALNSNGNFTLDSLNVNNACAILLHHFASHLA
PVX_002935	Pv	OG4_54817	-	-	hypothetical protein, conserved	conserved plasmodium protein	MISGRVGMLLFKRRFSQAGKSTLDLKKSLLYQDDDYLVVDKAYGVSTFGRAPQKESIIKSLQGLNLEEPEDANVVYKLHNHVGGCLLICKNKFIKNHTYGNTFLALVYGKVEKAQNVEVKLGLKYLPNSTVMVPSNGQEHLRDLKTIRYNVVSNSIWYETHNFSLLKIDSTAKDARFIKPLLFYSLYTCIVGDTEYVGGWKKLRENGFFSYRDVGGQVERANRLLLKRVSKRVSPGGKNNELMLHLHCSGVTFQSACSRVVYVASPLPRHMRETLNLLGAPSLCQTIDTQVKAANECSRRVGKTLSSVSHERESDVRDDRLAQNGKRFEKGEGEDDPLLYDLMQDEGRIERENEELLSGIYRRGEIHRRGERSAGGQGRRGQPRPRRGALAKDVHRLTP…
PVX_079740	Pv	OG4_41653	-	+	hypothetical protein, conserved	extracellular membrane associated protein with a signal an egf domain followed by 10 transmembrane domains	MKGNFARLVFLIYWSLPPPLSASIFCNYGEYFKNGKCYPCEEDTYSSYRNAESCFSCPPGSFNNKKSSKYIYDCSCDGDFYLNYVGNRCDMCSDLGNRFYCKRDLTELYVDNLDAFFKHKDEITVNYFDRCVVKENKMNVYPFMNNLYLFCKSPNVCLDTCGRCSENNEGFMCNNCVQSYDKNIFLKYGTCRKCFHVIFVLLQMAVYLILSFAFFLVLFKCINVSLYFYQIDVYKKGSIYFLHYFREFIFYASLILLLSFSNDLTETEGENYTFYGGEQKEGQPHLHSGDAKLHYLLNIYLHNAFFDIIKIVHLNFLHFLKLGCLHVGSNRSKIYSIQIVTLLGGVLIFICFTVVCNLIFLYLRNGGLNVVADRTGEGEADWVSKDQTDGCKKNVARKF…
PVX_079795	Pv	OG4_27861	-	+	hypothetical protein, conserved	hypothetical protein, conserved in Plasmodium species [Plasmodium knowlesi strain H]	MFFPPPFRTISIVSVCVFFLTLFLSPLFVRHNDNTVGGVALKNGHHSTQLTSQDATPMICRAFHFTQNKRLAGTRRRRKRHALSFLNLEKKKLPHLLCFHSEDCEYCNSMEKLLTKLKEEEGVNFLKLEMYENSYNFELLQQLDYDNLCGGLPYYYNLKTHYNICGATTYHNLRNWALDKKCNPNEPPTEEF
PVX_080055	Pv	OG4_30692	+	-	hypothetical protein, conserved	hypothetical protein [Plasmodium vivax SaI-1]	MKNRLKRIFIYIKSNLNNISSIASIICLLDCVLIPFITVVISIFNVVNGSENGEAQVEDHHQSHHHGWHEIVEKIALYVMTPIISFTTIYNFVQLKNFPLLLTTLIGITMFVLSHAHIEFSSPSVANIFKKMHIPMAILAAIFLVSTNYAAHQLLKSRNMDRCCKHKKISHHLEEQSCEQHHHHPQHPHHHHHYDLEMNDDTYGMHSHPHNNDNVVNLEKFYNIGFHQHNDHELVRFL
PVX_081370	Pv	OG4_37696	-	+	hypothetical protein, conserved	hypothetical protein [Plasmodium vivax SaI-1]	MKRFVLRCPGSLHRLARSGGPAASSAAGTLGTSGKSITSGKSITSGTSSTWGADLRRGGIHTKAVKEAPPPEEEADERVMAQNREAVIQRYRQFVEARRGEVTGRGQMKGQGKDHVWRASEVGANVAANVAANVAANVAADVAAAPASEATPPTDQKYVILKKQISKEFIHQVFLPHVESQIMHHLKTYTPSQIVSIFHIYSYLYYFDRKKEMVEALLEYLQYRLDCFSVQDVLLVLEPLYLLNRTKNFNIYRLIINHLQKIKGQMNLCNYIGVSRVFTKILIDLTFEEKELEGKNILSRLWYHLKQSKFRRGIPPEQRKIPNWEFLVGFMADVVGHVEGQLRLLSAIELTDLLSVMANYSLRSGHSRYDVTPLGGSGEGGGVVSGEGSAEGSAEESAE…
PVX_081500	Pv	OG4_11290	+	-	hypothetical protein, conserved	adenylyl cyclase associated protein	MASEGAVKLKDNQWDVSNYKNEKLVTLDQVEVNNAVNIYHCEGSTFVIENEKFKSLAMHKCVKCNVVLKNLISSIEIISSSKAKVQVLGKCSSISIDKSTGVQIYLSKENSESEFTTALSSEMNVHLENENGEWTEITIPEQFQHRLANGKLLTRVSDLYSF
PVX_081640	Pv	OG4_54909	-	+	hypothetical protein, conserved	hypothetical protein, conserved in Plasmodium species [Plasmodium knowlesi strain H]	MRNYLLGLPLLLFLSTCQSYILQWGKNQSVSVPIRCKQRRREGTPPRAVRSYMKRLRNATVEIDIENRKDLSKLEIIKMFLKGVKECKNVERLREKAKGHVPPSTKRKLMKQRRMANLRAHVKNCRIRKQEEVPPEKNILNFPKNQIKNINAAVLYFRHYFERYEENTN
PVX_081665	Pv	OG4_10425	+	-	cysteine desulfurase, mitochondrial precursor, putative	cysteine desulfurase	MKLLRFVKHLNIPRGSALEKLCKCDKTSRGFKALTNACTSRGSTSEHNHNPLHDRGGGCVRRRRFHSSRGEIPKGGDSVGKKNEPSGDNHSESAPPPVDDVANEREKKKINRFYLDSQATTMIDPRVLDKMLPYMTYIYGNAHSRNHFFGWESEKAVEDARKNILHLINGKNNKEIIFTSGATESNNLALIGICTYYNKRDSKKNHIITSQIEHKCILQTCRYLQTKGFEVTYLKPEPNGIVRLEDIEKSIKESTIMASFIYVNNEIGVIQDIEKIGLLCKERNVIFHSDASQAVGKIPIDVQKMNIDLLSISGHKLYGPKGIGALYIKRKKPNIRLNALIHGGGQERGLRSGTLPTHLIVGLGEAANLGSIEMNRDHKKMKFFFHYVKDHLMENLDYI…
PVX_082445	Pv	OG4_48337	-	+	hypothetical protein, conserved	hypothetical protein, conserved in Plasmodium species [Plasmodium knowlesi strain H]	MTRRNVGLAAKCLAILFTCFFSPSECKGGGRQTFFLSHLVGNTKRGGKTCPRGVGRGLMGGASRARATTRWRSSHLDFSQTGGDGRAEGRCAGGVLHGVRARSTAAPMSSPFTTRLGSSSAPPLRARKIDQKEIKRRKNYQYALKHKYDRSGRRIKDINKEKKSLKKKKLFDYEGFKVDRIFACLSEEDMQELRDEELKRKSGEILHNNKYIDTYGVESETDLDDV
PVX_082475	Pv	OG4_12526	-	+	hypothetical protein, conserved	gpi transamidase subunit pig-	MQRRGGPPPANGAHKPRHWHLAATLLCCLLVRIATFYLTHILQGSEYTYIHQLISLEGEGTPHGGPHKRGRLSHPGEETRYFPFNQSNETKELQEYFQRNKRSGNLKQKQKEKIKINPKQFLIKNDSMHYAFNSDVYNLKYLYESDVLGRLSADVYSSLTVRVNPLLLKALQFALLRGGGGSGSGSGERGERGERGGRASSRASSRATSRAAPPLNTPELRFFLLICAVDLLVGVLLFLIAQRLAEWGAYFRYVNQDRSGARQLQDERSLQNMSDERNLPYALPLQWKLIDPILLTNLYLNNPLTVLANSFLSLDNLKLLLITASFYLALRRIRSEASPPHKSTPNLIAILLVNAMLLYATSFHFILILIGVNNFVVYSHQGILFKHKLKVPLGSLHML…
PVX_082560	Pv	OG4_12949	-	+	apurinic/apyrimidinic endonuclease Apn1, putative	apurinic apyrimidinic endonuclease apn1	MFVFPPSLLWMLLANALRGIKKQQNAVNRLGFVPPWGKGSLEKFPRGGANRRVGGILEGVGTPQRRFLFRLNVFKAKGDPQGKPYYPVELLQRGPSQGMKGTKGEKKTVKQEGAKQEEEEKKDGAPTSKKKINKKEKNNAVKKEQAEGKKTKKEKKNSAQTGETPKGRDKPVAVYPPIPKSLDDRWNDFRTIEKYTEITNVYLGAHISAGGGVQNAPTNCFNVAGQAFALFLKNQRKWESPSLSPESIKQFEQNCKAYKLDAKYILPHGSYLINLANPDGEKREKSYLSFLDDVRRCEQLNIPLYNFHPGSTTGMCSLEEGIKNVADCINRVHKETSNVVIVLENSAGQKNSVGSKFEDLKNIISLIEDKSRIGVCLDTCHTFAAGYDIRSYNGFDLVM…
PVX_082765	Pv	OG4_48442	-	+	hypothetical protein	hypothetical protein [Plasmodium vivax SaI-1]	MGLKKCVIFFAFFNFISYVKKEGNDSCLCHPIPFPMPQPEPDYMDEPAPALEPEAQPQANPDDGNTNNNFFNFYNNGNFNGGNDDGDDDDDDDDDEIIDNSNDDNNDDEDIDNDDDDDDEEINENEKKNNQNKRKRNNL
PVX_082860	Pv	OG4_34299	-	+	hypothetical protein, conserved	hypothetical protein [Plasmodium vivax SaI-1]	MFSCQIEGRTFCKILSLFFHAFFFLPLCYGFAVPYGDRSLIPRGGWKKRSSRCGVNNIRTSKISEKKGQRLYSIKITHLTENKIPEEYFKYNLPPEPIYPYITVPDNLYTRQTKDEQPDGENPPSGANQLEGEKYPDNATEVGKMSSEEFTKWNEKKIKKMKALPEPTIEDYIEDTNFSKYVHPCLVKKVSAKDRQKVHHSLLSLIDPRVEFAIVDCFDERDEENDLTEYDATFRGIAPWPSTDELRRNENDFQFEKTDLELEYNITYDKAGYRAFREKLLSEGEATTAVDEATTAVDEATAAAKEATNGGDPPGDQPTAKAPPAVSVEDIRRLYFKKEIKTLREAKEEMVKWAERKTYSRSTWTLTEEEVKLLPERFRRLYWEKRREKLEQHREAKRR…
PVX_082880	Pv	OG4_22103	-	+	protein kinase, putative	protein kinase	MKLFPHILYISILCGVITVVNRFHPPLVHLLHDLTILRAFRSSASPSEWDERIEWPEFNPAHLFHLLFLKNWLTVPRWKASSPFSDTPEEEGGEGVATLFNKVAPLLGNIAAVWGTLQKSCFHPRWGFPPNAELLPQGARTKVSAFVKKICKYVCLAVKGPTGWGMSPLPLGGLFGVTFAQARGMEELPRESGAHPAGMKRGGKHGHSPSEGSPIGNSPFGEPPREGPAKRRDLLNDKYLLTKKIKDVFRKTRGSSLHELDVIFMPRAALEQGVAADQTCTNCMVNADHSLYALRLRSDKFGEGPTKSIYGSNPSEVQIYYHYDYEQKEYIGDITSSEVDRGEIGKRKPPSEGKFSPRMAWLKGTYKMIDFAKRLFLSHVEKTDSELRRGLRRYEAKKL…
PVX_082955	Pv	OG4_11909	+	+	hypothetical protein, conserved	apoptosis-regulating basic	MSKAKSFFHNVKSNAFSIMFWAPLANWGFVLAGCNDLKKLPMFVSEKMTAVLAVYSILFMRYSLAIKPKNYLLFSCHATNTVVQSVLLFRKLKYEAESKKALQHV
PVX_082960	Pv	OG4_10180	-	+	phosphate transporter, putative	phosphate transporter	MVTTPDMLWLVIASGVACFFMAFVTGANDIANTFSTSIGSKALTIKKALIIAFFFEALGASLLGGTVTDSIRSKIINFEAFYDAPEFLMLGMFCALMGATMWLAIATCLGLPVSTTHSIIGALLGFGLAAGHSKSIKWEKIHSIVISWFAAPILAGSCSAVAFTLLRHLILRRRNSFQIIKRSYWFLIFLITLPFSVFLVFQNPIVLNLECRMKKDKQIVTTSPCYIQDWSAANPFYSTIACLVLSSILTCIGSIIIYVVYNERLKNFSFRKNLFGDDMMNDLEKNGKDANNNTICNVNNSSLNSVASNETQVTQPKGGAGAAQQQGGSGATAGVAAPAGEALPHCEKRKNQAEQNYQTVINMKNMEEKNELLEKKKSGNLGRAGSSINSGSNNANSNI…
PVX_083025	Pv	OG4_54960	-	+	sporozoite microneme protein, putative	sporozoite microneme protein	MELFTSLLFLLIALRCALSFEERDVLSHVDKFSVSEYIRKDNDADHGKLQATEYFEKIAEDFSDDINAAKEALQNMFLDVEASFEELSDDVAKSVSQYSYDAEEKLNILEGLVNEFVENSKGVIFNSPEEKKKMEKHKFKKMCDIILEKVKTVVELSTINNYRIILKFGKGERKSEVIDKVKNDDNISDELKSELLKYEDVESKDANVSGLINFISPIYDSFEQKLNALIREVSADLGKII
PVX_083205	Pv	OG4_10575	-	-	protein transport protein Sec61 alpha subunit (Pfsec61), putative	protein transport protein sec61 alpha subunit	MVRFLNLIKPVMFLLPEVQSPDRKLPFKEKLLWTAVSLFVFLICCQIPLYGIVTSKSSDPFYWMRVILASNRGTLMELGISPIVTSGMVMQLLAGSKIIDVDQSLKEDRTLFQGAQKLLGLLITLGEAIAYVISGIYGNISEIGTGHAIIIILQLFFAGVVVILLDELLQKGYGLGSGISLFIATNICETIMWKSFSPTTINTDKGIEFEGAIISLVYCLFTESNKISALKKAFYRTHAPNVTNLLATILVFLIVIYLQGFRVDLSVKYQSVRGQQGTYPIKLFYTSNIPIILQTALVSNLYFFSQILYKRFKDSILVNILGQWQEVESSGTSIPIGGIAYYISPPNSFADITNDPFHTLVYISFVLVACAFFSKTWIEVSGSSAKDVAKQLRDQQIGM…
PVX_083275	Pv	OG4_42862	+	+	hypothetical protein	hypothetical protein [Plasmodium vivax SaI-1]	MKTNASVVFCLAVTLFGACGLGAAKTLVESEVKGHLSDFLFLNNSQKFCEGGSILQALNTEKLLNLNSVLDICASQKECDFFSYSPKRILRNSLFYEDENELKNTGANWVCSGEKWVISRPRKYWITAIKEDHIKEQVKNFNLSLNMTGECDDEHVLMRISKDVTPKEAAAECNKMADCKFIVFNYNRRLGGEETQVDRAVLCSVPPKGRKNKMGFLIAGKDHEGVPHAAKKKERIRKATSPKLEATGGSVTPDSHHYNYKKGEIVHARRMSS
PVX_083490	Pv	OG4_34082	-	+	hypothetical protein, conserved	ribosome biogenesis gtpase	MFLKSAVFLLVHIFITCTKCHSYFLKNNYFENVFFVNSHIKGFSKNDEKEAVKMERNRKRGVFYFPPKSGALGRRGVYRWVRKKRGHSSTRCFFKSNGGVAPFSRNGDSGCGRVSGDARLNSLARSNWSRWSKLFSSDFEKAFKENFDESSRLKKSELVSILACICTNIVIEFLKIKEEKKTEDFDYPFDYSLMNILKLVNFEYDVNEELQKKRKKQKREFNRRKFKGGGNEPNEPHLGGPPIGGAYEETEEDVNINIDNKNTKEENDKLDEYIKMMEFNTMEIKHIEPYIDLFFGKKTFQKVFLKNGIDIHKIYDKLSEALFDKCQEKANVMELQRFVEHEERNIHKKKRVHVRNGSMSFDEYMEGLGSLEESKGVSEVERILYDGEVPPKVAAKKRK…
PVX_084105	Pv	OG4_54789	-	+	serine/threonine-protein kinase Nek1, putative	serine threonine-protein kinase	MLFFFSFFFVFFFFCFLFYFFVLFFVLFFVLFFLHLRFFFLFFFFIFLCFFFFFLLFFLLVVFLTFSITIRRMLSLLLPSISNTDEKQSAYMNYGYKFETVLDTLTSNSEIHLIRSLETGEAFISKVYDIYGASESDLNRYMNELHIMQKLENCENIVQVVDFIKQNDSLSLITEFCSQGDLYADILKRKMNNEMYTESEIFNIFNQILNGLNSIHSNGITHGDLKSTNIFIKDDTIKIGDFGISQKGSNDNLGTLNFLSYESILLKKTNKLSDLFQVGCILYELATLSSPFSANTMSDMISFFEDKNYKNYIVKDISNIYSDKLVNIISKLLSLNTLERLEAITNYNLSRTESLNLEVSNNAQYVIA
PVX_084315	Pv	OG4_43617	-	+	glyoxalase II, putative	hydroxyacyl glutathione hydrolase	MKLARALVAINCFSPAGATPRLSMSSRLFFERGLFSSGNIHSTRFTKKDKKYFIVKKPDICTNVIIVPMYRDNYAYIFYDDKDEGVAVDPSDHNVVNEIAEMEKIKIKNVLCTHKHADHNGGNSYFFNKKINVYGIKEKDNKYINSNLQNVKTFQINNFKISTFLSHFHCNNHISYLVENAQKDSSKKKIFFTGDFLFICGLGKNFEGNNFDLHNSVRNLKSLQKDAANIYVFCGHEYTQDNVKFALSVDGVNPHLAAFHQQLLANEDLLPTVPSLLQDEFAYNPFLRCDEEYIQNEIKKYAKRNHYVISAKPEYISLLRVMKDNFKCC
PVX_084415	Pv	OG4_34333	-	+	RNA binding protein, putative	conserved plasmodium protein	MTILKILLLLLPLAHSFVLKKKPQWEAQQAHRTKFQLYRTRYFRKFKTMPYIRDSGENHIKELTRERVRLNKRTTNSITLGANFLFICNLDNRLSSKDVTHFFNYFIGNNNCVARIRRNKYTGRNMGHGILKFQKAEDATLVLLTYQGIKLGEKNIILTEAFKNEHLKQKKHICDVLQPNMS
PVX_084510	Pv	OG4_10837	-	+	porphobilinogen deaminase, putative	porphobilinogen deaminase	MHWLASLLLCAHVSTYICRHVHLKASGFIPVHNWGLWKRKKINVKKNFCTGKSCKKKTTRVYVGKEIIIGTRDSPLAIKQSEKVQTKLEAYFKKINKNVKVILKPIKTMGDHILDKKVGLFGGKGIFTKELDEQLIKKNVHICVHSLKDVPMELPEHVQLSCFLKRDTINDAFLSVKYATLEDMNKRKMANKVEEESDQEKGTIQQMTNQGLKRDNCEGDKCTNFIPTIGTSSLRRSSQIKYTYKNVAVKNVRGNINTRIAKLCNGQYDAIIIAKCGLERLLTKKVVRNIIRGKGKVPPEKFLLNHNDMETNLRLLRIQQINRRTIYPALCQGIIAVTSHKNDVDTSNILKNINDEKAQIMANVERSFLYQIEGNCMMPIGGYAQIVGGEIVFNAVIND…
PVX_084845	Pv	OG4_41452	-	+	hypothetical protein, conserved	hypothetical protein [Plasmodium vivax SaI-1]	MISSPFVLILLSLLPPQWRCHFRNSGKDQGKYLSPPVGKVRKNGSRVFSLLRRRGSRDAHPWGEDQSMSLCPLRRRNVYSPSERLNDRVRNPPRVNATHCGRPFPLKCASICRSFDKRGGNSTTKWGRYTTEKAQTMFISCKTGFNYSKRKRYGGTVTAAGNISTQFVDHGKGKLPSGGGEQERLQDSLEQTTNDVNLPGGTPPVGEPHSGSEMPRDRHTSEECIKNIIGNILKRSSIDSYTQNEDLFRMLKGINSLLSKLNVQGYGKEDEGGGVVDAHSLSTDELAAKSGEQQLIGMNNLKRGTLCKHNYLNESGNFHTTDKHHGSDEHSSASSSPTDVLTRRAFKTWVFPLNLMLIKSWVDEIVKYVCADDHAEREISKGSNIFVKSENVFQKRLFF…
PVX_085185	Pv	OG4_48015	-	+	hypothetical protein, conserved	arabidopsis thaliana brahma ortholog	MVARFGGPPKVLLLVCLILQHIDAVLRMSNRRASYEKGRSKLSMGFKGRNEIIRGKKSNRISGRGYKYAKVGTPSMGLLSPQERRKKGRKGSYHSGGCLNELGEYFLRYVGSTVLTRDLFFLTPQLGKQHGQGTKWRFCVGEARGKKRKFRSRLAMKEEGKGDTPAENSAQREVHPNGSDDKRVGSETNQGITAESEKRQRLKELMRKELLTIEYIDEENERSEIQLKVHIKGSLREHYYDTCVKQYRENKLKENKYEYAYLKDVPINNLINYIKKEDYLGIFLKHVNEDIIRVYQKMNNLHLIGSPRLTNNSSHITISKFSDVHLTFSIDKFPKIKFNKSYVRLPMKVEIPPYERGSTFREFLKVIQNEKEKENEVTVSVDENHKVDWNDDVYVNVCR…
PVX_085520	Pv	OG4_37510	-	+	hypothetical protein, conserved	hypothetical protein [Plasmodium vivax SaI-1]	MIKIFLFFTFQVFALCVKNVNAVRERDSPLRPKGAILPIDLHLHPVAHPTCLHNSRLPAPRSQLCPLRKVSFSGLMGVSGLTIPLFLATYMIYSKIKNDNKNLTEAEKIMGKCLYKHDSSLIQGSNYEQEKTYNLFYIIHAIYSNIRTLINFYMNVKKVNTKDSANEYTILFFHSYNVDRFLHTRNIKTYVERLKEIYQDINKKKNVNIVYVPLDSKLLFNIKHFGNMNNWYSILFHDKKQILKMIKNYNIMNIPTMVLLDKNMNIINDNINYLLLHQRKDFPYREVNHLTYINWLYDKNNRKYDFKKLNSDYVLFYFNNEKDNKGDLQSLLKVKKKLAAKNVNVDIIFVKDMEMMKGKTSAKGDGMVGQQEAEKAGPLADEKTEGNVPSEGSGKEKAP…
PVX_086115	Pv	OG4_30613	-	+	glycerophosphoryl diester phosphodiesterase, putative	glycerophosphoryl diester phosphodiesterase	MGTRKGKFILLASFLYVVKNCAGQMTTIVGHRGCGTSEAGGTSPYPENSLYSFKKAVDENIDGVELDVWLTKDKQVVVIHGTDDGLLGHTLLYDEDSQQKCIEDLTAEEIQSYHFKEPWILNKGRRFYQQGSTASGVSTVEMENVATNHTEREGIISHNDNNVCSCSSGHHHQGGHSHGLRVKTLVKNEEEQVKFATLSRSEKLRKKMEYADYGQPYINMEENEELEKLFNEGSLQGSFSEEGEQSSQGEEQPSQGGEEPTYEPRQSRRERRNARMSEQLLEGEFINSIKCSFCKELYTGYVMKKNYTLKKKKKLFKFLSKFYHVPLLKDLLNLYKDKLTYDIELKGTKEDLGVHILDMLENYKQYKFKFSSFNWVLQDGQMEKGSEQEKTDLLKPLRN…
PVX_086165	Pv	OG4_34342	-	+	hypothetical protein, conserved	mismatch repair protein	MRSTTGRCLHLLIALYVFFFSKHTMCLRKRLLFNCLGRGKMVLLVNVKRRSATRVSNCYLNGLVYTREEDIYRINQVGRAAGKPSVGEAASRSVDGSADVATVGSTDVSNEASIISNSLLDSPADERSGAEGGNNCTMPRTQFEPSDYELQMYKNKWNIPIYWVKKLERLKNINAINCVEHLKDDNLLYFDNYKNKGLLKFLNEEKKKHSNCIILVRVGDFYETYGLDCIFLIEFLNIKKMSNKLSCGFIKTSINKALHILTSNNLNICVYEEMNEKSLKMKRRYLSQIVTPEFPIYLNNIQYCQGESNNMVESADKGSNLFFQSYDLEDHFVVKEIVCIYIESKNVFSLCKINLSLKTISIFDHISFDVLNVYLKNTHFLKAYIHQHQNSSFTSKITQ…
PVX_087715	Pv	OG4_24014	+	+	hypothetical protein, conserved	trna-splicing endonuclease + effector	MILRRLQKPPASCRYMYIFSLINLFKSASSVLTKPSYAYIQNCNHIISQLPKKTNKLILSSCSNKKNYNAFVCKSYKKYKMNKKFSSSINMNKSNENENVLKDNNNISAFNKNTSDVKNFENFNQSSRSSAFGKRYSHGSKSKSKVSSGSYVGGGVGGSGVAGDGEGGGGGGSKYTSGHTYSGNHPGHHPNQINRETGAKNEEASYSLNETKLNTNANYMNSSMKENKGGGYPMNSSDPNMPPVNESSKIIQHNTKMSSFNKDNMLRKGVKDEGMYGHSGLGPNNSANNVMGSVDNAKSGMNNNSGSATGGNAPGGNAAGGNYPENNQVKSTSYKNTKNSGSGSGNNRNNSMSEKKTNMEGIGSTNLKGNERFSHLNENRASSTKYNAKNAFSSNKKNM…
PVX_087975	Pv	OG4_10853	+	-	cloroquine resistance associated protein Cg3, putative	cg3 protein	MKGVLPLSVRRLRAERGRAPHTSRCALMRCVKRLDGLPRWKWSQTRMEQNGLRHLTTGREDPPKEMKKKSVFLTWRCLGFNLALSLPLLYFYLLQCEKKKKQKGKGQIGLTQVEYIGKPLIGGDFTLINHDGKVVTNEDFKKKFCLIYFGFTYCPDICPQELEKQTIVIERIVKKYGDVITPVFISVDPNRDTLAQVKHYCSSFSDRLVGLTGTKEQIRRVAKLFRVYYNEHVVGEEQTEEQTEKQKERQTDTQTEAQSGDPPRAPSYNYLIDHSIIHYLLDADGKFVDFFGKNCTTSEMVERISHYVDLHLQSGAAV
PVX_088155	Pv	OG4_16894	-	+	DegP-like serine protease 1 precursor, putative	-like serine protease 1 precursor	MKLSLQSYSCCAAVAALVVIRGGGDPWGGFFPRCAAHQMGERPPPTDERNYAENNGGKLGGEIEKEEEEHLHIDREVKGDDSHFTFDESSPTGGGKNVKVGLPLAKYTPGYVRPVLSDKRVTKGEAPGGENNLPSGDPQDGPPYLSKQQCGASFRDNAKADEHPSEGSHHDGEEPPSAAPNIWRRKKKNILQHRMSPTERGQEGYPPVEEKQTHREASNSDGSNLHESNFRGGSSYTEGSHQVGQLKLRTNRDDQKMMKGIFTPQVVRAMKEYLLKGGKKYGSGQVGHLGGSSDQQHGGDRRTGSNQAIHPLSGEAIHPLSSEAIHPLRFFPANFAPHSGDSQRGAARRSIINEKLRRNLSQITLSVSAAEERTKERVEEGAEVGAQSVAQSGGADDGE…
PVX_088200	Pv	OG4_30703	-	+	hypothetical protein, conserved	myeloid lymphoid or mixed-lineage leukemia 4- partial	MPNRGEERRAGRRGRSGRAIAAGAAVHLLLLLLLRTVGGDALRAGKRGAAGYGGVMRSGCMTGYGCVMRSGCMTGYGCVMRSGCMTGYGCVMRNGCMTGYGCVMRNGCVMRNDCVMRNGCVMRNDCVMRNGCVMRNDCVMRNGCVMRNGCVMRNGCAMGNLAASRTRGFLRPPVRPPKRGKCPPKMTPLNAFERSVDKVTGHFLNDRDLFIEVDKKQKIIEEIEKMNHLQYEQIHKYIQTLSENDVYEEIINHKIYLYKKGNEIEKLQKLVKMQAFLNPFIISQRKKKAKAKVEYMIACILKGEDIDQIVTDMFRKKLIDVYVLTFIDDKVMEAHAKLFRGGSGEVSGESDVRGDSGGSGNGEVRGDSGGSGNGEVRGDSGGSGNGEVRGGTDQMSMTE…
PVX_088945	Pv	OG4_11105	-	+	leucyl-tRNA synthetase, putative	leucyl-trna synthetase	MPFSWTLTLVSCYLLVCETARHVFAVRSVRGGVRSGHGGVRSTHDSCALSFLQPSGRDSGRGRREGKLGAYDFRAIERKWQVVWNSKRLLDRDFARFNRRAGGGSVAGGDGSSVGEGGVAGGDGSGEGEGGISSRLSGEPKLDRGGKPARRKFYVLDMFPYPSAQGLHMGHILCFTITDVLAKFKRMTNHCVFHPIGWDSFGLPCDRMSMRMKVDPRKIIQKNILNFKKQLLKMGFLFNWENEINTSDGGFYKWTQWIIIQMYLRGLGYKKMSYVNWSNEINCVMSNDEMKNEANLEGLKVTKRKLLQWYLKITKYANRLIEDLKDIDWPQKIKQMQINWIGKRRGIILKARVIPTGEWAAGDLLRIPSDCITPHVCYHSIYANDGVTLLLNYLYRQGG…
PVX_088975	Pv	OG4_27548	-	+	hypothetical protein, conserved	hypothetical protein [Plasmodium vivax SaI-1]	MKVAVTALTLFLFPTKGEAVAKYTFIASRPRFPLQSGREGTHTNVGRKKKKKKNQINQINISGNDLFEYFVTLSNEEDKMNEERKKKKKNYSVTYIQKLPKKNLLLKRWKYDLYEKIKEKMKRDQQLMSRTKVCRHKYKLPVDFFKLGDQVRGKIVQVEDHLIKLDINALNFAHLYIKRYSEEKAQLRKKFQVGKHIDVVICYIHRKNGIIQVTDNEEEIKALRRGLQKLRDAGVLRPRTGEAGEAGEAGEVASNMEDSLEDSPEEPPSNQTNLPPGNTANSANTANAVNTANPVTKELGVEFRTNEEGQDLMYVKEESASGKKKNITHFKIEDTVSGVVKYINEEGAYIDIGCKTLAFLNLGHYNKDPKSLVKEVKKKKISIGDYLRNLKVRKVDVLS…
PVX_089020	Pv	OG4_54936	-	-	hypothetical protein, conserved	hypothetical protein [Plasmodium vivax SaI-1]	MCYFRPSKEPFRSCQRGARPRRQRTASYGAGRSEHSSQGEHLDSYYDEARYLSKEQMKAYIHKMKKEIQEYKLREMNHKIEIKYLRRKIERLKGIIQNDHFFLSHQRGASQRSHQRGASLRSHQQGTSLRSHQRRASLRSQQSGSSFKSGMNEVHSDDGKHSGWYRRGNVSEGNYHRRGFSQKYDGVHHDRDRSGNLNRSRNRNQSRFYGDHLSEAKFSNVSMRSINASIHNNKRMNVRNFTGRYSDICRRSDYSQVVPSGKGPSANNATSGNVGRSNKLKNYVRDHPVHPFPMPMKVKNEKACEDRMGVAIRRGPDSFRSNRSCSCTSKFKLKSHLISNSNHMRNMSTDINTTIAKGIKSYYSSKQSILSGTSQQPFGRNLSSFKKRPSGRKGVEAKA…
PVX_089080	Pv	OG4_39922	+	-	hypothetical protein, conserved	origin recognition complex 1	MLDVKADTPHRKASNSCKKILSDMIACYQNTICYKRENATFEECLHNHDLNEVDENCIILRRAYAQCRRNILNGNFKMLGNPLSR
PVX_089095	Pv	OG4_12019	-	+	translation initiation factor IF-3, putative	translation initiation factor if-3	MLSNFFFFVLAHVFIFSLRNSEYVCCFYTPKVCCTKLFHLRESNDASSYSEGRERYMQEKKMKQLKLKAENKVVKQLRITPRIGANDLLIKINSAKQFLLRRHRVKFILTLKGREYTNVENVKKIFAKISEELKSYGNSESMRQNGNVVSQLFNLKAKRKNESSLGGGAAGGKEGGIK
PVX_089230	Pv	OG4_47482	-	+	hypothetical protein, conserved	thrombospondin type 1 domain-containing protein	MNNRQLLLGALLLPLLVAPLPLCATNVVRERWGGEGSAPPSGADVGWAGSTWKDVTWKDTPWRDASWKGTMMITTAAPPLAAPAKTNWKPPLKGNDARGRSLQNADDDKDDSHGGKNTSQYFKCFVDRARENPGAKEGDLARWVDPQHNSCYCSEEDAEPCSVDDISNSKFAKHLMRKEICDLNERGNKNNLFIVLGNYFTIKCSNLESTTERISQEDLYSYCKSGLPAWDNKHFYEYGNCDRVGSKRGVKKRDVGDPAPSCADLCRDIKALCNSKSSQFYSFEMCAKYYEINQFTADIFNNTFKKFRENCSYFDPTNRGLLLCKHKHIPCEFSNWTEWSACSKSCKDSSYDAEAIRSRKRHLVKEVKYAGKACSIVVNDNNKLTDVDFCDEVPLCTSI…
PVX_089360	Pv	OG4_48163	-	+	hypothetical protein, conserved	hypothetical protein [Plasmodium vivax SaI-1]	MNLFSFFFPLMVLLFLNPFRVTLAYKKGPPVGITQHTSSHFWRDPNSKCKVLSVRQPSQVSCFTKARLHNEPLHKEVQLFDETNEEENPPPVFLNKSGENNPIKDTLRKTKKFCNYLTSKLGRLNKKLREIKKLETIFYANPNILTESQQVKLSKKKQIKKELVLIHRYRKKYLAYKKNLTKNVDDMSPFFYAKRKTRQKRQVCTPQEFRKIRTHGGAGHKNDGQMQSDEPKAAVQRVKSIDYDQIPRNVTDYLVFNKVGTKEDVKILFGLKAVKINGNTLDDENYLINPREDKVEVFNEVVQIHESHYVVRKRFSKNQKKVLEEKSKEKLSDVRREVNEFENFFNIKQ
PVX_089395	Pv	OG4_48129	-	+	MAC/Perforin domain containing protein	mac perforin domain containing protein	MINLLATKRVGVWVCLLLTLCGDPKSGVRGGIGSSARMDTPSDGSDSGNRIGSGDRFDRGDEPFSKYVGKGYDILFGYPLPNNELVEDPGFRNEIFDTRNSLDIISQVACHRDEYFSFIEGINDVAHLAMDNINVEDVNTSIIPFSASMPYKSYFADLEIGRKKYLVAQNSCVHKYVTYNLRDSTRHINREFLLETEKLPILEKKANGKDFLQGEYPHREGNQQCAGSIKPWMDFFQKYGTHLVLSAHFGGRSFNALEVSRRTMEEAKIYSYKYALGSVPSLDVFRAAWLQQGGPKRGGTEGSAGSVDGVDSVDGIDSVDSVASGGDDILNQPNNQLHDQPLNQPPRTRENALGGRAPSLDTRGGNQTFDGWNQLTYAVWKDSIYANLLPVHLELISLS…
PVX_089650	Pv	OG4_34112	-	+	ribosomal protein l10, putative	50s ribosomal protein l10	MFLKEAGGRRLSLAPLLCLLLTVCLLNPCGGKHSRGIYTPGAAKVPLELTAPPPRGIAKWGGSAGGGGRRWRRGRRHVDWYPHFLSNANIGEKKKGRSIRINSRKCSGYRNTREGKNEMIRKIKRILKVTKLLIQLNSFKLTPNMRMDLLINLPRPHVRVHMVKNTLMKLAVENTPFEAIVPHLKESNTYMFIMNENYIAFTLYGNKAFSSMYKEYKMNNFIKVSVYENTILSKSETENLVNLRTHGFYFGQVVSKLVRLIGDIPRSIMQVPASIARGIYLHAQRGAREGQ
PVX_089765	Pv	OG4_118788	-	+	RAD protein (Pv-fam-e)	rad protein (pv-fam-e)	MLTAPRVVFSVFTLMNIVLMNGDLPNGSALSLGGAGQKGPRQLSQFTSDSDGHSTSSELNKKKSNNGKCAGSDCSDCSDGSDCGDCGDCGNCSECRECSEGSEGEQGESPDGAASCSVKKEQQKKTQRDDEDYDDDEEEEEDDEEEDDDESNEEESHEDDEEEEEDGGLDISGILKEHMFVVPKEKVELLLDECNRIQKSDYERALDNLFGELHDFSIQCGLLKEEKIALWNECLEDIAKDLKDIDDYYDEIYDFNMNAETVVTVSFVYSLTNFLNLWTTTIEGIEKKWCALFAERALDYKDALREAKLRKAATAEPDSQEGAAGSSASGAASTTSGAAGTTSGAAGTTSGAASATSGAASATSGAAGTTSGAASATSGAASATSGAASATSSAAAAAP…
PVX_089895	Pv	OG4_10803	-	+	glutamyl-tRNA(Gln) amidotransferase subunit A, putative	glutamyl-trna amidotransferase subunit a	MGKRQRSRRPSQVNTKLLCTFLLLLRGVITTNVPTVCAIKRHGGALPVGGNKAFREGTHLRKCRRLRRATPSWYILPPSKCTPMGSKKKFKKGTHLAPLLDSSSETSTSEVYQIRREIFSHKNITNVLERVILKRVTQGDLNQYNSFCYLYSRDEIYEQLTNLQRIYEECKDLEALPKLFGVPIILKDNICTKNIPTTCGSKILEKYKPSYDSTVVRRLKKHGAVIVGKTHLDEFAMGSCTGQGVKNPFNESDLSCGGSSGGSASCIGSRIIHCSVNTDTGGSARTPAALCACIGMKPTYGRISRYGIIPYNEETDVVGLIVNNVYDCSILLDVLSGGDKNDLTTLKGKEKKFHRKLKRYEASPNFQENKWPLKNMKFGYLSEELLKNYFIDDPTFQSY…
PVX_089930	Pv	OG4_10790	+	-	small GTP-binding protein sar1, putative	small gtp-binding protein	MFIINWFRDILAHLGLSQKSARILFLGLDNAGKTTLLHMLKDDRVAQHVPTLHPHSEELVVGKIRFKTFDLGGHETARRIWRDYFAAVDAVVFMIDTTDRSRFDEAREELKHLLETEELSNVPFVVLGNKIDKPDAASEDELRQHLNLFSNLTVHNMKGNSGVRPVELFMCSVIRRMGYAAAFKWISQFL
PVX_090075	Pv	OG4_54213	-	+	hypothetical protein, conserved	apical merozoite protein	MNVFFCLSCFLVIKTLFQSCPAKCNELNVSGKGNMLYDYLFTPEVKAPKDDGGKEQDTLAGNKQMSYKTSEVQIKHHEEVHTGGMENGDHRKELKEHMDQLKMLHKSLKSKDRNTYGQVKPSGGESVHSNDGALGDTHTGGDQTSEESLAKYVQNEIKNNEKLNKEKKSYDEINLLEDNSKKLQNDIHTWLQSVKNITEKTSKLKDIKTQLLNNIASLNETLTEEIENINEIKKLQKEQNEIFSENWLYFLPSTSDSLASEGRDGSFQVLNYLEKFSRRDAPQVSSEPASGELQNGGLPNGGLPNGGLPNGGFPNGGLPNGGPPNDGNVRKAHSHTDDGAKSSDSRSFCSVLVLLAIAFLLS
PVX_090180	Pv	OG4_38540	-	+	hypothetical protein, conserved	hypothetical protein [Plasmodium vivax SaI-1]	MAMPKGAFLTLVLLLLWASPWDGGFPPLERSSPHGCPQVHPSEGGSCTWGMWPHRFIPPSRIKGRTKASRLYAEGKVIYGLKEDKDFSVYAHFCYSRGRWEKGKKGVFIVTNFYIPNAKLLILEQTEQEMHSYVDGKNGNTCADLEKKALFLHPFDDIPPGDLKDSYFVYEGDVGDHLKGTQLSFVLLACGRQVKNAYKIEFRNNTHFLRNHFSCEEQGLIEIHLLLVVILGVLSLAYRAKQESLSRAHGALKEALHMAVIFFALSNICYLIHIFSFAFNGIGFTSLKVFSQINESIYDCLMLTIIFYIMGCTIDKERRREDTFRTSLTYGVLKFLYLLVEMQNQQELNLYASLHSVVALPFVAYRVVTAAMIYRNCKRLLMEKTPGEETFFILLQMFL…
PVX_090205	Pv	OG4_48425	-	+	hypothetical protein, conserved	hypothetical protein [Plasmodium vivax SaI-1]	MVSVRRGCNCVCRLMRRRHFAVFLLTLVGSLGQTSQFSLINVAQQLTSISGINLTSHSSTLNLGSHFSLRTLLNLFNLFVLLNLLSVINRIASSYRGGETNSRHYKIEKHFHEHGRLPLTGGSLTGGEEKEGSCPTLICSSDGATQSYAVPQLTTLGRSPSQKGSTAQLTYLADSEDFQGGKFQTGDTQHGYYLPRHFTLLSGGETSKLEEGSIRHGNARSLLSLTRRKKNKNQDNPKESKRKKQKKKKKKKKKKKKNRKRNRRRNRRRSKRRNRKRNKRKNKKRGRRRNNKRGRRRELKREAKRQRKQERKRNENMKKMKRQQKKMNRRMDVQDMGDEEIISERRPKKKKARKDGDDTPRVTYISEDEHDEHDEHDEHDEHDWHDDHGEHDEHSHGGH…
PVX_090855	Pv	OG4_54820	-	+	hypothetical protein, conserved	cpw-wpc family protein	MKSVGVVLFVLLIKEIISLKICSRRKYPNVENGVYQLDNRGRPIKIVDVNYHHVWELPKGGSVNSYTVVKKNGKVKKFSEGTNIIYGTTKKVNRGGGSEEEEEEDENKVKKEIAKRKKTNNIKNVSNVAKKEKDVEQKKKEKKKLEVPRAMHITAEDVPEEEEANEEEGIAKELGAKIKENLESHYEESKAPSSLSADLLDVKIPASLEKLLMDDLEEGRWLSKKPVHDKICLRDYSTQCPSLWEKVSETQCISPKDYAGPCSHLMTFEPMSAKEKSLIGTDCKVNWLCLNELCGNSGRDYSKDCPENWTYTGKCEAPENYSGGCNKTMDFGAFTQKEKEEFSSACKAVWPCKEESCGEDYSITCPKGWSYNASKDTCCSSHGFEGLISKEEMDAISNM…
PVX_090990	Pv	OG4_34338	-	+	hypothetical protein, conserved	5 -3 exoribonuclease	MRVPFWQACSLACFMWPAAGGAKRKEQLFIGSPSHTVRSGRCPQYDCVAKRKGHRIFGIPRMYKWLTSYYPTVREELITNEGQKDVDIFYVDMNGVIHHCTHANKETLPVHDEHELLTNILKYLKNLFHLVKPRKLVYVGVDGVSPKAKMNQQRKRRFLSLFKVSDNSNSAHLFNPNCITTGTDFMYKINLALNKWFQILKKKGIFPFDVIFSGSDVPGEGEHKILKFIREHCKRDGAFRNYSHCIYGLDADLIMLSLVTHLNSIFILRDKYKMANDSHAALLENLEKAQRGVGQPGGDAENTNHGGNEENPIQGGNAEEPIQSDTAEDTIQPHTAEDAAPPFCRVHRYTQDHYANCEPLNSYDFEILDVYKLRNSIRTQIATYINKLKKEKNVVFNIS…
PVX_091035	Pv	OG4_27482	-	-	hypothetical protein, conserved	conserved plasmodium protein	MEKTKIEALFIYDEDVKKADKSVTDEELQAEKVIYYYPAETDEQVKVTHTSTMEGVSAFLSQFSRSHMEHIITKENLIVINKWYKHVFVTIVVKNVYKNEKMELLMCKLLHSVLENFISTFTLLHGHIRTFLKYKKNKTAGNMDRKTSLQTLLDDFVFTYVNAINSECVSIHNGLQSFHFFPVEKHTYVTVQNLISSLILGQKQIKHGCLLYEGHLIYSSLEMSDTKMVYNYLVSYGGTVNNLKLNQPPFRKIASSAAINANGGLSSFARCNTIDEKNAFLLGIKKSSIFMPVVSLGAEKKHKLVAFIYKGILLVLLIKGSTIKDEDYDILIDVQNKCANENSSSIYSLCKLNEILSVQFKKYLNQDDPVRYFYYNHFSNSIKYSINNKKITNEELFLV…
PVX_091435	Pv	OG4_21586	-	+	hypothetical protein, conserved	moving junction protein	MSRKRVFLLCIFLAISAVVDEAESFRKPDAAANVSFLEFTADGNAEEGQAQPSEPIVNTQPLQENVSEAAPHSEESTGGSAEKGSGGHEETPHAGEHDKGSGGSNGSSESNGSVLADGHAEEAPNEQVSSEKNDGHSESSTTGSHSDKEELDLYTSSPSDKEENSAPAMGGMHNTVGLRGGSASESAAPSEEKASEENVPHEVADKNGEDTSQEGSHAGALSPAHVGGESGESGGEHGEHGEHAEHGEHGEHGEHGEHAEHGEHGEHGEHAEHGEHGEHGEHGEHGEHAEQEEHQIYGTIHPEAEASILPALKEKGIHVSSPERVILEIIESAKEGIKGLLKLRKSKDTGKLLEEALEKLNINQRDLHANNNFITLEMYDRILSEMFKILTEMSFYKDG…
PVX_091655	Pv	OG4_10408	-	+	tRNA nucleotidyltransferase, putative	potential trna cca-pyrophosphorylase	MSWLGAPAYAPPLAKPLPQPRSPRSPKSPKSPKSPLLPLLPLLLSLPLFLLLVATAAAKGASRNAAAALLPSKQKQHHAKLFFGWKNNHMHLLGEKKIINCTRGLLFINANRRSHPLGGRSHSKRFTLHSYSTRGKMQEEAYLSYLHKYVVDDRELARSGGVSKGQQGHPPPDGALQIEELITKTMRKEEEELFAFLQKVNETYKLQCTLRVVGGWVRDKFLGISNDDIDLTVDNMKGSEFCNYIKEYIQEKEKKNFNFGIIKINSDQSKHLETSSFNLFNFQVDVVNLRNEKYTEDSRIPEIIIGTPEEDALRRDFTVNALFYNLNNRRVEDYTRRGILHLKNKIICTPLDPLSTFLDDPLRIIRCIRFCGVFNFFLEKSIFDVLKNEQILKAFKKKI…
PVX_091840	Pv	OG4_10672	-	+	pyruvate dehydrogenase E1 component, alpha subunit, putative	e1 component	MKGEVCLFLLALILRGGRSRAVHMQRKPNALFLNYASAKGGAGDWRVAIGENKNVAKQSDVQTGEARPRMVKTHVVGSKRLDDPMVKIFQLDERAPMAEPNRREQNGADAEGAKERPPMSASQTNYNIYLPDNQLEDYLSDVQISKNEMTMLYEDMHLGRMFENLVAKLYYSKRINGFVHLYNGQEAISSGIIKNLRPSDFVTSTYRDHVHAISKNVPPRKILNELYGNYYGSTNRGKGGSMHIYSKSENFVGGFGFIGEQIPIAVGLAYSILYKREFPQGGAEVRSGAEALSGTEALGGTSSPSGAAPPLEDADVVACFLGDGTANIGQFFESLNLAATYNLPILFVIENNNWAIGMEGSRSSTDDLQNNYSKGKAFNIETYKVDGNDAISIYKLAKK…
PVX_092020	Pv	OG4_64938	+	-	hypothetical protein	hypothetical protein [Plasmodium vivax SaI-1]	MRNVHILHQRKFFFKKFCSIILKAYFFHHQIFKNDLIALLPFLIYENNYKDVFCFLLYAPVLVHREGVVSHRGRKKKVAPIGGVPTDAKNTRRVQDIRKSMHRYFRAYFAAVLSNSGGSDSGGGSAAGCPPWGHELAKIILRKLACPDILGILNKESIKELLKGVSHSVRCNASLLILLREEFLEILKNESSLYYHLVSEKVLQMVAQNMKRMDITCENIESYYVTLHSFFCGGDYTQVKFWVSLIHAFTSIAIYCQDFAESVLRVYAAFLSRSDVTLMLKHIVSEHVGMIKNVSYVKGGFFP
PVX_092420	Pv	OG4_41271	-	+	hypothetical protein, conserved	conserved plasmodium protein	MKRKKVLSFSVGFFLLCCTLIGLGISLADSSGEAPSQESFLSTCMHVIDAITFYEDELQNYKYDDECAAYRHIGNTVLEKHNLSNYNCYAKMQKALCKLSYARVETPEGETAEEHADGKGERELREGATEENGTYVEHQREDFPTEGGADTCTRTKDLFISLLRKCTERGYGDTTAHCASLDIEKNVISDGELFCESSFERKKSVQENGGNKSVYVNGYKKGITETLHFEEHQRDDCIGMVNLFNNCSTVRRSVFAGLPLTHCAEQSEKYLCSRRLHKMEDKNYIYTCSDVVVPYLLGASNRGKTYSQMCHDVNGYANLLKNEKNEFLKKKKKIQENVKHIKLTQKLYKITEHIFQALQEEVEKCNPDLLHLFNLLKNVKIVLPKKYMLKLNEITDGMT…
PVX_092530	Pv	OG4_14813	+	-	hypothetical protein, conserved	conserved plasmodium membrane protein	MSARHLLSKVGSSHILKSLISSLSGTLASVFFKKASDVSIFSTNLEGVTISWSVEIGVRVIYLFLFFVCNMVMLKYYLLLMNHYSAFLSTILNFVFNFFLSAIMGVLFFSEKRDSYWLLGGLLIIVGLVLIMADAANEEKKKK
PVX_092685	Pv	OG4_10812	-	+	dolichyl-phosphate b-D-mannosyltransferase, putative	dolichol-phosphate mannosyltransferase	MLKYVCRLMWLLVLPLLCTHTSMTLAQKYSIILPTYNEKDNLPYVIYMIINELKKKNIDFEIIVVDDNSEDRTADVYKKLQSIFKEEKLLLIERKGKLGLGSAYMDALKIVSGNFVIIMDADLSHHPKYINDFITKQKETNCDIVTGTRYNKQGGISGWSFKRVIVSRVANFLSQFLLFTNLTDLTGSFRLYKTDVLREVIQLVQGRGYVFQMEVIVRANKMGKKIEEVGYVFVDRMFGQSKLSPNEIFQYLFGLLRLFWTV
PVX_092755	Pv	OG4_11597	-	+	hypothetical protein, conserved	abhydrolase domain-containing protein 11	MLSPLTRSICALLYAVSLCRCFFPIGAGEPRGTHRRGGHPSEAEKQMRSVLRKGSITHLCNKIRCVNRVPWNEGKRRISSATLSSGKRSPSSSRLFSSFETRTFGSQAEQVIDGIAFTIYDNTSIYKEETSSTPIVLIHGCYGSKNNFRVFSKSLKSNKIVTIDLRNHGNSKHTDSMKYEEMESDIKKVLNELHIRNCCIVGFSLGGKVSMYCALKNESLFSHLVVMDILPFDYNERKCHVKLPYNISYMTKILFNIKTNLRPRSKAQFLAHLRAQTPGISSSFEQFICTSLREEAVKAVKAGEAAGNAVGADFTGGADAIGCSAGGPSELQNLVWKINVDTIYRELPHILGFPLNHQERKYHNPCSFIIGQKSDLVYTIPQYQSIIKNYFPSSQNFIL…
PVX_092880	Pv	OG4_35952	-	+	ABC transporter, putative	transport protein	MRKCPTVLLLLVVLLPTESKIMSAKSSSLVKKDTVRGYSAKVRKKKRFKVVTSRGRAEVDRLGGTPLCGSARNGDGLTSALRSGGLIGAHPNGYNKLTFILYTYNSWKEKRRKGVATMGSPQRGVLGGEKYAAKMGTGFKGIHLCTQREKQTGSAICEGEPTAGGAANSELFPFNKIKREMNKYAQQVKKFLEEGNMMNFLWVCKNVLCKKNIILLTFFVMIQSAIISIVIPRCDSLIFQQVSNRRFDRFGGLLLNCILVRVINMCLCGLRNYIFMVTSSDSLKEVKRLLFQIYIYKDSEYYDQVDHSEIVNKVTLEAHDFADIIPYYIIPFVRNFFSIIFNFAYVFYLNYNLSRVIVSCFCVSSLLTIISTKLKKRRIKCINREKARSTKISLEALNN…
PVX_092940	Pv	OG4_11652	-	-	hypothetical protein	protein yipf6-like	MVATVSHFTNYEFTMDEPVKDTVIRDAKSIYKKILHICFHQYDDDNTVKKWDLWGSFIVYITLSIIIFLDKEISDKKNTFAYFFFSFIIGHILVSLNLSLLHTNIHFFQLLCIISYAQFPLVFSSVVNLLVPCRMLRFLFSLWSIVWATYNCILILAKFIKKNRLLICFFPICLLQFFVATFLLIK
PVX_093540	Pv	OG4_37649	-	+	methionine aminopeptidase, putative	methionine aminopeptidase	MKGPTLVLLAWALLCLCRGGGGVAIVRSGSSVSSGRSGGSARSVSRVSRIQSVNRVHRANRVRPRRGFVPGGGDSQGSCAKQRRPRRPKLRRNHLHSTSAGEGFSNTVHHDVKKNTKNYSEDGPPASFHRYSENMKTRKNVHPSIRITQFDRTFMKCKEGYNRRYSHLKDSELFGSFRFVGRQKKGITSPRYYLPKYVERPNYHRTGTPVYVPYGSGGQRSGGQMSGSQGSADQRSDFNERGKSPHPYGNVKREEEIETIRSNCQFARELMDDVSYIICEGVTTNDLDIYILNKCINNGYYPSPLNYHLFPKSSCISINEILCHGIPDNNILYENDIVKVDISVFKDGFHADMCESFLVPKLTKNEKKKKKKFYDFIYLNDKLRTRHTKFILKYHFDLT…
PVX_094305	Pv	OG4_49679	-	+	tryptophan-rich antigen	tryptophan-rich antigen 74	MALALPACTSLRLSVCTMIDLCPRLEENWLHIRRNDDFIKKRNAPYSLLFSKNLKMYGESNSNSSLYYMCIAMSIVLHYGLTCVINTNSFRKRGHRRYYDSSYTDFEEIKKSDTSENSSNDKDYNQTNNIVDQIINPNFANIKIGSNSNITDHIVSHARGEYYPNITNEKFTKIDDETFSNLLDGSLSKFENENFTHATEHKFEKLPTLKFVKQTTSKFSKLITPCQRNTATDTCPDVSNEQLFNLMSQKAPNDESERAPNGESKKAPNDESKKAPNGESKKAPNGESKKAPNNETKKAPSDESKKSPNGETKKTPSDESKKSPNGESKKTPTTITKKRTSDESKKPAHVTSKKPPNVESKKPPTVKSKKNPNAKSKQSPSAATKKSPNTGKKTPPNAA…
PVX_094310	Pv	OG4_47529	+	+	hypothetical protein, conserved	conserved plasmodium protein	MSATLLFLLIIRLALSLPPHNAKAANPSIKDADFEITYEPNGRQLHVGSLNQERCNNYSYYINQQCEIIHSLEKIDEQNALLCKNKNKCEYLINYVFQSLGIEAVPEEDFLNLTLPLNENVGEKEKCNKEVQINEKMKCMCCIKEMESSETEKINTELTPGQRTQNAAYPFGDCKCVLKYEVDDEHALNADKCKNFICNSGICTRRMDGEPLCSCEENHYFDKRVSACVRHQDGVNGGASQASQSRQANQSTESNQSTESTRSTESTRSTEAVMDQPRHVTYESDSNGNKINDDHKKGDHTQRVNDNHDDDSETHSHHAQGSQNNHENRNLSNAFTDECPINHVRNKQGECQRRESNSAENICLRIECFVNSDPPECTCVDKNGEKIEKAIFDVSHITM…
PVX_094425	Pv	OG4_41739	+	-	hypothetical protein, conserved	conserved plasmodium membrane protein	MLKYFTKEHYSYLSSSKRMSFRVEKDIKTRTTFVNREDLKHMFVMDSQDTTAGLCLLNISLFLLGGLSQEKRKGDLATNLQGGLFIISLIIFSIQKMLARCILSDVTFALLLYISCVLPFLLLELNGCFNNLVFFPICVMFYFTRYHLRTLFILDSFLILTILVINVSINSSTIDIYIFLFLLTALFLSMIYYRYLYYFSRALSNSVASPRNMILMFPYINEYHQVCFAKLADVLLDLNNYMHTKWNIFCGNIPKGHLKSEKDFRNLQIVASRLANKFFTLRNQKVFSTYPPYYCLKVLYHKKLYLITSAIERKRKQIGKMHSNQNRSNFLFLMEMVRLHRGVEPLQEDARHSGGDPLQLGKGPSQRGKKKKIKNATREDAKRGKEGNNRVEQNARVDP…
PVX_094445	Pv	OG4_47490	-	+	tRNA ligase, putative	methionyl-trna synthetase	MKWALPPLLVGLISVPLAEAFKGSPPSFSTPRGDFRPIGRHPTWASPFRRKEGGNNWRRANPKRKYQHYYAYVNRGKEHMPWGHSTTRARVTKRTLGALQKGNPENSVRGSTPGGSSPIGEKQLVYNSPTEEKQLANNSSTENRSTNVPRFDGQTGEEQTEGDYFVSTPVYYANDKPHIGHAYCNVLSDIICRFAKWECAEGRRRRRVILFSGMDEHGLKIERKSKKLEISIAEHVNNMSSYYQMMNQKLHVHVNIFYRTTSQFHKSFVQQVWKYLAENGYIYKGTYRGYYDVNEEKYLNEFELKQKRKNDPSVLYIEEENSYFFNILKFKNFLTDLYQRSEEVIYPSYLQKEMLHFVNHELKDVCISRYNTQWGIKIPGEEKGTIYVWFDALLSYVSS…
PVX_094490	Pv	OG4_30632	-	+	hypothetical protein, conserved	conserved plasmodium protein	MWIRTLAGLLLLVIYAHLRGSLSVRVTPHGGAKMSPTMGWKPPPQYITTLVNKTPIGKITKKSVRPPLRRTNVKMILAPKGSMHEKKTKEILEDPLKNYPWEISIPFHETITKELSPYYNFLKCEWAYVDHKKDVRRPCGKIEGGLENYDGKGLKLEKGVDRPRYNKIPYYDDHGVEWRNINQDELIRFDFLPDGNQDQTFLETEEDLEHRQWGNWNYNSSKETTQLNSAWRDPVLSRSLTNLIYPWNHKAHENHAIPYGYSSPALFIPEPKIEWELAARGFFAGYYEDPNWSRIKYYKQTRKLILQWHDESKNNGGEKDSRVMDRIKMELFGMTTKKRYPSKQIKLINEHALLRAKEIVLDHLLNPSGDPDYITYFLDRHEPIDYIGGGNHHCSEEEI…
PVX_094670	Pv	OG4_54858	+	+	hypothetical protein, conserved	conserved plasmodium membrane protein	MINLLYALCALWNVFYLCAPLFTCLHIEDTVKVELPKIGSGDFLKICCADFCSFQKYDVTTKTYLFIKENIILHNCKNGINLYHSSDYFFHLAHFVKNDRMVEIVDSFEHQKVKFTVWEPLFELLSIGGGQKYVHMPLGFYEAKKCRRSHTKGNAIGGNTPWDNYGSADFELNRGGNEPFCEGALEGKRVGDAKAAKAAKLAKTNANWNKAPPGNKFVCTEHLPKGGNTKRYHYGDENNSCQVDPLMQLFNELMAEREKEKNSFFHHSNGFTQGSEAHADNVLISYIAKKFGQRHTSKLCAPGGGISEATLYLSHRLTPLIKNLLLSNPILIFLFEDPAICGLCAKRTTIVGEPTRGGKKKNKKWSPPNYKSMLKSASILLLLAILMATIWILLKRKKC…
PVX_094815	Pv	OG4_34337	+	+	hypothetical protein, conserved	conserved plasmodium protein	MIKIILTCLAAITIFCNVHDAKICYNVHRRNANSNVLFIEKNAPHKIRYRLKAKEFVNFREIQLQRIKDYRKRSGPDKNNINYNVKDAYNYHDNFLFVRNEVFPTLAKIENEKLKEREKFRELFRNINDYNTSFSRRTFMEFLIDLYNIFLKIDELFLIYKEDFSLLTYTGPMQLTNHLYDDIVYLTSVVENCDDVTVSPYGREYISHLEELSQKNKIKFLAHAYLFYKNFHLNKEHLLNSICKYLNIIKKLKSSKYVPDVSNFEFCLNKMSRKWSRWDKDNFLSGLHDATDKMMILTKHFQQTKG
PVX_094870	Pv	OG4_47305	-	-	hypothetical protein, conserved	ring finger	MSVLSLFHIGSPFLRTNCVEEKKIYENFICSVCLDICHTPVVTVCNHICCYKCLYYSLLHKRKCPICKQAIRNNELKRIAGKRKREYEQLRIRCNLCKEELKIKNYEKHLKICKYKRCKNYMLGCDYYDKRNKLKAHEETCEHRLIRCSNCYNLFYYKNRIFMLTLKEKYEMNVRCTYTYYSFYYNLLMNTNFNFFKYNKCMANKYFSCDNYLSKKLSLLRSFQRTLERFVGKSDPGQGGPTVDQSNGEITQSSGGAPIQSGNLLNNAIKSGPSVFYRGRATGASELEIEGSEANYQRLLNFAPPSGGVADDGPLHMLRTSRLANAHTGGSQQGESYESDSSGATDKLEEVSRAGEASQSSSTDHSRGSHQSSGSHRSSRSHRSHCSHRAKRSGPPRGG…
PVX_094905	Pv	OG4_25065	+	+	hypothetical protein, conserved	conserved plasmodium protein	MIIFYLAILCYVSSAADSQTKSNQNYLLKNHEPSKISRKKARKYDKHGLTNFTDFSFVSQAEASDSEAHAGKEGKKEEKDKKNDTGKDDWKGKHEEHAMHEGEVKHAVQETHGEKKPSNEEKNKKESKDDAEDDDNVDEGDEGDNDGEDDDEDGEPKINSKKKGNLKEDKKGGDNKEKKKKTKGDFDDDENSEEDEDDENEDEADGEDEDEEEEMGKKPSNKKDIEKQQKGSDKNDEKGKKEIKVHGGDEHKHEEHHEVHTAGKHQGDNHVQAHAQKTHNAAEKQQSGKEANNNQAAHNPEVKTSVPILSNIEQRQPTSPPLSNVAQNAIPALSAFIPKREDPIVPHNNNVKINEDIHIPDDIKKDFMKLLRSVVQLNVKEALHQGNSHHPHGDQQKNS…
PVX_094925	Pv	OG4_23369	-	+	hypothetical protein, conserved	conserved plasmodium protein	MKPTRALQSLVLLLCCAIFGRDKREDGGRSVSFIQVAHSFAKKKVCTSSSDDSTCRMVAFGQLDVSNNSVLRLKVLRPDGKGYFLTIRRDYVTILYYLKYMKDIPFKYTEVVDVFNHQKFKKYSEREIKEYTYTCNVRRIEEINSPDGDFPPHFLEYIKGEACSCQSYNLFRDNKDIKRSKLKCIYFNMLFSESATVYSRHCAIMDFSSYAVYDIDYPPLFNTQVDITVQEYSYDDVSSVLNKTYDLVTKEKKYELNDSITEIRDDYFDLWLLLRSEFHGKNTLVNLSNDYILIPSAPVHDIDVLASDVTRNCGLQENSPLLKGCDYHGVCNEIHPCLRKALMMPKYLFDLSGKTCDKFGVSLTKWRAANGNFCAAPPGHCISVNLQRYYDAHKAAMDS…
PVX_095275	Pv	OG4_13269	-	+	endonuclease/exonuclease/phosphatase domain containing protein	endonuclease exonuclease phosphatase family protein	MRRHNLLMCLAALTISLLLPCRKGVATCLSCNVAIVKYVPNARLTRIQQRERSGYPVKGKITACAGKRKSPFLFLWSKRFHGLPNGPKFFFRRLQTKGGKGSVLSGGSVQVLRKSSWREVGSTVGGTSIGSAPIGSASIHSTLTGNTSFDSTPIEHSPLLKMCAPEDSAPACDSAATNESKQKEETEAHSDISTSINKSPDMSIHAKKNGDVREEKSHGGQSGKPFTVEELEEIRKNCSYLKINETESDEYSIELYFHFKEFKLLRKKDETVKSLINRLILNMKKSDRKRKKRPSKKYSQSVEQPTGNDSTIDKEEGPPNDIRFLDKENNPVDENSLLINVADKLSYILINQHRVEVFNGLYDLKQIYVSMDVYSGHPIIPVNAPMKDLHSYVHYWTYA…
PVX_095415	Pv	OG4_45895	-	+	hypothetical protein, conserved	nuclear movement protein	MNRLCLLVAICLALSHSSKSVTDHHTAGIRLTLQRRCNVCVKTRRGKSHQGGASPPWNSPNCKQIRFVKRPAKRCRYLFCKPSHPHGRKKAVPEGGKQPGDAHQGGNKAAYFSTEQSGGRRYYKGGYHAGKTWSIFALHEGGAGGRGGMRRQRIGGSERDDCVASKLGADNLSEEDEPVRGESQVEEANRRGVAPQQSEPHREGGTPHQGEENLSEAMQRAERYIKGKEDDVLERREQQKKKKVAEKLKGQEDAFTDKFLNLGMYDVLKHVYEGGLYADSRSLVEAVCRWMRRAYTGGAERSAEREAEKSSPGVDNSPPVGSSPPVGTSPRVDYLVEKDLADSYSPDGGEKVAHHFHLDPPGEKKGSAQMEPLKLYNKKNLKKYFFSLNGGNILKQLVS…
PVX_096015	Pv	OG4_48450	-	+	hypothetical protein	plasmodium exported protein	MKANVLSVLFSVIAVALVFWQSRAPHDMRNPAEPSNHGNNVYAAKSVGRLERILRSDNMNIFQEYAGLQGQVPTNVMEGMTNVSGLSTPLNIQIIQEQQEQYEEQLDELIDKITDTWNDTFINMVEDYIDFTERNNIIDGEWKCQMWNQRWYRYLQYLVGSLNEVIENDNYPLETKEYISDEFLHWANHDFIWFLSIVKAEWDRRVELRGPPQVRA
PVX_096330	Pv	OG4_27876	-	-	hypothetical protein, conserved	hypothetical protein [Plasmodium vivax SaI-1]	MPRRRAGACPRDAREERPPHGGAAKHPLLLLLHTLFYCRSALLLGGALALLLGRMHHCACFAPPEGAGKGAGEGAGEGAAARAWRLFVSKPAQKKANQLKTKIVVNKKKKEENVKRKIGKSVEFKSSAKYKLIEDLLEGYPYTSLPVPAQSIQREPFMLLKGRVKGQFLNGMELPFGLIDPIKYELLKLIGRLGDPFKNLCSHSLTPRLLIDSLFKNQAEITFDELCYRLEYKRKFLMPSYTDVFLYEKELLWQQWIAVRNLKEVSPETPENDHERVHKILQADETTMPIVMIRVNREISNQGVHPAILKMFFNFLNVEKRPGTLNRDYALLKLESIMRKLKNRDFLEGIKPDYIYFMLNEQAKDAFASYNQSEFDRSYQEALNHNSLKQNLLSQNATY…
PVX_097005	Pv	OG4_118767	+	-	hypothetical protein, conserved	plasmodium exported protein	MAPSKSVADNSVARNRTDKIKEPAHSTGAHVTSSQPICRRAKMNVVMLLLNVVALVLVFWQPLCSHDLNRPSDRCKQAGKRAERVLEAEHASPFEECGQLFGQEDEEMDNYVTLISTYPVHNVDYDEQQIEQQNNMNDIEFEELFNRVNTLWNETVENMVNEYITYTDSHHMEIHWRDEMWNQRWYKYLESIHADLNKFINDENLSFETRENVAEDLLFWANEDFKWFLNIVKEEWDNKITYSPEVLITEV
PVX_097655	Pv	OG4_13743	-	-	50S ribosomal subunit protein L28, putative	50s ribosomal subunit protein l28	MQSKCKNKIYSLARNVYIIFYVIIHLNSLLLLGVSTVIHKKDENRINFQKSFYVKPLIKKSDIFKNCTLNKRLHGTNFCLFTKKRHKEALALRKYRMTGPSTARRHHGLDGRKRINKVTMLPHKEIKLPARRCMILGKMDNWNARKISKSGVKTHRKQRVNLLRKRIYFEEEDRFVKLRVSARGLKTIKKYGLGYCCKKFNLDLSKKKYDAGRSPRRKKKKTDEFASAQNDAFNQRAPQVHEDANEILKNLNLDKKNK
PVX_097830	Pv	OG4_27871	-	+	hypothetical protein, conserved	hypothetical protein [Plasmodium vivax SaI-1]	MGARGVLTLLFCMWGTRLIGERVSGVFAREKAKRLNVGSPERGSLSPLRVGRTKGGFIRCIVGGKERKNLHEGVDFPRGSNPTRVRKTSLFFSESPEGVTSSSVWANNHGGITLMGAPNRSEMNIPRRVHRNRGISSTRQMRGERSSFFRLGAKMPVITVNRKLFPKEYSTDYEEILRKFDVTYINYKTRLRSKEEIDIRAIDDLYGQIYDSSVLKKQFYFFLYHDDINTCHRVLNENRNVLTREESFQMLNSLPYIFFNHLNYVYPTESNVDRVLSQLVKTYIFQYANDRNVDFLNFKYKYNELDDYCLGLERQFLAGGVSGGEVSGGEVSGGEVSGGEVSGGEVSGGEVSGGEVSGGEVSAEVTSGEDTHTGGGSGEDTHMATAKVADSIYDDGRDT…
PVX_097845	Pv	OG4_53798	-	+	hypothetical protein, conserved	hypothetical protein [Plasmodium vivax SaI-1]	MKLCRAVFFLLAACALHLVACRSGGDEGVAVGAVGKAAGKGRGVPTAGKTANGKTTNVGGVASQAPTKKMHRVISEEEGVQDGPNVEASEGDTPNGDAPEELKKVRAELKTAKEELKTAKKEAKQLEEDLQKAKDRALKCEKQKRETLQAAQTAQKNLKECTESGALNLTQCKAQLGDREKHLDVCRENEDKCYAKMKDLGKQHEERVSRKEDEAAQLREKVLRLERALEDMELKLNAHSQSKPPSTLNENSSAGGGGRHGEGEDSDYLISFPMVRSYFVKVLKIYKTFYIIAFEQTNLAGLLSQVALHKDALVTHLKLYGRLTMERLHDYESFIRESDWVTRLMSLYESSPLSQYAQMMKRKAASFVSTVRRLLLQKVVHPVSRELYPQMIQSMRNKY…
PVX_097890	Pv	OG4_13519	-	+	histone deacetylase, putative	histone deacetylase family protein	MTLPICVLLPLWVLLPNCTAARHPSHPVCSPKRGSPLRGVSYLGGNKPPPNGVTKRNMQKMKLSQNSIDLLIDKFLFKFEKKHSQSGEALHVCAKFAALQNELNRFSQLAFFGGEGNSKVVTKQKRYSSSLSKNPPYVFHPIYSSVPMKEKYHRFKIKKYEKIFSRLIEEGIYNADYAIPSCNISETIISLCSIHDEAFVEEIFSIVTRNEQVEKYELTLHPNLVCRFLIEINGTILSSLLAMKHFMCMHIGGGNHHSKRNRGDGFCIFNDVAIAVHFLLSHGLIDKAIILDVDVHQGDGTAEIFRNCANVKTISLHCRDNFPPVKAHSTIDVEFDSFTTDGDYLEAYKKVLDDIAAEQNCIIFYLAGVDISADDDLGFLSVSDVGIYQRDLMTYQMAH…
PVX_097920	Pv	OG4_43900	-	-	subtilisin-like serine protease, putative	serine protease belonging to subtilisin	MAIRKYHYAFVCLLISGMVNHMPVQHRRHPRGDAPARRKHRAVGDDCGEGRASLIWFQGRVLRAASSEVLQGGASQPGVSSSSHSSSHSSSHSSSHSSSHSSSHSSSHSSSHSSPHYSPSFWPPPPEEQHHSDEVPTKLRSKLIIKFKQQENAPQFAPMKENLVKLLGSCGRVQKLSHVDLYLYETFPKISERALGKCLQLLSSARVLVEQDQQIYPVEGGCSTGGARGTGGRSGKSVTGGRTPPGSEATFQPNNQLPFKKFLSRLQSDCKGTNIIKGYDQTKMKEGTELSEPHERSDVNVCIVDTGVDYNHQDLQGNVVHVKHGRDGSGDGSGGGGGCDGGGCDFARGMDNHGHGTFIAGIIAGNSQRDSQGIKGICRRAKLTICKALNSKNAGFVSD…
PVX_098040	Pv	OG4_44547	-	+	asparagine-t RNA ligase, putative	asparaginyl-trna synthetase	MGATFSRLALSTTLLGLLARGVHRGEGRAEASALALQLCGQRGRRRRAGRRAEAYGGRAARRTEAYGGRTTRRTATSGGTTRRTTPGGTPLMRGAFIFKGNAHHSWCISRGTPNALGWSTPPVRRRFFAKVRGGSGSQGGGHDGAHPGGAPNESASVAPHPGGAPHESASVAPHPGGASNEGTSSELLPGEASNERTGRTKIKDILRAQGTHSEGETCTICGWVKSVRTVGKNRFSFIDVNDGSHVKNLQVVVDAGIPNYGEVSRVLTDDAVECSGELKCSLGKKQRVELCVRDAARAHYVRLLGRGEGARSGGGSGGGSEGGSADGEGEKRDDGEGDRRDDGEGDRRDDGEGDRRGKHYAIAKKYHSKEHLRSFPHLRARTKLYSCVFRLKSDVVAET…
PVX_098840	Pv	OG4_11632	-	+	formylmethionine deformylase, putative	peptide deformylase	MAKWKGKRLTLTLTIAATLAGHFWATCFAYVIKQRGSLRLSRYGIRGREKSTAVRMSASQNEKDLKIVLYPDPVLRKKCDEVVHFDDNLRTLVRSMFNVMYESKGMGLAAPQVNISRRIIVWNALYEKKKKENERVFINPSIVEPSLVRSKLVEGCLSFPDIEGKVDRPSVVSISYYDLDGNKHLKILKGIHARIFQHEYDHLDGVLFIDRFSQSERHKVRAKLNALIRTFRSNCEGEPAI
PVX_099020	Pv	OG4_48101	-	+	hypothetical protein, conserved	hypothetical protein, conserved in Plasmodium species [Plasmodium knowlesi strain H]	MKGNGKIAFCALLLFTVFNIQARKSNRLSEGTTLRGATNNWRGRSITPNHPFTCNCKLKTPKGSFKFINFWESRKPNYMNHAGHPSTRQLPVRPPRDMWKEDSRKSGFTSLQKRSGGTLIFPMRGAIRCSFLFNKCDGFCGNYARRVSRAQKNYTSEGGNFVALEKVELLSPDLVRYKYAPPWGEASTGRGDTAKGQIGWGDIRRRDFSLPALPRGGAAVVSSPEVDPTSTIASISDAPPTRGNFYTPCVVGKRGTDDAGGPPRSAAYGSALRTTECGSWVGSPPEVCSRGGAQSAAQSASPSATPSTAPSTAQDAAQSTAQPSEGRTKKKRVLSEEAKRSMREKLRAIMRSKWREPEFRKKMMKSFKKRGLEHNKKISEAVKNKWQNDVNYKKKTLDG…
PVX_099090	Pv	OG4_48490	-	-	hypothetical protein, conserved	hypothetical protein [Plasmodium vivax SaI-1]	MKRRTDFKSICVATIIGVCSGYYIFNPIVAKMKDNVNNDGAEMWAHEPGKEKIKINAYETSFRLARDKIEAKDWKDHPSLDGESPQVCPQSDATSLGRGNKKLRKFKIVAHGRSHLHGDAQNGNTVERGIRTDYLGDKFSEGHQDGGEVCPDRGEAGKGVNPFVSNEEGVTQGDGSEAGGESINSFTQLGGSEAGGGPTASFPQRTAKESKPHQFLKTLYELIGEKRDISEETANGLIEQMKEIIQMEKNLKMVFLLLHTMSKLVCIHELVGKLSSEIVKVQDSELLSIIFRIMVNCHYTDGELLHVLVNKLKEHIKLGTCTTLAISNSFYSFAMLHRENLIQLEDIPMGEIIQIIGNYYSSFSHAELFEIIEASPHFSLSKEKSRNGEVGQTGKAYQH…
PVX_099140	Pv	OG4_10811	-	+	Met-10+ domain containing protein	met-10+ like	MFCGFLLLWPLLPLCLEHVTSLRKKGKPTLGFAIMRNAVDIKTLADVKEKVKHEKRTHCLVLNKYRVNELLKNKDAKIWFLNIFRFPSVLKFREYQGCLVETGPYDGEVLRFIHSYVESLGGGEVSGQVSGQVNDQLSCQMTSHANDSQAGTPLADAPLADCRLIPLNARFNRALHELMQREGKGVLEGVDMRPEEGDERDVAAEGGGVEDVAQQGAAHQDAPPALEKLLRVIKAEGIQIRTIQLQFGYDNMNTSQVLRKVFPSESEVIHKYEMIGHIAHLNFCERFENHKKVIAEIILDKNKSIRTVINKKDSLKNVHRTFTIELLAGEENYLTMLRENDIKVKLNYELMYWNSKLKKERDRIYSLVENNSIVVDVFAGVGIFSLHLSKKNCLCFSND…
PVX_099430	Pv	OG4_54834	-	+	hypothetical protein, conserved	hypothetical protein [Plasmodium vivax SaI-1]	MTPLFFIFSFFLSLSLGEQICLGAKRMQRPLNVYYRDYSANLSNEQRDKLMNIMLHEGDDKPQDDLADAFDMNTLHAQEGELGALVKGQTELSRQMREDLRGRTRKNRRMSIRYNHGEKGAGGGDSTEANADGDHFDVDTEIDVPTELMREPVVLVKIPAVNIYDQMEMLHDVGELMDINNEDVFY
PVX_099490	Pv	OG4_19709	+	+	hypothetical protein, conserved	fe-s-cluster redox	MRRSMLAGSFTLLLSLFLCAKNAGSLKHPQAALLFVHNSSDLFQNDTLGVLRNKTKIQNKKKISRFKIQSSEERHTDGGLHYDLTPENVEKVLNLIRPKLQIDNGDVELVDIKNNDLYIKLLGNCVTCSSNSVTVSQVIKKTLKMYIRNEKNEEPNVIITNFDEINEENIHSCLSDLKPYFDFLKVKVVITDLMKNKENINNSVSLVFKKADLEGGSDADGEADVEAGRSADPYADPDAEPVKIPFSVKSEITERLKQKFPTLTVNFEN
PVX_099680	Pv	OG4_11662	-	+	prolyl-t-RNA synthase, putative	prolyl-trna synthetase	MMFCSLVLLLHIANYLRAVKSVHIGKGAFLPRAPLTRGGSGGSGGGSGCSGRSPRAAVYTRSNHSCMGSESIFNKICNDTDKQSGDKASELLQRANYIRDVNGLYNLLPLGYKSIEKIISFLNTHLKRVNSHCLFMSILQAKKWWNISDRSKLYSDEFLHVYKQKQQKGDSNKGTEAVMGKKKMEDDGLILSPTCEEQAISLINQVYNENIPAKSLPLLIHQFNYKFRNEKRLEKTLFKSKEFLMKDGYSFHSNDICLSETYEAYKECYEKVFSHLKLPFKVTKKRKMDKMNALESHEFQVLCRDGKYKEAAHIFKLGDYYSRKLGIKYLNKRNEKSNIFMGSYGIGIYRLLYFLVDSFYDGEGIRLPAQVAPFSVYLIQTNQRSKYSAAKVAKIGKLA…
PVX_099745	Pv	OG4_16216	-	-	transporter, putative	membrane transporter	MTAILPQRAIPYVVLTGAFLYNLNIGIINSYGNLNIYLTSYLRHKGQNVTYRDVSFIYELTVIMLGVSMLIGNVVQKKLGERATILTCCFTTFVSFYLSSVYAHSYLMLCLFMGVLYGLGYGISFTIPLSCAYKHFKKNRGLVSGIVISAISLSPFLYCPLQTLLINRNNVLPVENIADGGGGPRERYFEDPHVLGRIPQVLFIQSVIFLIFGTCGGFFATMEVKGMDVNGGGEKQLDNGNHDVGKSGKHVDTQERSLTDVERNDEQTRITTEKQKGNQNDGTNEGDNLGSRLAKSFKKKKKKKMAGMLNDEEGEEGEDGEGIPNGNKKKKQKKTKNFILFFLNMLNINTTIFSDNNVQKYYNKKCTEDVFFFFLWLSVVLFNSYINFVIMYWKIIGIT…
PVX_099965	Pv	OG4_37940	-	+	hypothetical protein, conserved	leucine-rich repeat protein lrr8	MTIFPLKRSALALFLTLIGNSFSAKKWTTRTNCSKRISPLHAHHESELAARKGGPSFLWSSGGSSERWKGRRKGQRRRGGKLNRARGGMPLDGRLEAQTGANGDKHGGEHSGEEAGEPIDPPLDGQTDPHLDDARPPRAFTIRDAGTLVGGHVTVTNGAFKQCRGVILDVKKTDKEEYELLVVINRDESAKYPKNILNRFGKSYWFNVKDVQVERVKDLLFHRYENFYDEKGRPAEGGLQEVKERFGELSGEEESAVEGKGENAVEGMKQNAVEGKEENAVEEKEVGHLSSEDVSVANGEANAANGEAPLRPDLITLQESLLEGKRRPRKSAFCHTVVKQIEKNYMYEDLLNLYREKRHLANIVVCFYILKQLVKICSFEKESESGLSAFQKNVIHSTT…
PVX_100770	Pv	OG4_44949	-	+	hypothetical protein, conserved	conserved plasmodium protein	MSLLIWVFLLLFCFLFLPQHVSVDDGIFKSRVLNPFHYKREKKRIMKHVNSLAFLYNEFKNNVEDLEKTYENFLKALKVSKETEERLLKMNDNKTASFISEMEDLKSEYDVFKDSIEENLNNKKNEFNKTLKTTIEGFFQNSVKELKGISKYIRYINLNATNLHKIVSSIFSKAMNLSDIYEQNINHIYEIGKEYYRMKLTTLNHLLALEYEQYNKTLGFISNEKYLDNFSDVFYIEMLKNYLKNSTQKTVMIDLSNILERHSFHELSHFFNIFLKSFQKGVIIYVINRVDTNYHNNKMIFIEYFKLYELVHYIKANYGDLKIDFIEIHVFNMYISVFVNANGILYHVNYEYFLDAHSVTLYNAYNYGYFFTNQKIPDDASPASSADGKDPSNGSDNKP…
PVX_100925	Pv	OG4_12159	-	+	DNA gyrase subunit b, putative	dna gyrase subunit b	MRLAKSLPIFALLVEHLLTRTKGKTCRASVSTTGRLRGWKFLRREVRGRAPCPPPSDAATFSQKGNSFDRKKVKKRKQYFFFTNIRRAEIIKGKGREQYKSRRPFRCNDYDAKDIVILEGLEAVRKRPGMYIGNTDVKGLHQILFEIIDNSVDEYNNFECNEIKIVIHQDESVTIEDNGRGIPCDVHEKTKKSALETVLTVLHSGAKFVDDEADAQLEGGSSVGGLSDGGGEDQRGATGEHKGEHKGEQKAKARVAERGAEKLDEKKSPQKTPKEAPQKSPSQMYRFSSGLHGVGLSVANALSSFMKVKVFRRGKIHSIELEKGKVVTPLSVRDCPVSKRGTQIHYRPDPTIFKNTIRHNAEMIRNRIHQLAYLNDRLSFYFYDERAAKKAAAEAENAA…
PVX_101100	Pv	OG4_11154	-	+	glucose inhibited division protein A homologue, putative	trna uridine 5-carboxymethylaminomethyl modification enzyme	MVTKLLHLVATQTVCYVVVMLVAVQLPPPCRTHRLGERRLFLGWPHARKPSPPRSSPRVYLLSEKCNCKELDKNYDVIVIGGGHSGCEASHISAKLRAKTLLITQCRESIGEMSCNPSIGGIGKGILVKEIDALGGLMGKVIDKSGIHFKILNVRKGLAVRGHRAQADRDLYNYHMKEHMNGMKNLHILESTVQSLLIENCRGGSPPSGRRVYGVKNKCACEFYANSVVLTTGTFLGGVCHIGKEKYQGGRIKRVSGGVQREWGVRGGEKSPIRENPLRGEVPTGANPPHGSATGEGTPPPGDGVAYTSCRGHPEKRSGATFDHPEKHRGATFDQLVESSTQSLSNQLRENQFEIKRMKTGTPPRLHIRSIDFTSLEREDSEAENPFYFSFLNSNKVNR…
PVX_101270	Pv	OG4_42827	-	-	hypothetical protein, conserved	conserved plasmodium protein	MNQPHCVHRQMNEKMTQIGSPQKDPHLNTVIRPPLKIAQGGKDKRGGVPFLVSSKNGDIQKNSEDGKKKTGHLEQCQEQEVIQEQEVFQERVGVPPRDEREKYNEFFEAKMYLPPLRASKRELNFFFKILSNAMEKNNKSNIYISLMDILCKNFPSYIGLFAHLWFQCKVLLAEKLILIEFFRQLKINSEIINHFFNYGYDSFETILSITPQDLANVQEFNKVTWLPGHTFRLKMIFSQIEKYFNLFIQQNDDYVQKIKKFILSKRRRTELTLQLSLERQQNDRGQCPMYGPHVGNNTNLPLPPEGTQDVNIITYQQYVSDSPGKPLCLNKFENYEQVRKKNSPFSLNLKCVQGVGRNKTGEPPRGVKSKVSILITSPEGAKIYRFVAILLIYNLVKRE…
PVX_101405	Pv	OG4_33220	-	-	hypothetical protein, conserved	conserved plasmodium membrane protein	MKNETEDLLIAFLFDIVFFAICVCIWLYLRKSRDENKISDNIYILNNQTHSEVKADKESSNVKEEEGNDRRRKGNRFRTFLNIKDDKIVNTEIKYYLFFLKANRNIIFSLCILGTFLVLPLYLSLPRNDINNPSFFHYISAGSISDINILTILFFITIIYSAISYTFIYLLWKKIRPSKKKTKKFLPQNFTIMVSRIDKKEINAYKIYKYFCNLTNNKVVSAYLILDYSIVYHEQKKIFNATKNLKMLKENEEKKNIKRDRSKRFLLGFLNRRRGSKGDQKLDPKADQKLDPKADPKGKNSSPDTPLQLLTGEERLNGGVAPTGPLTNEGKDNTAGEVHTTEKDPIGGANQPSGETPLEGVTPSEAQPNNQIRNNADESDGMHTEGPTPEEQKKRKKKP…
PVX_101450	Pv	OG4_10442	-	-	coronin, putative	coronin	MSSVPYIKNLYPDPSNNLFDDLRICSRVIDSCGLACSSGFVAVPWEVEGGGLIGAIRLENQMRKPPVIKLKGHTSSILDLQFNPCFSEILASGSEDLTIRVWEIPHNDESVKEIKDPQCILKGHKKKISIIDWNPMNYYIMCSSGFDSFVNIWDIENEKRAFQIIMPKKLSSLKWNVKGSLLSGTCVGKHMHIIDPRKKEIASSFHIHNGGKNTKNIWVDGLGGDENYILSTGFSKNNLREMKLWDLKNTSSALVTMSIDNASAPLIPHYDESTGLIYVIGKGDGNCRYYQHSLGSIRKVNEYKSCSPFRSFGFLPKQICDVYKCEIGRVYKNENNSSIRPISFYVPRKNPTKFQEDLYPPILMHDPDSSSRNWINGKDNKMERINVKDLTQDDLRITK…
PVX_110955	Pv	OG4_76722	-	+	hypothetical protein, conserved	hypothetical protein, conserved in Plasmodium species [Plasmodium knowlesi strain H]	MLKVVSVSLYLFLLPRRFCSGSETLGLESERGWGGAIGEKSHLRGGSLIGELYVDGWSPIWGTGIGEAASPSGIDTTVDALLSNDVGKTQQGDEITKWDSLQSLGDVKKEALFGRETQLKSSHLLGQIGYPNYDKKETKNFKKKKTKGNSLLRCEVHSGSAWRGSHFCRCVYGNYLVHSDGPPAGRNNEPRGERVPSAYATIPAYVCQPRGVHEGRSFPQRDGPNKSKSLDRANHLLPSLVAGNYEKKRKADKRTAQKNEEEPSENFLISLIKEKRERERSENEEKEEEEEEEEEEEEGDESLQNDDEYNLSENDDDDEGLADNDNLNVYAIEDEVDEESNGRGRNKKRASNRNSNPNPNWKPAENKRSQKRSLRQKKEVPRDTPSSIFNIRRYKNLHK…
PVX_111015	Pv	OG4_10825	-	+	50S ribosomal protein L27, putative	ribosomal protein l27	MKIHLFFIFVALIKCAICAKKFAHAGKYAGTYLRHRGAEEMTRTTQKRRLHVNDINASRKSVVTASHFKSIPFINKNYAKECFIKNHDQVVSIAQFRRFNKLWAKKKGVGSTKNGRDSNPKNLGVKVLGNNFAHAGNIIVRQRGRTFKPGHGVKQGRDFTLIATKPGKVHFFNRVVSIVDVSDPKPMTYADVYREDPTILTLSRVWTSAK
PVX_111130	Pv	OG4_48144	-	+	hypothetical protein, conserved	conserved plasmodium protein	MKELYLVCVSLLVCLFFAKRVTNEELLSVDRIRHAMRNYSVMDESKGFSNFALLYLYNALRCTLTQDAFESHEDEKYRKEISLVRHNLLRLRRNRADRNLWLFFEFDLLDLLVSATGEIEANLRNYDVGLLEMYNELRLSDFTFNRVANLELDICANHVFSVEEISLHLTVVPFLLEEADVTAQLYTREMRQALWKTLNFFNFCMLQINEHDMNIANMYQKEINVFLKVADKFDFISVNEENVMELHDEIHLKNKYGKKLLRNFFIFLKMFLFYQVVDEFEYFHYIEVVPIYIRTKKGTMKSRSYNMESVFYPLVEGVYKQDLKINEGILLIRILKQYSIESHTKLGYYYDSDFIYKAIIYESVLTSSSEPSSAQPGVKFEPLYSQNMDVTKRALPADE…
PVX_111240	Pv	OG4_48350	-	+	hypothetical protein, conserved	conserved plasmodium protein	MKTHRLLQYVAVLYFVLTCLNRSHVRGAQNNRDGLAGLDDNALVAFLLLVQLEVPHFLEPLSKKEKYEKVIDGAIYLFTKEVAREGRAEEQRGYTLQDVRHVITGLNTLLNDIKSGNERYFTWMDLIANECWREADGCRALSTRSCALSVLNALPRKTLPVTCRSCVMYALNYALHSKLLFANLLQVQNCNEERNLKLIGLSKDVGLVREYRIYLNSLEAISAAKNVRSQVLILHIKNGSKLVDMLKTDGHERFTQVMSDALLEVIKKSIGTYTKHLKHDSSFSQNGETEIKLDGANLISLTINGYLYLDQTSGEILRLKDFGLFFAEDSLEQFVSMLTGGNLFLQVEMGTPGGGEVPQNGDPPLVGDPPQNGDPPQAGDPPQNSDPFPIGNLLTLIEF…
PVX_111405	Pv	OG4_54914	-	-	hypothetical protein, conserved	conserved plasmodium protein	MNAQTLKESDINEMILGLMEKKKRGTVARKKKAKKRSPKESLTKEEIKRLGEEQMERKDNTRARRKATNAEATFKRQEQMYRDEEAHTLQYIRDAAASKEKELNDYYAYCQKFKNEYKTNFNEALKQSEEMRKELSNLRSEYQDLKLLLEDQRKVELTGMFNFYQKKLLDIKAHCISQTFCDENLKNIVYEILRVIH
PVX_111440	Pv	OG4_34263	+	-	hypothetical protein, conserved	conserved plasmodium membrane protein	MNEREINELEEIRNAILRRKETGGHDYASVVNAILLVAHLVLYASIVVVHFSHRSDDFTSCFHQAFSSVVRNEYASGPEIEAIQRELSGMTHVCNYGRVHFSRYALGGGSDYVLSFHNSSANYSVAFHQLFHSAIFKSQSSISIGHAYHWHEWLLFLLLNMSALALAYRKCISRGKKMNLLHLCLVALIDLSILYEQFIDTVENHSVHEKGVDLLICSYYLFLLLTILTKISTHWKVLAFPVQIIRTTVEHNYMLLLFLLSFLVLILINYFSSGEKLKSYFTSVFSFEDDSKYKNEFVYNFFVVIIYNFFFVPMITVASTATAFLLMNKHGDLFEFKPRSSHLWAKLRDYLFFLKEKNKRETPGRRNEMTYEEYEEKKIKIDILKIGSVILFFLFFIFF…
PVX_111575	Pv	OG4_13559	-	-	4-hydroxy-3-methylbut-2-en-1-yl diphosphate synthase (GcpE), putative	4-hydroxy-3-methylbut-2-en-1-yl diphosphate synthase	MRHAKKLLLFMVSLYFCAKIKKKKAPAKGLPTNVFAKVGKRDKQNVYLFLLGTTAKKSPNKVFSSEGRKNKKEGEKIKSVSSLTDEDKYNLIRDLKKYCECTKRYRRLPTREVPIDNIKIGGSNKIAIQTMTTCDTRNVDECVYQIKKCKELGADLIRLTVQGVQEAEASYHIKEKLLAQNITIPLVADIHFNPKISLMAADVFDKIRINPGNYVDGRKKWINKIYKTREEFDQGKLFIQEKFIPLIEKCKRLNRAIRIGTNHGSLSSRVLSFYGDTPLGMVESAFEFSDLCVQNNFFNVVFSMKASNAYIMIQSYRLLVARQYERMGNGLLFPLHLGVTEAGFGDNGRIKSYLGIGSLLYDGIGDTIRISLTEDPWEELTPCKTLIKNLKKRVFYDDH…
PVX_113280	Pv	OG4_48376	-	+	hypothetical protein, conserved	hypothetical protein [Plasmodium vivax SaI-1]	MRTNLPRNILLAWLGLSLTVALCKKMLFVDLLNGVNVNYKRKVPICKRPTRSAEYLSNQPLHANRNVEQTSSKNGEASITNHEDEKDENILQQYIYTLSHLTIFDVDRDKSTPLNIALLLKACLASHNYIKNVEIFTSNVKNKEICSFIYERRNDFDAFFKLHVMKYIDFFGNPQIVETLKSSVDNKEMYQRELEIFNQIDGETKLRKDLLEDILFECTRLNKIIQYSLAVNNFNLFSPTVLLKLFTYFKHYGVYYSIFLNNIKKVKYYYQTKDIREEDKRKIEKIVDHYLLTLDRFNHMYEAGHVTL
PVX_113780	Pv	OG4_48231	-	+	hypothetical protein, conserved	pfs45-48 related	MRVGHFSFVRLLLLQSLLVQRLPVQKQQQSSIPARKHPEEEGGGPSPQNALAQVANQMKGTCDFSRAPLNVSCSENEIVALPGGEGAMVSGTTGSTANDERARHCVQFTKGFDVLTFVCPKRSSEDYSGVEIRPMSCFETVRRTDGTNQQLSEVLKGVQLENRDTDLLSIRRVFIPPTIYQNFIFECSCDNSLTFWKNKMGARGIMRVHLRRNILFGCDFDHTGGVEYTGGLGGELPMADEASVGSAYDRSAGGGSAEDRSAGGGSADDWAFWRNAGPSAEELAEKNKTAFTNFYPPGEVSLAKEKGLVCDVKITKREVYLGLVCPPGYEMYPSNCFERVLQKDGSIVRVSELLKHDVSFHADGNRRMSFATFTLNRNENPQGFSCMCLNVQAPEAPPL…
PVX_113815	Pv	OG4_54908	-	-	hypothetical protein, conserved	hypothetical protein [Plasmodium vivax SaI-1]	MHFEQREKHTQTEELEAVTPKYEHPAKDGCNGRGVGSLEDNSSRGKMSVSSVETICSYSSGGVREASQASQTSQASQASQTSQASQASQASQASQASQASQASQASQASQASQASQASQTSQTETTHRTNISNRSDVKNLANVSNRPEVAARPRERGRAPTPDHSACTQQTALSCALGRISSNYVIHASNKTNGAGEWGSRVSTSNAVSSLCKATKIISLCEDPPVSTTYIGNGTDGGKKAEELAQKSVTHVRGCQMDSHQVGVTQTESNSERGPENDGETNRDPDRSDDNDRCNISCEANNQLEAVKNPSYNLHSSNKRVIIQGIKKNCQTNGNAFTYLNEVLEKTYKETVELDGSEYILLYDICVQDGGDGAASHSGERGNSTKNVSWGGSPASHLD…
PVX_113955	Pv	OG4_34486	-	+	hypothetical protein, conserved	hypothetical protein [Plasmodium vivax SaI-1]	MHFRLVCATLGVCGAARSAALSTEPLQSCLHRGSLFIRRSPRKYEKKVAKKRESKVTSCRGEDTHKRSSRSAAVISTLECPIVGVPVGFPLHTAQHGEHRVENNGGRTFLSPIIGNRKKVTLSLRKEIGQRHFNSTKLNNLLCMQFLPDFSNAYLRYVLEKFSANDLPVKENVLFHLTLRYLRERTTTSVGGKTSERDSQLINSIENNSYKFIADHARVLKKCAKGKKQKEANFGHCRTEGRAEEGNHLPPSQNKTIDAYLKMKKKFNIIFVSIKSERNIYRVFRKIKRNISFYDFQERLAILCFFHRHAQHRFALDFFKKYIFSLKNENNLFVLHLVSSLGESTLLKRYMLVPHLTYHAILSTPEGGGGSCGDTFKWSFLPINACNYVESYMKERFFL…
PVX_114030	Pv	OG4_41528	-	-	hypothetical protein, conserved	hypothetical protein [Plasmodium vivax SaI-1]	MRVPLPPGPPHLLRWRRWANRVAAVRTLATTHFHPYRRVTTLQREQRANRWETELRETIQRVDQILRENNFEVYIQGMGDGGVAQAAAKEVDAYKLLHLLNRILLLSREAEGSSEAETTIWECPTFLSLLGFIKLKMPSFNIHEMFLLALCFSKIQFMPQMLMEPFLLTVQEGPYLQGFLEADVNKFFQFFFIVSSIKNVRVGEKADALFGTFAGNFVQVVWDFLAGVSGHVPCRQSRLSGRLPLDCCHLLCVALHNARVRNAPLMHRVATELVDHLNDHHRLDKQDQVDVAKKLINIYLAYASLRCENYHLYEKLNTFIYNLVEDLPLASCLTLLLSIATLKEQSGFNFPLCLLSSLEKRFSAKFYSLDVKDLLLLIYLLTYLNLHVANTDAYVCMLD…
PVX_114170	Pv	OG4_36522	-	+	hypothetical protein, conserved	hypothetical protein [Plasmodium vivax SaI-1]	MQPLSLLLVAPTIAKCNTCNTFRIALLHLCVLVLSLIWLSQKVGSVEAYRVTRGGDQLGLFPNAGAKGRRRFSPRRYAKKGSGTVDSGRAGGESAMRPSEEPPPVAKSTPNSYFNSLCCSSVLNKSVDGHVNFEDGLVSFFTLNPNPNIGFLVGRGKRRGGAAKETDETGEIGAADETNTNDAAPPRQRTQKIRLKLKRGYMNEVYAREKKRLNQVLLSFKDKSIFNAPKKKIKEKILLLNGQTVNIEVIKQYLFHKLRLEYYESIRDQKKILTLDLWSKEINVSVENLKKLIVYIYKMKALVQKDDEELLIRTYFYNKTNMFSLFRNGAAGGGDVVAPFDFSVPEVAAPVGDQGGAANGGAANGGAANGGAPNRGDIFTDYFDHHEVVLYEDCENLIN…
PVX_114215	Pv	OG4_48315	-	+	hypothetical protein, conserved	hypothetical protein [Plasmodium vivax SaI-1]	MHHVWLGTLIILLHLLVRCTCYQMVYVAFLQKENDSSELNKLSCSWRYYCQEEFHFCEYGCSSKKSLKAGYNLLSTTNLRENCFINVECENHQIYFDTEDPVHFLFFAKPFFRLNRGFTLYVHLARRNDGAGERAHHGDDRTETTIWRLLRLTWKRTNEWRRYISKKHKRSLIKLLICLILIHMILFYLYIYTYLYLDKQEEL
PVX_114250	Pv	OG4_48413	+	+	hypothetical protein, conserved	hypothetical protein [Plasmodium vivax SaI-1]	MAPFPHAEKCTHLLVALSSCFSFRSPRGASPNVGHLMCSPAHSHGQRKKGIIQRGPLTIRASHNFLSSITTPLLNENFKKYFAFRCLSRICVSLSSAFSLNAKIHLYRKNSNNLLLTQVLLYNEILVKVLKICWLYKLRSFVDSNIKMCRILSTVFYVTGIYLDLLSTLEIFKNSFFFPCALYVLSSTLKSLSIMTYASIRSATNLRLCEMLNGPGAGAPGVLHNHSNGNNNSSNSNNRTDRGEPTHDHLPTEEQTREDTDGAKPKGDDVAIRLGEDAHAPVLGAEQGGDTPLESLSNGTIPHSEHGNHCSSRSSRSSHSSHSSHSSHSSRASTPANGVKKTYYIGEVSVLTDLLASLVDLLTVVLLARTTKYIERKIFFYVILSALHLFFSYKELQCL…
PVX_114325	Pv	OG4_45974	+	-	hypothetical protein, conserved	splicing arginine serine-rich	MRKRRYFTSEPPPDVLNYLNTKDTSNRNGSDGVDPNEQDIFASYLPRNNQNVCFPKSLREHMIVEYTAMFANSEGDIAEFYLKLDNDVLINFPFLHVDHPLHRYYELVKENTNRRLIDDYPNSIPLALRGLFGHVRQLEKEKVSSNEAKANMLREKQKISMRDAKDMKAKLSEREKRKKKQTEDQSYSSLFMKYMESDDETEAKNVQQEKPISNQDLLEMDQLINQILHSKKELPIYFARLLMRCIEKLKYLQYGSKEYAYFSERIMPGKGSPKGAFPNVTSADFLSLVFLLDEKNLAREKAPEGNTKEDPVVEEKDNIKTIQECRRERAKMILQEFKKK
PVX_114465	Pv	OG4_45892	-	-	troponin c-like protein, putative	myosin light	MEELASEVELTSLFNKLSDGSKNVNTENALEIVYKLGYVPSKEDIDEFIRATNGICSLSNIKKFCKNLKLSSASTDGLVDVFNHYDVHRTGKISKEQFKSLFTTVGSRLSTAEMDAIISKLCSEADQIDYKEFLSK
PVX_114535	Pv	OG4_47215	-	-	hypothetical protein, conserved	hypothetical protein [Plasmodium vivax SaI-1]	MISLQKRPVWCEKKKCTLFLSVVIGKYNSSDGRSDWNSNTSCATRSNFLREQKKKKKNLIKNGRSSSLSSKMPSVLCQFNVDAEKRIFFHTLFNFSLVDVLTIFKLLLQLRKITLYKHNGNILFTVRETKKGDDSYKSAIRTYLLFLKKYLSRNEHAEDALLQLFRGLQFEKQTERQIDATTIYDGRGSEDIPTDGYARKGANKKKLTVRYILKKIIRKLNVDIRQKGYINNVRDKSFLFKFLVNKKKFRILSFYKKIKGVYYLCRNVMYVQVNSHLQKDIAVMSLVSTNKSFFKIEKSRIAVDPFYVKYYYKYHLNKLLSLSERLFLSGGNLIHLSQIKTCIGKSEERGQGEISSQENTPIWSTRTIPNEAENKNSIKTNPVITRLKKEGINIKVINV…
PVX_114565	Pv	OG4_11521	-	+	phosphatidylcholine-sterol acyltransferase precursor, putative	phosphatidylcholine-sterol acyltransferase	MSTLFFLIALWHLLMPTSPVLGFTPSIRDVANVFLSSPYKLIFVNSEKRGDVDHAPYEEKKKLESPGAGAEREEATVSVVQAKPEGEKTQGGEEEKEEKAPKTGVATEEVTAPAGEVTATQEVVAAAKEAAKVEEVVAATKEAATVEKAATVEKAATVEKAATVEKEATVEKAATVEKAATVEKAATVEKAATVEKAAATEEAAATEEAAATEEAAATEEAAATEEAAATEEATTTKEAATTEKAATTEEVAGPAEEAATGEAAAPAGDPARTWKKAKGKSNESETHVVGSPLKKKKYKFFWKQKPNKNKRKGKKKKEPKDESQKKEKKKFPTTILLPGVGGSTLIAEYNNAVIPSCSSNTLNSKPFRLWVSLTRLFSITSNVYCTFDTLRLLYDNEKK…
PVX_114780	Pv	OG4_54946	+	-	hypothetical protein, conserved	hypothetical protein [Plasmodium vivax SaI-1]	MHGLYRKNQLSTPEEQLCTNAFWRKNLFSRYEIKPKYFNVPTYHVKDNANECFERVSNNSWYDTSSFRKKGAFLFCRELRNINWGSSHDGGETHLSEALHDVVEASTNGTLPMRASGEDAKNLDECGGLPQNVVGSNPNDKALNDKASKEKKKKKTLPSPNGGVTPTGSSLTLYGRKKKPNKLAKMATSKKADNVKNEKWAPESCKPSELEPAQRNTHKWDATHLVSGKVCKKKQTSIDIWKYKKEEILKGHTLHEQVSEKIISSKPSVEKEIMCVHKLGVLPLDDKVRLDKSGKGQIASSFKKTKEKSVHRGEHLAGVVQMTPSKGDAKKESPIRSYFPSEAAPVSVIPSGGYSEGGNKIEEKNTPIGEEQIRRIFHPTGNAKSMARETPLSKGTYTG…
PVX_114977	Pv	OG4_11916	-	+	hypothetical protein	transmembrane protein 111-like	MDALMLDEKIRMYALVPIFIIVVLVCIIKSNLGQMVRPTIKPDIEKLRQSNFLTRFTQLKTNYGFISPVAFLSRKYFFNKPQAGFFNDLPEQVNPFDALLKQDPSDLFGMMKNQIPFLVLQLGLGFLINLFFSGYLVAKIPFPLTYKFKSTLQMGMDIELLDMKFVSSLSWYFLVMFGSSGLISIIDYFVLHDKDRSQNNPMDNLMANQNPLAKQPANMNSVPDLKKFYDKKKAELENVRYKFWLENIEYHLIVNWK
PVX_115165	Pv	OG4_84674	-	+	hypothetical protein, conserved	cysteine-rich surface protein	MHIFKLVSILLLPFFKSLPSCADVSLAGEFQSKLAYDGGQIVYSKKPFKGSIYAFSPIKGKCAISVKATTDGVEWESKSNIEVEDGVGGATIFSLFTTDEITAIFRCSNVYYIAKMGGENFWKNIKQVTFSDFPVDAIPAVYSGSYLLMNSEYEKFILVCSREDPNGSERSSDGEVKAVPFSELQLLGRCKFSFDEGNTWKEGATRMYSDELSNDDGGEDSTELSGDNTWESVKEVNISAEEDVKLEDQVKEKSQQGAPPSHATQLSLTQMGGKLAIKAVNVRNGGSSSKTVILVCNSLYKNDLYCDKMKLQINDKYILHTYEVVNGYHMAVLREKNGTHLVPSFVYNLSETFEPILHYKSEKNREGKSDVGEGNPLDKAAYEFVSAKGEVVYLFCHTV…
PVX_115190	Pv	OG4_10136	-	+	oxidoreductase, aldo/keto reductase domain containing protein	aldo-keto reductase	MKKRDALRCMHALCALFLLGVEANCNGVGLLSGESRVACALKRGESSGNSSANCRVNCCANCGGRRGAALKRRLRGEHTQPGWNKQGKQHAVRYFITPGGHPPREMDLGTKGRTKRTARAKGTARTKRSEQFALHMDKRKGNSNDDLFSLIREGENHRGKAFPTGATNQYGKDKPGVEAPQENRLPLKEDDVTYKYVEEMEAKKINIRGVDIEYRVYNLEEGIYIVDNANYEKIKKLWDEDELKKAKENFQGSFGIKNQGIKEEDWIMLPLDYDEDKNIKLVKADFDNPTYDYIITYYDKERNYHFEYKRRNYYKPFRNTEHETPPYKSELEEDRRYYGKEIIIPKKKLDNEIFRQPMLSDVLTGGCNREPIGLESWRYVKYPYGNLIEYQKYSQLYCV…
PVX_115215	Pv	OG4_29702	+	-	50S ribosomal protein L17, putative	30s ribosomal protein s17	MIKLSGIYSYWHYKAWQRATAGYLRTFIKNNLANNEMVGYVINDKHPKSIRVACDRYMYVVRYKKTFRYTKKIWAHDEKSEAKIGDIVRIQPLGYRIGPWKNYILVKILYKENKE
PVX_116500	Pv	OG4_15045	+	+	hypothetical protein, conserved	nicotinate-nucleotide adenylyltransferase	MFSFVRASSSPLKTMARVNVCSHLLTVILFLFFFFSSSWGQPKMNKHICIYGGSFDPITHAHEMVLAEVSSLDWVDEIWVVLCRCRNDKHLTEFQHRHNMFSLIMNNNSPKMLKNKIFLKDIECKETTTPTYDLLKMQKEKYPNYTFYFTIGSDLLNDIFFWDNGEKLVAENNFIIVERGNFKIDENVLKKFPSYYLIKIENMSFINYISSSDARKMLSQKNNSEDLQKYIHPVIINYIKEHDLYDNNSA
PVX_116865	Pv	OG4_24474	-	+	hypothetical protein, conserved	dual specificity protein	MRFTERYVNLGVLLLVILFCMNKCKGYILNINVVDKDDLFIFLYKNEHLLAASYYNFKPSYFFSVEEGEINIDMTIDFRENKLVKKKNKNQEILAKANKNSINILNNFNVDREYFHKRGVAASGADTKESSKESSKESLKESLKESSKGIDGTSSVEQHASGQTHNEGSAGRSNYKSKNLFLVLITADQWLNYIRLKNKLEPSLKNEENYIFTSHFNCIKRYPLEEGNIKKKIQISQKNRYMLFLINNNKLKIDLKGNIVFYDYKTKHLSHDFLFIPNVLYFTTYVLLILVVILTLYFVKYREKTDIFMILNMLFFLLSTYFNYKNVNFIRERGYMYLYFWVSANILKKIQEIISFIIYLQVSLGDMYIRSHLSRIEIQFMICFSVISFYTGIFEIFLG…
PVX_116930	Pv	OG4_42805	-	+	reticulocyte binding protein 2 homolog B, putative	reticulocyte binding protein 2 homolog	MKPPWGVCLLFLLACFSKCSNGYRRRRGGALYNFLLGGRSNEPKGRLPRSRRRMPHEVRKKSVQKLKDVKDMHVGQLKVGRVTNVVENDIFVKLKNEENEQIIIKRENNYLLENELLYEYLHRNNFIDHAMYAKLMRKGNPKWEDQSPCVQRDQVKDCIVLVKEIDEKNRIIGELFTNEINKRKEKIYDKLSELKNAEKKIFIQILKNVRNKYFVVLINGCIKGYLLYDEKEEKDKHNVQLLQACKSATHKLSAYIIDVNKKLEYVFLTLHKIPSNEINEKLRILQHTIVVENLFENFYFKAEVSDFCNDGSNIIVNIFESKSNPIKVKIKSHNIINTRNILRNFDYLKNKVITHEFALHNSTSAEEMNEDRVSSHKMTHRRGEEGGDGVHTGEGGSFE…
PVX_116975	Pv	OG4_54958	+	-	hypothetical protein, conserved	hypothetical protein, conserved in Plasmodium species [Plasmodium knowlesi strain H]	MNYQECLHKFVNAHSDNFRQSFYAVVESSQIECLECPIEKTSTDNFLIKIYINNIIHNIRTFLLTCLSGSVGNILHNTDVDKQEARCYLAADDEGASHDGERGPTGDAAQPCQSEEGSQNGQSRAKQCFNKQEDFLRKCKKVHSLRKSLENAQVRTGDTFGFRDDILRYYI
PVX_117015	Pv	OG4_14117	-	+	translation initiation factor EF-1, putative	translation initiation factor if-1	MYRTALPLLTLLVYAALHFTQAVTRQRNLFITPLRSKVDAHKTCETYKTHKTYNGPPIHLSRWTTWRKTARRIPRRNVHGAHNRVKDSHVVKERESETIEMNGVVDQCLANTNFVVRIPNGETFLCFISGKLRINKVKINLGDMVKIQIHKLNFEKRRGKIVFRYLQHAALGGKK
PVX_117120	Pv	OG4_44098	-	-	rhoptry protein, putative	rhoptry protein	MHPANKEEGNQAPAAKLDFPDSASDDQISVDQENVWDADLNIADDDLLVLGDGGKGEAEAKPPGGSSSVLHFFFFHLLHLAGDAPMEGHTEERREDLTGGHPVGGEECQIGDPPEGRKQGGASNCAEEESQTKQTPNTGEQLNDKGSPNVNMHYDEQFVGNSGKGTNAEEPLSPPPHESNAAEEECPPDRTNQNCTNYAVQMDMLKMDPFFDEKGENRLNSAGDENVGGNLQKGSDKSDLLPHQTTPLNGSMEKSGGASQLGEEQPDVATQDGGPIRAEVDTTTQLKRQCEILKKKLKEYEKKNLQETVEKKKMLEKLQTYERNCNHISSKCDEYEKKVQQLRLQMEQNKNENKRREEEMKENMTKAGEELSRKELTIQEMKNLMEEYKREINESEHSL…
PVX_117270	Pv	OG4_22398	+	+	hypothetical protein, conserved	hypothetical membrane conserved in plasmodium species	MLRLHLLILLCISATYPLFILKEKNFDHIYCTKNESVRQRDTLDRESRSRLLGEDNNEFFDIGKLKKLLYFQSNLDQTMKKKRREEKKLRKLYKAAKAGNFAERIRNAPKDTQQSGAPPGEKENGTKGKNDTNSAGEINQDGAVNRKEDNPADVNLQTYADEQMKNEKGKKAGEIQEAPTLQTAVSGPAEKFINKHDHVENTGNAEKEQKEGKTKHADNAQLNNVLQSVEFLKKVQSLKSYFGSSESQSGSPGVPPVEQNHSADGDKMKNENDQVAHLSGDTNYGTNNAEANDKMGSPTSKDNEGKKNNYAEEPFSIFPEKEGAEKFNTHLRRNKIKEFSEVNDLVKYMKNLLGIKSNIHEKFEHEKLIVKNCNYESFGPEFCSVDEEAKQMLWNYENK…
PVX_117410	Pv	OG4_36474	-	+	30S ribosomal protein S10, putative	30s ribosomal protein s10	MNVRVWTLLLTLRCAYGRSTALRAAPEGMAAFLRAVPQKNTSPRNARVYNNLEKVNTHIKDLDILNKWKENYHLRIVLNSYFSDHLQKAVLNVKEKVSQYPQFIIAGPIPQKTIKKRFTFLRSPHVDKDSREQFEIRQYGCKLDIFLNSSVSLRGSEFTNFLSVKLPRFVGFEYYFEENYKGLKKGEVQNLKKKKKYVSKYYTNLLNGKEKKKIVELLLENAKYMNVRLPRNVYDLYKFPLHILQHYYKKTMEKKKWYHENEDLMKKIESLSFD
PVX_117660	Pv	OG4_48162	+	+	serine hydroxymethyltransferase, putative	serine hydroxymethyltransferase	MASFHPRGALGFIAPYLRAFSPVEGRRCITYQSLRNQGSLKSVDDEAFNLLSSHYKNGNCLNLSVSNNIIPKYVRDYFSLDLNKSLSFDVSHLKLIEDMALSLFHLEPKYWGCTFGVNSTGDYPPGEEDIPFLFTLFRSLINCKGRIMNISFALAEEGEANNPLIENHYDCVNVKLKDKVDYDEIHKIYDAFNPHLVHVDETNNPHNFNYDFFSSLKDINKCVVVANISNKGSLISQDFIPSPFNHSDVVYTYFNENMRAHNCHVIFYKRGYKQVDKEGKLIHYEYEKKLKNQFLPIRVNNTIFSFLTSFKMMKNAEFKEYVIQSKENTRALLSHLNKNFFNIQYAQNGNFLNLNCTVPPFNVYEFHEFCKQLNIFFDILNPFKYTQKSFNVGANYLTS…
PVX_118150	Pv	OG4_16178	+	-	hypothetical protein, conserved	glutamine cyclotransferase	MASKKHAKRKVPPPIGGKRKITPGKNIRLFRKTVVVVTVVVVLLIIASVLLILHFVSNSNSSEKFPFGIGVYTYDVVFKYSHIHDPSIGKQLNVGSNVIPINEAHSPFTQGLFFIDNDTLLESSGLYGASYIREFSLSSGKTKRFNNLKSNLFAEGLAVVVEPMTYKKFILTLTYKEKVILVFDYDTMELYHSFEHELDGYGLTSNIDLLQSVEDLKAENFARNQKLWTTTGDDYLYEIEIPHDFLSTKKLSISGKTQITCAGFAIYHVNELEYHVQAKTLYANVFLTKLVLEIDISKGTCLKIINLSGLVEQCDRYDGQKNKESVLNGIAIDPQSSKADLPNLLVTGKLWPNMFQIRLIKSVTKWEATAVLSEYFKSIGQKVS
PVX_118475	Pv	OG4_19172	-	+	metalloendopeptidase, putative	stromal processing peptidase	MIKINGIILLYFSVLNLVCCLNSNFCKSAYILYSPQSTKRYKAPFRRWNSPQNNNANELQEDDDLIKEELPNRLTSIIYKKRKSKNKKKYILSNEKHVILPSHRISNEYKNYTNPIDYNYEEMHVYMEVNTGSVNEKKNQQGISHLCEHVSYMGSKNRKNIIDKNIRTNAYTDFHHIVFYISVSLNKELYKENSLSHFQHDHIIKTVREDQIENYDIYTVDEFNYKHAILSKCIDTMVEVLKGETQFNRERIVKEKKAIFSEYSIINTVEYKMNSDIIKTLHKENRLSHRLPIGKLELLKRYEPKDIKKYFDLFFRTENVNLFIYGDVNVDIARKLVSEKFQNVKKEELTPEDMKYLAILNDNTLRSRNKNLPAIVHMYGSDCSGKGHPESGPLNGSAD…
PVX_119785	Pv	OG4_48107	-	+	hypothetical protein, conserved	pb-fam-2 protein	MHVAKLLILFWSFFAHGRIRCVCRLMRDCRLFLSPAGGSESSLCGSRAKRGPPSRGSHGRGAQLSGGQSRGDPSKGRLNRVTTPKFGGVPVKRSPNEIYLFGGLKNVFGLLNWFGSGENEKFCEDVIAHLGDITKMKQLTRSHTSRSVMEGETMKRIFRHVLTSPISYRVLNCVSYLIRRYKVDRSKLCTLLNELSDEVKEMRDAENFLALHTFFLEDQSVALFSLMHVIDFFRSKRRLMEAQDSIRKKIYEQCVNDLIRKKVIKYKLFCERRGIPFLLGDALDKIRLSEKEEDVYFSYDREELSRVFIKRVSTERGRGLGGAELGESWGEGGPGGLSGHPAVEQVAEQADEHVAGRTADHTAGSTANHTADAASDADAQAEENENLMELKKTYQEMQS…
PVX_119790	Pv	OG4_42822	-	+	hypothetical protein, conserved	hypothetical protein [Plasmodium vivax SaI-1]	METKKRGTKLLCCALGALAPAYWLHHRRASTSQRGHNGFSGDLESVKKLKMNSPLCHIPLIILSIYDGYFYESKVLRRIHNIFRERSSGKAAAPFPPLSTTRSTSRSTSASAPPHPPLLPPHGGNTTREEGRDGPNYHFLMHSEKSLFNKMYFYELVLDKSIKYAVISPQLSFYILRQLSQHVVNLNTRLYHEEEFSLHREKRGGDRSLSRSRGSGVANWVRRLPWGGERSNSRHGDIGSGSDAGGEDPHVRKKPRRGEAKGNLYERYGIHKYEWTYSQPRGGDTTPSPQQDQVSINLLYLLNKAYDDVNRICIDTDANIFVSLYTINILKFICYNSYRHVLVNSSLVGELERGNRTGGNGKWSSLVDYVCAFFAGSRAAQEGRIPLSDADRYLFCGEA…
PVX_122045	Pv	OG4_10845	+	+	DNA ligase 1 precursor, putative	dna ligase 1	MKLLVLLLIARMLLCKVNSCMRREYAYIIPLMQKNKFYRRKTNFNVKVFTNFRKSASNRRSDFLKCLSFPKKTMDEQKEETDVKEESKVKEEDKETTKRKIASDGNTKTKKAKGKSENDIKKGSLFNCIVREDEKVSDLTSPKFNPVHFDVSNLYLSQKDKEKHKFKDSLLFTFLTNTFNQIEELKGSGTGSKKNVAIILSNVFRVLIYYSPNDLIPAVYITLNKVAPDYLNVEAGVGEALILKTMSEAYSRTESSIKKDLQQIEDLGIIAESCSCKMRTIFPLPRLTIQSVFNELKSIPNLSGSNSQQKKREVIKKLLVSAKTSEAKYIVRFLQQRLRIGVNSATVLQALSYAFILTRPSIPEEIVQKGKLMNAQLLGAKGGGSGEDGTVSDSTTEDD…
PVX_122435	Pv	OG4_11305	-	+	malonyl CoA-acyl carrier protein transacylase precursor, putative	malonyl -acyl carrier protein transacylase precursor	MHLITPRTALTISIAVIKIILWNWEECKGFILKGKERAVSGLLHRGVNKKNRRRLTKEPNQSDEINEQIMTSSENDNYIKKKLKEFEKYRIATYSSQYTFFFPGQGEQYISMGLDTYNTCKNAKELYDRASKVLGYNLMDVIKNGPIEKLKDSQISQPSIYTVSIAAYEKLKQENQDAVMKLNLCMGYSLGEYSALTCSEALPFEEGVFLTKERGKAMQNCAKLYKMTTIAIVGLTLESIHNLIEDVNREMNDDIFIVSYMTPKKFGLCGKPESMKYLNKLAKEKYKAIFTKELQISGGFHSSYMFPARKALENALKQITFRKLKIPVISNVDGCAYDDPHIIKQLLLLQLTSPIRINTCLENVLKHGYETGYELGPGTINSNLLKDVSKKQKAATPYI
PVX_122590	Pv	OG4_23238	-	-	WD domain, G-beta repeat domain containing protein	wd g-beta repeat domain containing protein	MRGNYLRDGYKNQYRYANGSDGNNKMQNNYNNRRNFYQKKNPNKDRDKGITFCPHYTLRGLCRFSDDCKNLHNLKLVDTFFLQRSYIDCAIIVHGPNNEIYLFTSISPYTINVWIFVPGEGSKELDIKHLKKIEFQLTPDEEEYGEDKLKGNKKMMMKKKKKRVLSLLYAEECIFAGLDNGLIKIMHLPSSDSSTLYAHTDAIYSIVCIDGIIISSSINGEVKFWKYQESYLSFVTIKKIETKTKIFKMIEIISSKCASGNINSNANMEENKFGRTLWVCGDNITIINLLNLEIVNVVKCKYGSVVSVMQYEANVITAMSDGKILAFSLKGDNHFEMNTLPIFCMAGLTNHKNVPILIYGSTKALYTFSLPEFNPYGYLKDRESMTLKFNINDPDFILQ…
PVX_122725	Pv	OG4_14702	-	+	ferredoxin, putative	ferredoxin	MIAVILFVLLTLLTEHSNTYQFSSKKTPLNYMYGTRGINICTPQKRACSRFISKLVSCKKASCLPVGGDRGGKARHTSNDFTNGGGKRRYFKSANRNKLFYNITLRTNEGEKKIQCDEDEYILDASERQNVELPYSCRGGSCSTCAAKLVEGEVDNEDQSYLDEDQLKKKYVLLCTCYPKSDCVIETHKEDELHDM
PVX_122730	Pv	OG4_21019	-	+	glycerol-3-phosphate acyltransferase, putative	glycerol-3-phosphate acyltransferase	MLHPSNALLTALLFVTTRMTNVESVKKKPLPYVKNYNLCDRSVRGIPSRHTKGTIRASTNPITTAPNEDKSDVYTPPISSGNKVNYPTLENNTYEEALKIICDKLETLKGENRDNVEHINTFSGFLKNYFDEMKRHKTCPPQIFLENFLQYIESFKKYRYYTFPNVHRYDEALHEWSLQFWSQLIDKENSKFRGTEHIDKMKKWVEQGHNIIIFSNHHIEADANIIKYFFDIHNGSNISRKIIFIGGHKIRADPLSRPFSVSANLLCIYSKKYIENPPHLREEKILFNHKSLNALKNLLTEGRNIIWLAPSGGRDRKDPHGNIKISPFDPKIIQTFYIFAKRAKIKTHFLGLALNTYNICPPPNTVDVDEIEKQRSCAYSPVGVNLGEDIFDVYPTMDE…
PVX_122865	Pv	OG4_41949	+	+	hypothetical protein, conserved	camk family protein kinase	MKFTSFMKKIFIFNVVLSVLNKYVKREPRDFSFFIYSLKTRGFQNEDFNNGDEHTGDTSGGGGQGGENVNAPFTNAAGDNTSSTAASSSSGALGSSILIGSSANRISSISQLNATITNFFSNALAEAIGKKQDKDSPQDDQKKEDEAVENKRIPIVHTSIDDIKRFSYVKGKLKLIYVKSFYDDDGDGNGNGNDNDNHDGERNLKELYEAKFQFYKDKVIYVTTFALVKNSLSENVNQTEKWFNASMKLLQRNYYNITLRCNPIMETSYGSFSFTAEELKRFEALRKALKKRVNITHDNLFYNLDIFKSAKRKYLQQMNYSFVDPDFMSSVDAKGGHSDAADAFNLEEDLLNSLNPFDKMKYVSHRRVKNSHKIVFKKVEDRFIVYNLIRDNIIESKET…
PVX_123425	Pv	OG4_64957	-	+	hypothetical protein, conserved	conserved plasmodium protein	MRVRSFIYALAAALCINSIFAYRRLKDINNLQILSQGFKAIKPTNFHQIRSRAKASAPDQLNIDIGDWTIYITHKTPYYNTEKIKTILIYSMTYPFKELEEFKEYLFED
PVX_123540	Pv	OG4_12090	-	+	GTP-binding protein, putative	gtp-binding protein	MKLKFSLLSAIFTFPLVQFCNSYMIKIVHHPVVINNLFSHHKVQKKKSLSPLGYSSHVPFLNEHNELRKKADRFKVFVKEGNIRNNCGGKNGRPTHKGRTDIDHQTGRQLRGAQKKCHDRETTLEDVTNQRGSAHRGEDEEGEKGHQKDVHFVSDMAHAGGTPSNGDSTEGDTGNGEGLGDDSTEVHAGWARDWERHMGEIAAEGKGAFRDKREDYASRVRSEENGGENEGENEGKNEGGNGGENEGENEGKNEGGNGGENEGETAQSHREEPPDLHGKPHHEPLHDPLHDRRGKKKGVDLKIIRSLPLISIIGRPNVGKSTIFNRLTRKFQEGSIVLGESSTRDKIYGEVDWDGYKFEVVDTGGLLFEDEKFCKQIRDQIMLALNESSVVLLVVDGIN…
PVX_123725	Pv	OG4_27833	-	+	hypothetical protein, conserved	conserved plasmodium protein	MPPVRALLKAATIAYALLKNGLCVFTNSRSGRSICPAHDTRRGTSRRPARHLKSVHLYSYAYAYAYPCGFTKKAFLPRHPKGNGGPSEEEPLRTYLLNGQRRYFEKKRHAKKRHEKRLHAESMFFNPKQFKNLFPEEGKKKGAGAYDDDCLNLEEVENLQEISPDLYKKLSDYNKEEALDQSKGESDQAEETFDGVDPKDISVYEGLPLLMIDGKDFQGFPDNRKVKISPEIATPFDNSEYDDFVESNRRKSDVCSGSGGNVRKGSQGEAAHKSATHLRNGVDAGEDVPDFERDVLSIIGEGEQSPPKSCDVGEQNPPKSCDAGEKKMTKEEKIERYKKVGRHYHMDSQLGEILYDRDYPGYIYLNHGEDIKELDEKSEFDSESPGYINPSNVFLRTGR…
PVX_123795	Pv	OG4_12828	-	+	DNA GyrAse a-subunit, putative	dna gyrase a subunit	MWFICPLFFALVADLLFPLRELSFFFVKSEKREKRFPIWTPPKSSAPLFIHSGCAGVRQGRSASARYGKGSGWRNGGGKDGGTSLGTSLRPSLLRAEGKPDGEAVPSIGEPTSIASNDRSEEPPARVAKTKGTPPAGANTTGISNHVGESIKRIKGEYYDVEICELLSKNFLSYANFLILNRCLCDYRDGLKTVQRRIIWSMYEINKGAEKRSYKKCARIVGEVIGKYHPHGDKSVYDALVRLAQRHHNSNVLINGYGNFGSVEYNAAAMRYTEAKISNFCYDVLLDEINEENVEYVRNFDGNEIEPKVFCSKVPLLLINGCSGIAVSILSNIPCHNLVDVINCTISFLLNPSIREDHLSAIIKGPDFTTGGIIISKPNELQNVYHTGRGSIEIRSNVF…
PVX_123920	Pv	OG4_10560	-	-	ubiquitin-activating enzyme e1, putative	ubiquitin-activating enzyme	MQQKNPPLKKQRTYESVNVEMEGKREAPEGCSVLGKKENEQIDADLYSRQLGTYGFELMNKLIKLNVLIVNVKSVGLECAKNLILSGPKSVCIYDNEVCQMPDVGVNFFINEEDVAKQVTRSDAVIKHLQELNSYVHIYNYKGELNEQFFQSFDVIVCCDVSHSLLVKYSKMVRSISPVKKIAFLCCNIYGLCGYLFVDFGKGFICYDKDGENTKVCSISKISKAPEGMVSFDFDKGAPFQKGDYVKFSNVEGMTQINHKIFKIKDMHKYTFTIGDTSHFDEYLKGGECTQVKSHLRMDFQPYEFVCATPLSWEAAGEGKAAGEATTGEVPTGSCSPVPDGETIYEDVPSPQSFLISDYAKWDMSNQLHYAIQALKKHEEANGNVLPENQEEEAFEKVF…
PVX_123925	Pv	OG4_45842	-	+	hypothetical protein, conserved	conserved plasmodium protein	MLKSNRRKLKFTVFSLILISLLAQMNQCMVTKCRLPHVISMSAKRGGEGEFSKLRSRGGKNDTSSPPQWEGQKGREKTKRVLTFMRSNYTVRRRVGRKNKWEKPPCEAPTRCSASEVMSSSASDINPGVSPNEEATITSSAEMMKHLTFHFEEECNEIMVRLGNFLQVSPHLLFKDVCVKLNKLFTNLYTYDNENVPFATTQHTLNVTDDVIKHNKFKIYCVLGLKVLRIFLIKYLRSLRLCIPVEVRKRYILDFLKIGYLSKVYESRYGLIEFPVFERLSQKLKAKLLYFYIALKPQDVSNVLIKIFKAANYKDENELLYRYVYTSRFTSRGGKRFHKILSKEYLQLYEKEKLVRRHRCEDDLLWVRFFSLLKLHNPEVVGEKKLLKQTYRLVFSKMG…
PY00025	Py	OG4_11589	-	+	FLJ00221 protein	zinc finger (c3hc4 ring finger)	MEINMRLYILLSHLTMASILIYAFLKYDEFYSIIIYLSTEKFPKTIIYNFSLMAFILFCKLFLNFFIGELRYLEVEQLMDNARIFIMDTILFLVLSKPTINGKEVSSIVLIKYLSIIVILKVYHLILYSRVSHIFELGIPRVRVLVKLFIFMVLLSVSNLFMFRYFYKNSFKNSTMYLWLFFETLSIFESCQISIMKFFINIIDIRSPNGLPNKSTILFFLDIVHDILSLIIFLVFIFVFILNNFSNLPLHMAADIIHVVKTLITKFKSFKRYRELTKNIETKFINATEDELREAGTCIICRDELKIGSKKLECSHIFHIECLKSWFIQQQTCPICRREIKPYPNKKEDQKKPEQNEELKQSTPPLTPQEIIMKENFLPNHHFKYLNNIENQDSNNTEN…
PY00033	Py	OG4_13657	-	+	DNA-directed RNA polymerase alpha chain	dna-directed rna polymerase alpha	MLLLLYLLFITTCNYLSYSLIPGNKRLSFLPIHSDHSRHNYTRNKNRHFRSYYKNEKRKGRNSGNRNIYNLIWLDSENKDDRETEWLNNKNSSNKDDMSNGSDIISDDNIENDITDNKNVSNNFHRFNALYEGDGDTEDDNITSEDSNITDENDDKLLDIEGLNNDDRKIIESENKVTDRHRYNVYDNEIIKKDSIEIDMDKADKIDREKSGLPPYVYESGNVFENEPMDYEPEVYDFNTYNKYFDELCKEKKPIIDSYQLDKDLLDDTYFDAKKGGPKTFGFKFKQIQPVKYHQGRSYTYFFMHSHEVELSPIFLNAFRRVAIKHLKGGRVTALRIPGMKHEYYCIVGVRENFFDLSQNLRQITFKNVPEDADMNNYIIGKFRIKGPMIVVAGHMQLP…
PY00088	Py	OG4_11112	+	-	hypothetical protein	zinc finger protein	MSSEKNATPPPSILCENNCGFYGNRANNNLCSKCYREFLEKQKKEMSNIEKIKDKSMSDTMHNYNKINDLIDPHYVKGKDKDEKNEVSDQKNSNINLEDKIYLYNNSNNRYNN
PY00113	Py	OG4_19114	+	-	hypothetical protein	hypothetical protein [Plasmodium berghei strain ANKA]	MNYDFSLQSCCDKNQNTTYITILCCALVNIICWKCKFLEPFKLLTVFLHEFSHASACWITGGKVKGIEVNRDHGGCTNTIGGDMFFILPAGYIGSCFYGMFFILMAYINKWTLLASAVFLCFLLLIVLTFYAKNFFLRFLCILFLGIIIGTWGIGVSFNESKYWPLKVIMTFMGVLNEMYSMVDIFDDLITRTTPESDAYKYAKLTKCNSKFCGVLWCVINLGFIILTMYLIGAIHVKPFEN
PY00133	Py	OG4_48412	+	-	hypothetical protein	hypothetical protein [Plasmodium berghei strain ANKA]	MSITIKESLEHVCNVLNYFGIEYITPEILRRGKNNKKVQRRKVIIKYTFLINDLCLLYFFDFKRKFKPTYNEYIKNEILKVEKLFIKNNKQAEDELNKREDDEYVHYNHSGGVTSSCDHDAISCDDEDYFFEELGEDVHYFDDFYLISPIVVLLLEYFEYPRLYQLIKCNFQMAKELLLCIGFMFDCFGLFEHYDKKQPFYETFFRKVCDGDSNSNMHNLNKMKGKNALSQKNIKKNNDNDNDSEDDEEYKFYHVINEAMLMLSNRPHELEIFGYKHFYNFLEKLKKEKKNKQTSKSNNDERMPRLGTTAYDDKKIKKKKHGDGDELVTCEKKNDYIRELSKEEKGIQGNNKNYENNRNTESNVKRNAIEVNEEEYINLNNTKKELQCNLSISEYAEYD…
PY00162	Py	OG4_30729	+	-	MIF4G domain, putative	hypothetical protein [Plasmodium yoelii yoelii 17XNL]	MKGKEIHNSPCTILSRKEKRKLERTQKKRNKLLFSNKKKKFKRNDNTNEEMPLKIHKNVNNHEKGKQMRDTKNDSIEKSSIKGNKKKRNSYSNDLSDAFQKKKAKKMNRSIRDLDEDQKKDEYLLSYLSKKLKINNNKHNEEKLFNELTKDGFDSNLLKLTDIIFDDFQKKRSNKKGNKKLKNRKEAKEEEEEDEEEEDENEEEEDEEEEEEDGEEEIDEDEEDEEEDEEEEEEEEDDEGEDEEEGEGEEDEVDEEEDEEEVDEEDDEEEDEEEVDEEDDEEEEEEXDDEGEDEEEDEEEVDEEDDEXEVDEEDEEDEEEEIDEYEVGEAKKTQTKGIAKKENYTKKRQVNYKEEEKKIEKFLMLSLNKTSEFNIKCIIEDICKYFHDIKDSNLKLTFV…
PY00251	Py	OG4_48420	-	+	hypothetical protein	hypothetical protein [Plasmodium yoelii yoelii 17XNL]	MKKSIDYINMFFINSINSLILLIFMSIFFFLLDGINTFEFINIQERITQMIWCSFFVLQIGLLKIAEVFANSPNKKQIIYINYMLIAYVFLAPLSSSLLFTSALSWIKSIYFIYSLGLITSIRIRELLFICLITFSAGFIRFYYSFSDYTVILCFITLLAVHLSIPIISHIVLFFLAKQIAYIKQKPLRAFDNIESYFHELEKRAILIRNNLIYCQQNNISVDILGNNLFEYEVNDGVKKIKTVNKIGLYSYESEYSLNKIQCETPFDVSDVNYSSFNSFNIEIEKDIFQNEDRSMNTKKNTRISNTGSSSIFMDKIINNEINVSRKKEYSAENDKIRAKGKKKTKSNEKKIDKKENKNWDHECAVDKTDDRKYSFLNKHGSEKSNESIGKNKKELNNI…
PY00263	Py	OG4_37676	-	+	hypothetical protein	hypothetical protein [Plasmodium berghei strain ANKA]	MNYLTLITIFVSIVLLYEHKIKCLYAKDEILKGNLKMLSGNINEKITLKCEQGEFIHILDASYGNPNIDNFLIKKNSLDAPHTLPVVQMLCEGKENCDMNVTNDTFRILSIIKDFHRLIIKYSCILSKPKQIPLYNIKATRGDNKIWNVEFQGEELNKNLYLHVNNINAICDTPLLKKNYVDIDEAKFECNNINNCVYIIFNNDGYTLCESSSYKNPIIQKYSKIYIKMSYSNTAKIVYNNFTQIYKTKNFDTIFYKYFTTVNGDIPDNYEIVPNIQGSRIKYILVIKIYNKIIL
PY00441	Py	OG4_23361	-	+	hypothetical protein	conserved plasmodium protein	MFSLYPHNLVYAGSCILASVCTLCICRNRELFPHISENKSIGYLYRLLNIHKYEAFNIIVQIHHINLKFGDDDNNKYILHLKVGTRYSYTNYYKNHLNKIHIEERKNLVIKQNNSTLTVEVYKKGTIKNTFIGSAEIHIYNDIIKNFFPSNIYFNVVNKNQIVATACLSFHYINLDSIKKEDQLYTSLFIETIISVQKYQNKNNEQLEKLISQGIEHFNAIKELDVSTTIYKNITSLPNEDKIRLFCKSLNGHLLHSNFYVKSFYNKYYFYLHFFKGKFYWCYYNEEADAKIDNNRVGYIRLECVKNVYSDVYSHRYFYIKYRKKNEKKENYLYLKTVDRDRNIWINIIHDFIILVNNYRKEKKMKKNKIKELTTNYVHGKSQEEIEINRKLSQSFSKN…
PY00454	Py	OG4_21677	+	+	MAC/Perforin domain, putative	membrane-attack complex perforin domain-containing protein	MKMRNIKKSLPVLFILLCIYQQSFINSLRISVRNNKNHRDGNNENKFNKNVELGTMEKPINILCNDISCNPGNNISFVNQKKKEIDSDDDLYDMLDDDASTSAGDDEDEDDYDDYTDDKNTEIKDEEQNEHIDKTDQKKDKKGTFSIKKQEEEINENKNRTEKFFKKYKFNDADNEGGDDESETDDENLDNSTQNSHAENKNPESVIDKHMSVFPGLYFVGIGYDILFGNPLGETDSLSDPGYRAQIYLLNWEFSNHGIANDLHTLQPINAWIRKENACSRVESINECSSVSEYTKNLSVDVSVSGSYMGFGSFSASTGYKKFINEISKRTSKTYFIKSNCIKYTIGLPPYVPWEQTTAYMNAVDILPREFTGLDEDSECTPDVYEQKKMTKECRNVQL…
PY00469	Py	OG4_25880	-	+	Eukaryotic aspartyl protease	eukaryotic aspartyl	MKSVYHHFAIIFFLKLFLCNCILAIPQKTLGKGLFSLGLNELKNNVDNNSLNILGELKNSKPFINKSFIQINEKKDNVLLLKLYKQNIASDKLSTYYGKIAIGDNSENIFNVLFDTGSTEFWVPFKTCKFTKNNIHNKYERTQSFKYKYDNKGLPSVLEINYLSGKLVGFDGYDTVYLGPGFAIPHTNIAFATSIDIPVLEKFKWDGIIGLGFENEDSQKRGIKPFLDHLKDEKILTDKNYKNMFGYYITNTGGYITLGGIDNRFKRSPDEKIIWSPVSTEMGFWTIDILGIRKEKQPYMNERKDEVIVKYEGFHDGSNRSIVDTGTFLIYAPKKTMENYLNDLTINSCEDKHKLPYIIFQIKSKEIESIKGLSVIELVLSPNDYVIEYIDEVNSTKEC…
PY00476	Py	OG4_10955	-	+	hypothetical protein	cop-coated vesicle membrane protein p24	MNFPKKLILSLLCIWGCFIHTVFSTHFTIRPLENDCFYFKVSKNNAIVGSYEIMEKYRSCSITIMSINDKKKDIVFKSENKQDSFNIKVDKSGAYSFCYDNKKNVELTMMFTIRVKENHDGDDIEIGTKDDVDKISGQAFDLYSQFLEVLDQQERMMEKADLYKQINDKINSQLVIWSEIEIILLIILTIIHIYYIKSFFEIKTIV
PY00539	Py	OG4_46501	-	+	hypothetical protein	hypothetical protein [Plasmodium yoelii yoelii 17XNL]	MVFRFNLFWVGIILWHIFFVYMYNCIKINNYNNKLANQKLMNISTNVESRGINKNNNDRNEIKNKKNIFGINNSNKCNIMISCYDKGGVFDQNFFLLIEEKNNIKFVKEEIENIYGIPIKFQEIIYENQKLDDNITIKNLIKGKNIKLLNFRLISILPHFFSETDDEIDKKDINMEKGNKKIKILKEKLKHYGCITLFNEYKKLLEKFKNNMIKKDIDVVEFFKSFDKEFEKLLNNNNISLEKIKKEIENLKYFDKKKLLLRLEIDYPHMDNLLLIRIKELIKFYYLGDIQSFLIFRVDKYIICILSANINVSII
PY00545	Py	OG4_34112	-	+	Ribosomal protein L10, putative	50s ribosomal protein l10	MFSAKVNVRYLIFSIFFLYFIYQVCFPECSEKNNKAKTFFFLIATKVIKKNDGKLGRKNIIKLFLEKPNFTHIGKTGNKKKKIYNKFLLKSRKCSGYRNTRDGKEETVRKMKRILKVTKLLIQLNSFKLTPNLRMELLINMPRPHIRMHMVKNTLMKLSVKNTPFEAITPYLTGSNAYFFIMNEDYISFSLYCNKMFSSIYKEYKTNNFIKMGVYENTILNKKETEDLINLKSYNVYFSHLANKINQIITSIPTSIMHIPSSIARGIYLHNKKKENM
PY00625	Py	OG4_10889	-	-	hypothetical protein	long chain polyunsaturated fatty acid elongation	MAFNILFLNNLGERILQYFNASLKPGRRVTKDWFMINPTHFFIVFFTYFIFIFIAYIYKSLYATHQNPDKLSKIKASSKSKNSRSYITLEKLVPIYNLIQVLLSALICVLTIYNARKRGFSLFYNYVDFSKTNIAFWCWLFYLNKIFDFVDTILIVIKQNWNQFSFLHVYHHISIFLIMWINTSVGYDGDVYYIIVSNSFVHFIMYTYYFFSSLKYKIPVYLKSSVTYIQMLQ
PY00626	Py	OG4_11207	+	-	unnamed protein product	dna repair protein	MTTLDKIGIQGIRSYCDEYPQQLEFSSPITIIYGNNGSGKSTIIECLKVNCTGDFPPNAEKGKSFIHDPLISNKMNVRGKIDLLLKNYNNKKIGISRSFSLYYSKDKQNRIKHTFRSLDNNIIIKKDKGDDIIITNKCVDINCHIPKLMGVSKALLENVILCHHDESLWPFSESTKIKKKFDELFGDDNFSKILEELVKCKKKMNEILKKKNYELINIKDSYEKKKNIFLEIEKNQAEIENEKIFIQQEKEELKKKTILLDQFKNKNNILYKISSDIDTYFVLYERHQSDIQQYKNMKEIYEESSSELEKFSDLFKTDLIKCNELIEKINDEIIKLEEESENCLNAYACGNLKECSEISDSIFCLEKKEKQLLDMIKNIYDLDICISNNFKCKCVRNIL…
PY00697	Py	OG4_27696	-	+	hypothetical protein	translocator of the inner chloroplast membrane	MYFLFLLFMFNVLVEGIKINNSFKGNGNILTGNNLILKKNLVGNKLCMIKNRMNIFFWKKKYHERPIDEKLSVIPVYIITNNNNSPYIFNEQDRQICYMFLCPNEAENMLNEIIKSNGMQNRNNIKLYNINMQKAYELIKEFMHLKKLESQNSDIKNNIVYWKLIPSKRQAQNALVFLSYKKKSELIFPVFYVDGFYVNKDRANIIPLFFDIEDLRDALNKKGVKSYKIKVLNFVDLIFSVCQ
PY00746	Py	OG4_41088	-	+	S1 RNA binding domain, putative	rna binding s1 domain protein	MIFTKQCLFLSFFVLIVSSFLKRKLVLNNYIYSKTNRFKKRKKIVNYQLVKSKDKDVESYIPHIYKDIAPSLKGLADQEYSYKQLLNAYIPETIEREKRDKLNKKSNQKNNKKQSKENRQTNKNNEIDEKEENEENECNKDLSNNIDKMMEIKMKENDIKHFENLSEISNHKKKNKILDIAYDVIEDTLKNTYMNQKLGLDNENNDSKKDYLEIAKKRKDLLYDKLINNYSMLNNSSTFDLFGVFYDNNNYKDDNKLIEELDKIMNLEPFKSNKDNIDEDIDALLKKDKIPTHIRNFILKYKNLRKINMSNKKIDHMKKNENEQVKESGSIKQMDNDGNVDDEKEKDEENRNYEKNIKDENGENIYNDFNRDLNKVLMTFNKNLTNEKLVKRDKYIIDE…
PY00787	Py	OG4_27886	-	+	hypothetical protein	conserved plasmodium protein	MNLTIKIINFFFYYLIIEPYLFSESLGSIKSSVVFATLATGNIPNGPVDLPSKKKLNLGLRKYRYNIPDENVDNVMQSEMNEDAKELMDDINKMKYPDQGSDNYYFKNEMYYEIPPWLQDIITLSNKSKKTLETLG
PY00819	Py	OG4_10672	-	+	pyruvate dehydrogenase E1 alpha subunit	pyruvate dehydrogenase e1 alpha subunit	MVFNILYFLFFTFLLTKRCMNLDLKTNKNKQIVVSFISGCNYNNLYNRENKKSLKIAKDDTKINSLKNDKYSEHVNIDEKYDKNDYINKLYENEFYDSTNYNVYIENNKLAEYISDVSINKNEICTLYEDMNLGRLFENLVAKLYYNKKINGFVHLYNGQEAISTGIIKNLRNSDFVVSTYRDHVHAISKNVPVKEILNELYGNYYGSTNQGKGGSMHIYNKKNNFIGGFGFIGEQIPISVGLAYSVLYKKEFIQDTSNKEYETCSEKQNTLMNHVNDVKENLTKHDENEHDKNENDLDVVVCFLGDGTSNIGQFFESLNLASTYNLPIIFVIENNNWAIGMESSRSSLGDLTNNYNKGKAFNITTYKVDGNDVLSIYKLAKKKINEIRKKKSGPILIE…
PY00944	Py	OG4_10812	-	+	dolichol phosphate mannose synthase	dolichyl-phosphate mannosyltransferase polypeptide catalytic subunit	MVLYTFFLFILTCLKINMSYGSMYSIILPTYNEKNNVPYIIYMIIDELSKKKINYEIILVDDNSEDLTADIYKKLQLTFPNEKLLLLQREKKSGIGSAYIDALKIISGDYVIIMDADLSHHPKYIYEFIKKQKETNCDIVSGSRYNKDGGIFGWGFKRILISRVANFLSQFLLFINLTDLTGSFRLYKTDVLKEIIQNIQGKGFSFQMEVIVRAHKKGKKIEEVGYIFYNRLFGESKLASNDIFQYLFCLLRLFWTL
PY00948	Py	OG4_11916	+	+	hypothetical protein	transmembrane protein 111	MDTLVLDERIRMHALIPIFIIVLLVCIIKSNLGQMPQPALKMDIEKMRQNNFLSRFTQLKTNSGFISPLAFLNRRYFYNKPQIGFFNEVPEQINPLDSFLKQDTSDLFGMMKNQIPFLILQLGLGFLINMFFSGYLVAKIPFPLTYKFKSTLQMGMDIELLDMKFVSSLSWYFLVMFCSSGLISIVDYFFLQGNYIK
PY01010	Py	OG4_11682	+	-	Drosophila melanogaster SD08430p	acetyl-coenzyme a	MTKSSHGNTNTNLMKERRPKQKTDDEKDYSKEKISKNNTDFYNVIFLLLLYTIQGVPIGVSSVVPLIIQDKVSYSQLSMLSLISIPFSLKLLWAPIIDAIYIKRFGRRKSWIIPLQLICSLLMIFYSLRVSTWLGERNGSINLYSLTSFFFVLFFLMATQDIAVDGWALTMLSEKNKGLASICNILGQNIGYCASQLSFLTLNNKKICFYLLKKYAKIMHLIFYKSEYYKMLNTNLDLIYPTFQPFVDMNVFLKFWGIFILLLTILTFFKKETSNNKEKENKKITEQEKEQNNKSQNISNVPKKEENEFRNAKETYKNLYELLFLPPMKIFIILFLINRLPFASVEVATNFKMLKKGITKEEFAIFNPFFIPISIISPAIIGKIIQNTNPLNVYYYGYI…
PY01049	Py	OG4_42868	+	-	hypothetical protein	hypothetical protein [Plasmodium yoelii yoelii 17XNL]	MDFTIFKNDKNLSLNGINKIVGDVYKDNLDYLMRKNKSELERRETDKFSYEIELFLNSLDSEETRLYEEKDKIKESFQTIALQLKNVKRSIIKTEEYVENKVKGVMLKNSQKIFEVFKKDINNL
PY01143	Py	OG4_48377	-	+	GAF domain protein	gaf domain protein	MIKIFKKAVYYFILNFICTCFKVHKINTSNNIDLFPFPPKQFVNITHKARSNIYNSCNNNDAAANQNFKSISQTCDQNDESESEIRKKIEEERKRQEQIKRENSLFINSDFKYLSNSIPINVEKKYAYDAFKYTNEILAYIFFVINLFKHEQFKNKIYKEFLEHQETQIVTNNSYSEDNQLFNKNDTLSERNKKLVKNFLRKFGDKFKFFNTYEKVQREDWATMFKMEQDDKNNFFKSVKIKNETTKEYYFVIYYCNWKYDCMALYNALHNIFKNSYNDVNFYKISNNICENDEYTDYDGEQNEKGKNKNEELLSKSIIDQIKDMYIKDIKNNQVMDIDSVLNNDHAENISEMQTNEDQTSKNNKNNKNDQNNAQTAESKNNIEGDNTKKTFQEIMAEE…
PY01198	Py	OG4_10719	-	+	glycyl-tRNA synthetase	conserved plasmodium protein	MNLTIKIINFFFYYLIIEPYLFSESLGSIKSSVVFATLATGNIPNGPVDLPSKKKLNLGLRKYRYNIPDENVDNVMQSEMNEDAKELMDDINKMKYPDQGSDNYYFKNEMYYEIPPWLQDIITLSNKSKKTLETLG
PY01214	Py	OG4_11154	-	+	Glucose inhibited division protein A	glucose inhibited division protein a	MVEEMRIHFSYNSPKKKIFFFYVLLFIIFFVIPNYSYILEKKSLFLTPHLYRKTYKNFKKNGNKLDSNQKLFIGKCSCNEHEKKYDVIVIGGGHSGCEASYISAKLGAKTLLITQCKESIGEMSCNPSIGGIGKGILVKEIDALGGLMGKVIDKSGIHFKILNLKKGLAVRGHRAQADRDLYNYYMKEYMFNMPNLYILENTVHSLLIENSMTRNDSTNMDENMEEKKKCKYVYGIKNKCSCEFYADNVILTTGTFLGGICHIGKDKYKGGRIKRILGKGKDNQLKDASSIEPSKIKEEMNKNKMQKINYIHNYIENNKNGVEQNSIFDNLIEESTKNLATQLKENNFEIKRMKTGTPPRLCKNSINFDILEKEGTEKKHPFYFSFLNSNKINNNKTLP…
PY01243	Py	OG4_13660	-	+	LytB protein, putative	4-hydroxy-3-methylbut-2-enyl diphosphate reductase	MYDSILIFLKQINIIRSLFLNCLVIYFIYLFFFTLVKGKKIEYDSFHNPMYGMLNVRSNFSIPTIIKWKNIKKYGFIHKTENYNYQKNNKFNIFKRPNNYTINYKLKVNLFKIKNNKDIYFLSVNGNINQKLNDTNCGGGCNMCSSQVSKQNGAKANDNTNYSDTNGAKANGDTNGAKANGDTNGAKANGDTNDSDTSGDSTSGDKILYLVNPRGFCKGVSRAIETVEECLKTFKTNIYVKHKIVHNDIVCKDLENKGAIFIEDLNEVPDGSILIYSAHGISPQIKELAKKKKLIEIDATCPLVNKVHVYVKMKAKEGYKIILIGYKNHVEVIGTYNEAPDCTYIVENVEQVNNLNFTENQKLFCVTQTTLSVDDCALILNKLKEKYPNIETIPSGSIC…
PY01337	Py	OG4_10442	-	-	Coronin	coronin	MYLFIFFSTNFKYFLTQNADPWNTAFDDLQICTKITESCGIACSSEYIATPWQVQGGGVIGVIKLENMCRNPPVYKLKGHTSTILDIQFNPCYSEVIASSSEDMSIRIWEVCNKEDISEEIKNSLCVLKGHKKKVTIIDWNPLNYYILSSSGFDSNVNIWDIENEKKAFNINMPQKLTSLKWNSIGTLLSATCLNKKLHIIDPRQEKICTTFNGHSGGKCAKNIWIDGYSGNENYILSTGFSKNYMREMKLWDLKNISEPIYTISIDNASAPLLPHYDESIGIIYIIGKGDGNCRYYQHSEGVLRKINEYKSCLPFKSFGFIPKQACNIYKCEIGRIYKNENDKNIKPISFYVPRKNPNIFQKDLYPPIIMHDPNYSSKSWINGNNLEIKRININELTD…
PY01360	Py	OG4_47305	-	-	hypothetical protein	conserved plasmodium protein	MSVLPLFHICSSFQLNNCLDPKNIYENFVCSVCLDLCDTPVTTSCNHICCYKCMYYSLLHRRICPICKKIIKYDELKKISGKLKKEYEQLRIKCSLCNEEIRIKNQKKHFGVCKYKKCKNYILGCEYFDEKDKIEMHEEECEHRLINCSSCSNLFHYKNIVFVLSLKEKYELNIRNPYTYYSYYYNLLLNTNFNFFNYNYCINKNIHSNNYISRKIQIFKKLQYNLDHHLFSVNNKNNISLPINRNIPLNVCNHDIYDRTNNNNHTNNYDNNTGEHKIVGVENNINANNNSSNLHQGESNIPNTKFTSNRNTHTSVNNNANNFSLTTFLRNHADLESNIANGIGEANIEIVTNFGDSIGIRGFTDINCFNDDHHNYIDNTNFIRDYSDVERIGEKIYLC…
PY01445	Py	OG4_84687	-	+	hypothetical protein	hypothetical protein [Plasmodium berghei strain ANKA]	MYFPKYSYTLCIILILSLLFTIASSYNNEGNKNFNETENAAKAIRKLLNGEIDTIKLENGDELKIKSSNNIQEDYSWKNNNRQL
PY01446	Py	OG4_10135	-	-	hydrolase, TatD family	-like deoxyribonuclease	MKLIFYSIKCVIILWYISEIFIKANVIKIFKNIRYFISVKNNKTFKIKKKINLHNTKTIKMSEMEHSFIDIGSNLADKMFDGIYNKKKHENDLKYVLNRAKYNNVEKIIITCTCIEDIDKSLNICETYDPKGEFLFLTAGVHPTSSYEFVDKNKIEEHNMIAKNEFEDFLKYFKNESNKEQQEINNLECDIKNQDLKVDKNTLNGDLYIPGFVYNEQDQNYLDKLKEKIEKHSNRIVCIGEMGLDFDRLHFCPKYIQIKYFIYQLKLVQMFKLPIFLHMRNCSDTFFEILEKYKPLIEQVGGVIHSFTDKEEIIQKITNYKNLYIGINGCSLKTVENINAVKKIPMDLLLLETDAPWCGIKKTHASYHYIKDKYEKRNYTNLKKIKNILQCDDTIIFKD…
PY01464	Py	OG4_48315	-	+	hypothetical protein	hypothetical protein [Plasmodium berghei strain ANKA]	MNNVLFLYLSLFSYFCVASLCYQMIYVNFFDENKKNDLENISCYWQYFCHGNFHFCQYGCSLKKKLKKGYNLLNTNSLQENCFINIECDDYDIYFDSEDPAYIFFFSNTYFRITSDSTLYVNLYKGNQNKRNGPNKQTGKTQSSVKKDDYHKWNTKKKKKYTNVKIINKLKNFVSQRFKKELIKLLIFFIIIYLIFLLLFIYTYLQRKRCE
PY01494	Py	OG4_11876	-	+	hypothetical protein	mitochondrial carrier	MEHLKNLITGALAGVVVDAILYPIDNIKTNIQAKNQLYSIFEAKKLYNGIIPTLIGTIPASAFFYCFYEMSKKYISENNPNISKSALYIASTSIAELTACIVRLPFEIIKQKMQVSSEASVKNIINGVLKMQGAQSFLLRSYLVIIIREIPFDCIQYFIWETLKEKGQKYFREFYEKHPVIMSSLSGGIAGATAGFLTTPIDVIKSKHIIY
PY01516	Py	OG4_38873	-	+	hypothetical protein	conserved plasmodium protein	MEGQRSLKKVNVYKRLPYLYIGMFFIGGLLEVVFCSTNFYQIYNIGESEKKSDEDISDLMKRYQLRQKIKESKKKKKQYSCTISHIDICTMFFIYVKTIYFMDL
PY01533	Py	OG4_10845	-	+	DNA ligase 1	dna ligase 1	MKLLLLILLTKMFFCKIKRYMRTEYNYVTPFMKSKLFHNYKNKFNVIVLKNIRNNVPNRNDKYLKCLSFPKKMDGDEQCDTKIEESHVKSEEKEASKRKNTNDDGAKTKKSKVKNENEIKKGSLFNCKVYEDEKISDLSSPKFNPANFDISNLCLSEKDKIKHKFKDSLLFTFLTNTFNQIEELKGSGAGSKKNVAIILSNVFRVLIYYSPNDLIPAVYITLNKVAPDYQNVEAGVGEALILKTMSEAYSRTEASIKKDLQQIEDLGIIAESCSCKMRTIFPLPRLTIQSVFNELKSIPNISGSNSQQKKREVIKKLLVSAKTSEAKYIVRFLQQRLRIGVNSATVLQALAYAFVLTRPEIPENIIKDGKMMNEKLLNERIVVKGDKDNCDDDATEVKN…
PY01540	Py	OG4_54951	-	-	hypothetical protein	hypothetical protein [Plasmodium chabaudi chabaudi]	MEIKNKLNTWSNVDHMYKRVKKKKCKKNIFYLIFLISISLLGYFQSPNFVVFAKINDKKKNVKLDNAPTDTPNSESINKENNKLDNETNSIKENNFDSKINENVYNTNNKIRNELLFQSFNIRSFEEERYKLKFVEKYI
PY01585	Py	OG4_30669	-	+	hypothetical protein	conserved Plasmodium protein, unknown function [Plasmodium falciparum 3D7]	MKKGMQVYVLIYLIIFLEGYFSLSLFSTSVFHKEFTKTVERHLREDYGDKDVAVFREIIRNYKNNDVFLNPSDEENLKISMRKYAGDRFIQEYDNLMAENSNDSQKVLAKSMINLIKQQFIKLKEIETQYVTPNFEAYKEITKLKPLAQELDADTPCNTEAECKKLENMMNICTYVRSGADFAYDIFLVTTHVVTVMMAVLCACIFIGPVHVCALKNFP
PY01589	Py	OG4_10903	+	-	hypothetical protein	vacuolar atp synthase subunit	MAQSKGSNVLIQQLLKAEEEADLVIKKAKDVRAKMLKEAEATATEELKIFRAKEKERLTKGHKEKSTAEDEIVTKIEQNTKDEIKRYKDLFKKNKDQVAQFVYDKVFKVDIDIPDCVQKYM
PY01631	Py	OG4_41949	-	+	hypothetical protein	protein with 5 -3 exonuclease domain	MRFIXFMTKLLILNTVVLIFNRYIQNEKYEFSFFIYCFTKKNIQRNGFDGNSPQTNKKGSFESVKENPKIICLGNDNINNYVENGISSNNNECTFESDKKMQENRNPELHNINNNNNPYSYTQINSKSFNINNEYTNKEKGDKNKTEKIPIIYTSIDRIKRFSHIKGKLKLVYIRSFYDGNKKELYEGKFQFYKNNIIYVTTFAVVKNSLKYNFDKTDKWFSAYMNILQKNNYNITVRCKGIEKYYGSISFSNYELELFENLRKLLKSKLNITYDHLLYNLNNFYSAKRKFLEFINFRLIHPGFQFIVKTKNIYHDIESYNKNKEIFKKFNLSYDSISTSXRILIQKNFTKTAEDIFLLYVLLRDKLIESDESDEVIIFKTDDNNIFTYDKKYSEEIKI…
PY01697	Py	OG4_54958	-	-	hypothetical protein	hypothetical protein, conserved in Plasmodium species [Plasmodium knowlesi strain H]	MSHLEFLHKFVISHSNNFLQSFYAVVESSQIECLECPIEKTGIDNFLIKIYIDNIIHNIRTLLLTCLSGSIGNTLHNTEIEQNDEYIYVTCSESKNEDSIDYNSEDNNTIKNNNNVYTKNLYFLNKCKSIHNLRKSLENAKIKTNKHAHMENNILSYCI
PY01737	Py	OG4_13744	-	+	ribosomal protein L35, putative	ribosomal protein l35	MKFWFYNIIFLVFMLKFSKCLAWFNDKNKSKLCLTTLYKNNILIKKKKKKXXLNIFPHSSLQLKKYEFVHKDMYVNSKNMLNKNKLLKNISFLNFKKCTYKNWDTNFFVLFVRGCTNVKPKTNKSIAKRFKITKNGKLIRKKCGGSHMLRKRTSANRTSLRKKTVIASNKIVKKYKSVIFK
PY01750	Py	OG4_10678	+	-	60S ribosomal protein L27 homolog	60s ribosomal protein	MGKLLKPGKVVIMLNGRRAGKKAIIINTYEGQTRERPYSYCLVAGIEKHPLKVTKKMSKGKIIKRSKVKAFVKYINVNHILPTRYQVANDFDIKNLASEDLLRSKNKKKEIKKLGRVFRDKFLDPINKKTGEVSKDVSFLHKKLYF
PY01808	Py	OG4_42709	-	+	hypothetical protein	rhoptry neck protein	MKNHWFYIIYFYLFLNVFSRCNGIPNKSIQSLPYDQNENRIGVTFNNKVIQGKHKIKINDGSNNEGYGFLSLKTVSIFNRYYIMKLANGLFNRSMFSKDHFYRNVALYESLSRTNYFLYPIVLNDKNLKKIMSLMNAAHSSKKKYETFKKRLISTFNYPNFELDDVVKNEMDQALLIYNKTRNDSYWSVVDALKSDGILLAKTFISASFAHSVSGIVGLANHELLNICFSNAYFLNHIAPLDKFVMKNTFGSIISYVFKSYLTFFYPLIVPFRGAFSFILSSICLMQFGKIVHMIYKNLKKLYRISRRKFYYAILKVNLLRQPQIHVYAMKLLYGDALVLVSKIWKLSYVNVTDHLKGDEMSPILNNLFEKNLGTGFFDFSESLFKYVVKSLNEMNILT…
PY01813	Py	OG4_42495	-	+	hypothetical protein	hypothetical protein [Plasmodium yoelii yoelii 17XNL]	MLKEKLLKLLNYYYFLKNYYIYHILFVYTFFLRITYTYAEITISHFFTFLLNKYDNIDTNDNDGNLFYYFTHFFNFNNKSDDKFLNTKLFVVVYLPICLKCFYTLFFDYISYYIYMYYYFDKINDFKKVYYSSIPYELSKLHQNECIYVDRDKNGKGNRRESKKLKKNPITPKKKIRAYIISKRKKISQNDFLNKLNDIPFERYKIYLLKKKINDLLSGKRKSVLTIGRHNTNEMMKPLSGREYEKEQKRCMKIKIEKCDDKHIRGVLNGNSNTRGIVKKNVFYNLKKKKQKKYNNSNGEDLLKNSQFKKKHKISILEKVYMKMKKYYNGERTGGEYVSLTNEGDNDSINHSNNKNEYSDNSFAPKYKNYIYKENVHNYRGKNNFLNFRLDRKKKASKN…
PY01850	Py	OG4_24016	-	+	chaperonin, 10 kDa	10 kda	MKTIKIAGFVLTFLSTLLAKRLAVSNSLNFVNNAPKQLQKRSPQKLRATEYKLDNRTIRGPLSPINEYILIQKNDAHDTTEAGVFIGDTLKKNQYVGKVLAVGTGIVNPKNGQRVPIDVEIGDLVIFNPSDGNKLKYNDKDCLLISNEEILGKINDSSMEVNPENITPFYDRVLIKLVNQNINSDSLIIMPESQNNEKSCDGLVVATGSGNYDEHNNKIPLDIRINDYIKFSPFSNESCEFTYKNEKYTFVKARYIMAKY
PY01870	Py	OG4_11252	+	-	ATP-dependent RNA Helicase	atp-dependent rna	MSYKTNCVASNANTNALNNSNNLNKIEDNVIFDEAWKKKILEPLKDPRYKTEDVTKTKGNEFEDYFLKRELLMGIFEKGYEKPSPIQEESIPVALAGKNILARAKNGTGKTAAFAIPLLEKCNTHKNFIQGKTIQKISLILVPTRELALQTSAMIKELGKHMKIQCMVTTGGTSLREDIMRLYNAVHILCGTPGRILDLANKDVANLSGCHIMVMDEADKLLSPEFQPIVEELMKFLPKEKQILMYSATFPVTVKEFRQIYLSDAHEINLMDELTLKGITQYYAFVKERQKVHCLNTLFAKLQINQAIIFCNSITRVELLAKKITELGYSSFYIHARMSQTHRNRVFHDFRNGACRCLVSSDLFTRGIDIQSVNVVINFDFPKNSETYLHRIGRSGRYG…
PY01879	Py	OG4_10560	+	-	Uba1 gene product-related	ubiquitin-activating enzyme	MQSNNPLKKQRTYEDIDLKDIEKKRNDESSIRLENMEEYKIDANLYSRQLGTYGFELMNKLIKMNVLIINVKGVGLECAKNLILSGPKSVCIYDNEICEMSDVGVNFYITENHVENKICRSNAVLSNLKELNNYVHVYNYTGNLNNVKFIEQFDVVVCCDAKDSDIIKYNNLVRSIENKNIAFLSCNIYGLCGYIFNDFGNNFICYDKDGENVKSCNISKIVKDVEGIVSFDFDKSLPFQNGDYVKFTNVEGMNEINGKIYQIKNLKKYSFTIGDTSKFGDYIKGGECTQIKTNLKLNFKPYEYIKNKPLFSLSDNNSDQLNNINIVANQKGEQIIFEETKFPTSFIISDYSKLESSNYLHYAIQGLKWYETEYNCLPENYQNDEFEKIYKKACDLNNK…
PY01888	Py	OG4_27850	-	+	hypothetical protein	hypothetical protein [Plasmodium yoelii yoelii 17XNL]	MKSSIKISYILFVSCLLIRNGICQSFLPVSYATHKLYSFDKVSPNDIKSNVHNIVSNFITSNLKVIKNKIEGYNSYYNKNNDEYDNLIQNEYDASLEDEVKSLLKQSKNKRKLAKKIKESYNRALNNLKNRKDKTNDNYQDDDEITKNMLEHNLEQINSLNKKSDYLENKAMELKKYINKNQLNNYEDYKKCNISKTGKLKFVSSSNGLKHSIDNVQGIVNHNGFSIFYKKKKKMTYLLNIIELPIKIIGNVEQCFSFVYKNVDQIFCTNNKLKTLSWVNSLTEASFCANFKIKGILINLDNVDNESYKNIKKDNLLRINIKPDEKGTQVFVNGKKENAKENGVINLNKIKKQAEDEEKISKKEILKEDDESEQNEESEDNDDDNL
PY01960	Py	OG4_34486	-	+	hypothetical protein	hypothetical protein [Plasmodium berghei strain ANKA]	MDLFFLYIITFFELLYLLSGITSCINWGSEDKKGYQNKILFIRNYKERYKRCNKNNNLQKYYIQQKVSKINSKLVSSFESPIVGINLGNILKNKNKNKYLFFSQNNILNLSGSKSELKISFKLQKELILRRNKNLINILLCLHYVPTISNEYLKKSLNNFHLSDLNIKENILYHLTLKCLYGFEKNKNILETIHKNNYKFILQHSKILKKITKHVQISEEKNCLQSSKRFDKLKNNLIRTHRNNSWVENKVIDVYLKIRKKINIIFINTKKKKYIFQTYKKIIGNIKYYDVYDKLIILNYLYKNKKYRECFLFFKKYIYNSIFEHNTQQKSKYFIINFINILNHNNILNIYLMRIHNSYNFLLRSILLSKIQDKHKLNFLQINVDNFIQKNLKDTLYLG…
PY01970	Py	OG4_14424	-	+	hypothetical protein	dnaj homolog subfamily c member 25-like	MKIYFPMISLLFFILTSNVNCLFKNVVSRFYCNEDNCYSILGISERASIEDIRSSYFRQLKNLKENYDIKKKKKIVQAYNVLINKRSRKYYDYYLKNPDSIINIVNLNLLFLFKLFKVILSIILIALFGILIQYXNNKXEQKNILHKFSKHKDFRKKVQERIMLKYXQYKTYEIKEKQKIEKSIEIEIAQELYNQQNKYNNQNQGKVNIFKIIIIIKQIICFITWIIKWVIKYYILNCEYDESDKIFITRRCLNMSLDKWDALDDDNKKMLLKKELWVKEKKKEFLAEIKERERLEKISSAKYKKEKRMKKKGFSFNYND
PY02004	Py	OG4_30690	-	+	Eukaryotic aspartyl protease	eukaryotic aspartyl	MNKFFVFPLLLILNSIVLVKSLTENLRVSRYSKPGISTIILKGGYINRQFIGEISIGNPPQSFKVLFDTGSTNLWIPSKNCYAKACYNKKKYDYNISKNYRISSQKNPVNIFFGTGKVQIAYATDDIHLGSIKNQEFGIANYMSDDPFSDMQFDGLFGLGISEDIKRKGLIYDNIPRNSSRKNVFSIYYPKSVDDNGAITFGGYDKKYIEPNSNIDWFVVSSKKYWTIKMTGIKINGLFLEICSGNIEGYCDAVIDTGTSSIAGPKNGNLILLTKLLNPVKSCQNKTLLKNFSFVFLDENGVEKEYELTSNDYIVNSFKVDPILKTPCNFAFMPINISSPNGYLYILGQVFLQKYYAIFEKDNMRI
PY02032	Py	OG4_45974	-	-	hypothetical protein	protein swap	MKVFNNEPPPEILNGFNNNETSLSYYNNLNENERQPIFSSYISSTEKLKYLPKTLREHIIIEYTATFAILESDIVEFYLKLDNDLLIKFPFLHVDHPLHEYYEYVKANTKKRIIDIYPNIISEPLRDLLLYVQKLEKEKMIKNETKTKMLEEKQANALKEAKDKTRKLKQKGDQSYSSLFLKYMESDDETFEKEDIKTS
PY02034	Py	OG4_84537	-	+	hypothetical protein	pb-fam-1 protein	MNKIYMKTVFSLLGSFLYVNNKVIASDPFLRRSSSDNLISTFANGVSEDIYEQNTDVMCTDTEEAKKAEEIMKEAVTLLQQHAQSEEDYNLYHKYDEEATVYFKKHEDTDIGKLELKIRNPDHYNDIVKILWDPNGAKHFDGNFINGKLVRVYNPNLVIVQLRSRSLVGLAQEYLYALAYKVEVSENETIIVHASADIYDHNDTYEYSYRNTILESANSFQTEIDPEDDIVNGEIIKTYINLSGCIIKKEDEYVNLTCVNSIDVESPNMEDLILKVVKSIKMATISNLKNTFENN
PY02058	Py	OG4_84517	-	+	hypothetical protein	pb-fam-3 protein	MKKSNIFNKILLFAIIIYSLKCHQNELHNLSEICIYPQRDSINFRNGRILAYADKPTDLNYFYESALSLNDKTEDDYNDEGKLNLQENGELYTNDLKNNKLENLKITISETNNLANDNMDDVSETMGCGDGVSETMRYGDDESETMGYGDDESETMGYGDDESETMGCGDDEKKRKLESQKIAGNEILKMLGDNMNNKNAEYILLSKYLESFKLFLDDSFITDIDYDKIEKEYNILFRNWEHNKSLRKHINKSILKIVIKVILWNSAIALLSAYMSFVFLAFFSVSLIDFRIQYNQLRKLYKIRKMMKRYSRQFNSFVS
PY02063	Py	OG4_48259	+	+	Papain family cysteine protease, putative	papain-like cysteine prorease	MKTYKIKYFLLISFFINLIKQAKSKIIISCFGKQHCKICHIIIRNCFLSGTSNLEKCIACEENYYETRKCIKQEESFFSYQGNNALLELRDQMFILLFIYFLGGYFIQSLQDSVSEESMNELISNILDVAISRYENQKTDVNSMDDDYKSKIANLCLYLNFKDNYESAEKHKQTDVEHIEPHIQHIVKTFIHTNDNIEHMKNALKNPALCFQNPSEWVQDRLGYKENNEIPSVGIIPEKKLFKPFKNKSLMSSLYNANSKCNRTHCNRFADPNECEYNIRPLNQGTCGNCWAFASSTTVSAFRCRKGLGFAEPSIKYVTLCKNKYLVDDDSHIFGHYNDNVCHEGGHLSSYIEILDASKMLPTSFDVPYNDPIKGGECPAEASTWGNIWDGVSSLSKIL…
PY02078	Py	OG4_48350	-	+	hypothetical protein	conserved plasmodium protein	MKKCVLLKYATLFYFLIFPILIYVGSEENDQSKIDSLNENSRLAFFLLIQLQVPYLLEKFTQSVKYEKVIDAIIYLYNEELAKPDVVKKQNGYSIQDIKNVIQGLQNIQADIKDGDTKYFNWMNLIYKECWNEENYCHMLTSKKCSLAVFKTLPLNKLPITCISCMIYAINYGLYSEYLFKIFSNIVVCNKIDNLKLLNLSNDISLIREYRIYLNFLNKDELLKNIQSEIIVLNIKNASRLINLLTSNMEENNKINVTFRNIINESMSEIIKKGINRYIKYLNNNHLYTINESNDINIELEKAVTATINGYLYLDKKSNKLLHVQDFGLFFPKYYFKKCINLLTSHNLFIQIEFGINHVHNFAQIKNLFNFIELELMLNSYFHLGNGYYSSTSIILKKF…
PY02097	Py	OG4_34289	-	-	hypothetical protein	hypothetical protein [Plasmodium yoelii yoelii 17XNL]	MKYCIFVFFIMLSINIREYKNYNLNIKIKPFTNKIYMSSRVQLKSTKLQHRKRPRKKKKSEIYRTPVLYHPNQKDYFNLQSEYICLPDVEILNLLSKNKLHELINAIKNKDNNQINNILYKDINNIYIDPRYIYYHPSFVNNDDPNQLLSREKNSILKDTNFDKNYVIDAENEKNNQFVDVNNIYFYFKKVNITNINKDNINDDIYKELKELKKISMEKGDPIGYNIYKYFLNLITNVDRFKYIDNFFLVDYINNIWASKNVHKYFYFLNSLYDRMKKISYKLFNLNYKIDQIDHNDEKNKMVYFERHELFNKVIKKTKFIPNYILKHNYIYSNNILNLYQYDITSNSFVNKFESTYTPVLLTDFLDPEKKKNLNIYYNLNAFDSYKTYSHTYPRNNQL…
PY02099	Py	OG4_12295	+	-	Unknown, putative	nli interacting factor-like phosphatase family protein	MIKIIRLKNNENKFVRSLYKWPLVRYQNLYCSENKNVKNFGKIIKIGNGEDMITKMYNFENVRKHNIISVRKRNIISVRCFSTNLGNVNKNVQNNVKNVENVENEANECEQTVLGKNEKRQKTTREIYMDRKQRESIIKMYLFLSLILMPFGYMYMYCIEKNINTKDLIQIIKKKCEHLESQYNEIIQEFIDKYFPVNNEPLLPDFKDLNYPENLPTLVIDLNYVIAKLEYNRKTGWRVLKRPYSDLFFKELSSFYEIVIWSDDNFPVAQEVISKWGIPAIGCLHRDQCSKKKKYYIKDLNRLGRNLDRVVIIDHDIHAFMLQPENGILIKEFHGDVDDNEMLCLIDLLKSFAISSHSIGQFLQKYGGGDYNIGKRYLQQKNDAEQKSQRIRSLGKIFH…
PY02101	Py	OG4_54909	-	+	hypothetical protein	hypothetical protein [Plasmodium yoelii yoelii 17XNL]	MIILIFLIFFLEILCKGYVINIIKGRDHNFYIPIKNYVEKKQKIIIKPHVFRNYMKRLRNATVEIDIENRKDLTKIEIIKMFLKGVRECKNVEILKEKAKGHVPPTTKRKLMKQKRMVNLRNHIKNDRIKKQEYVNPNQNILNFPKNQIKNINAALLYFKHYFGKYENNPN
PY02151	Py	OG4_10290	-	-	Stt3 protein-related	oligosacharyl transferase stt3 subunit	MNEIYRNGPVVGSIEVTPNFYNYVDGVYYDKGFPHAKKCTMMKNNKRINHIFEVLILLLIVVLSFIIRLFSVIRNESIIHEYDPYFNYKLSNYLKENGFYSFWNYFDDMSWFPLGRATGQTLFPGLMITTYLIHKICYSMGFLIDIKIICIYIGPIFSVFTCILTYYLTKEIYNKKGCSSSGAALIAALFVSVSPSHISRTVAGSYDNESISIFLLILCVYNWIKCLKEGTLFSVVLCSLSTYCMGLSWGAYIFIINSISLFMLAIIILKKYNIKHCIIYNVYYILTTILFLNIPCINKSIFTSIEHLAMHGIYLISNLLLFCNLITNIFNLDQEKIKNIFIKICFIICFLIFKFLIFTDKLSWNHRSRTLLDPTYASKHNPIVASISEHQPTTWGSYY…
PY02160	Py	OG4_29284	-	+	DHHC zinc finger domain, putative	conserved plasmodium membrane protein	MNNYFSFIIVTSLSVFLYICYLYCLQNDHLNNYSKFLRIFLALISAPLFVLYYWAFVKCSACNPGYVDDIWEINAEENNIQIENRKIRNYTPNKYTICDKCNYLVRPERAHHCRTCQRCVLKMDHHCPWIGTCVGEKNLKFFFLFLIYGLFISLFVNITIMPQFVKSIYETDEAKESYKMHHAAIFISVSATTTLAWFFGTYILYRITSQPLSLLMLIRYVET
PY02187	Py	OG4_37693	-	+	hypothetical protein	hypothetical protein [Plasmodium berghei strain ANKA]	MRWALNIFKLILIIFIEIPKYYEKFPFVLCNISYMNNNKTNGYNKMNKNVFTFLNVINNNYYKNVSKLYMTKKFKYKYKNSLEKRIRKGRIRNEINQKLKKKNSAYMVITEKLSKLDPDQVYFKYDKNILKEYENIKDIYKNRKLGRKFNQFDYWYSSNKKEAKYNYSRHVNFTITENNFNFKNVFSYFHILEVVHERFKNNAFYINGLQSFINKYYDPVTGKRIKSYDKIKEKIEMMKSNDNGNENDSKLKKSENIVSSKGDMSMNTIKKDSETNNEEKQRNDGIKSKKDIFEMIKENLNDFQCENTVNEDSSFKLFGSSTSCLLKKNGPIAYDIKNPFMKSKLSSKRRRYKERKLFDIINFKCKNRQERLMQTAVRKLAKRKLKNENYILDGMTPA
PY02214	Py	OG4_48413	-	+	hypothetical protein	hypothetical protein [Plasmodium berghei strain ANKA]	MKLLVSFLYFIILQISSQFILKNHPNSKIRSVHYRYNASKGKRCVRLVKVNVYRGVLTNVIRPLKNKQFQKYCLFRALTRVCVSLSSRFSLNARISLFRKNINNLVLTKLLINNEILIKILKIGWLCKLSGIVNKNFKLCRYLSTIFYIISIYIDIFSTFNMSSNSYIYYILNALSSIMKNLSILTYTSIRSLTNLYISQMLSNKNWNEIKKTNQEIFNLNNVQDSKNCSNWNSISIDNETESFNKKEKNNETETVTDSFIKKEKQIANINTQIKDNLYNLENKQIYTIGDVSVITELCSSIIDLLTVIFLSKATHFIKHNLYFYIVLSSCHLFFSYKELQYLLASNNELNK
PY02254	Py	OG4_10489	-	+	multispanning membrane protein, putative-related	endomembrane protein	MLYRFLWIFFFFFLSTFFVKNVNSYLPGMSPTAYKEGDKVVINIKNLYSRRGITSLNYFSFHLCSSKDNNKKEERAPNIFKIISGDILYNSFIETNFKQNKTCANYCEILINDDTYNKYKYLILYNYNIIYTTDNVDIFREDPKRKGLYYSGIPIGFIKDGKYHLYNYYKIKILYNTAKPNSDSHYIVGFEVSPESRDFQNDNTCTNDETSFIMEKNKKVIFKYDIIYEKSDNSYQHRSEHYYRNLNDQSIIHWFSIINSIILIILLSGFISTILIKTLHKDINKYNRINTNIFETDDLDDRGWKLVHGDVFRKPRNSTFFSAFIGVGIQIICMIIVCAIISFIGIYKYKQRYRYVQIMFFIWVFISSISGYASSRLYKLFKSKHVKLTVFRTSLIYPF…
PY02266	Py	OG4_10467	+	-	GTP-binding protein	gtp-binding protein	MAPKKKEEEPKVLLLGRPKNTLKMGLVGLPNVGKSTTFNVLTKLNIPAENYPFCTIDPHEAKVTVEDERFDWLVDHFKPKSSVHAYLSIFDIAGLVKNAHLGEGLGNNFLSNIAAVDGIYHVVRAFENEDIIHTEGNIXPVRDMEIINSELIYKDISNCERNLEEISKVLNRNKKDKIKQNEHDVLTIVLEHLKEHKWIKDKAWKSSEIEVINEYNFLTAKPVVYLVNMSENDFIRQKNKYLAKIYNWVQEKNKGTIIPYCAEFEQKLLSMTENEKEEYFKANNIKTSMLNKIIKTGYYEINLIHFFTCGQDEVKCWTVRKGTKAPQAAGVIHTDFEKGFICAEVYKYTDLVEFKSEGEVKANGKYLQKGKDYVVEDGDIVFFKFNVSSSGKK
PY02272	Py	OG4_11732	-	+	hypothetical protein	conserved plasmodium membrane protein	MVIWKANPKNKNLLYLLFLYIFFISFTNCQLIKLDGQKINTNYILYVLKGLYIYGKDDAPYILLGEKKDMNNAIPHAIFENVGISTNEIKNTKYFTFGRKNNSDHDDNVNEKNDEDGEMEKVNNNNSTSYEEDDESEEKKKKKGFKLNLYKDNPYVQRKTEHSDLEDLDSNDNTSDLFLEIIIMKESDFNKLYLPKDSNMCCYTEMTGVDNNDKYTCPGKGYLKRYLDESEMHSLKVPIYFINDRIEDDNTSSGNEVNHNKFLELIKNEHIYNIDKTDIYTIFLSNCGDSKIYELDLHGNIHILNKYGYLPGDKITKLNLYVSLMLIYFIYSIIWSYSLIKNKANVIKIQVWISVCIFLYLLENLFLYLYFMTYNVQAKINNNYLFMAVFFSVLKNVCS…
PY02282	Py	OG4_34347	-	+	hypothetical protein	rhoptry neck protein 5	MKLSILFYVVASWYASEIQGKLHDVFVPKNISLFKNNHRNDSKLEHSNKNTFDNFEKKLLNDSNSINVMFDPRMKKVVPSKMRKQHIVGGFTQNSVDQADVEKGKYETDLVRFVFFFIALRFVENMNKQMVVLAKEMNYALKNEKHTTLEGYNRLTSIMKESLATMYSIDSIKNANIVNFSKYNTDWYAKATMKDKYDAAKHIQNTIDKLFKPSNKKKSVKEKKIDENIKQLETDLLLQRFVMDNSNVSMLLKKYEDSGDDKYMAPSYTDVCNQLGHPILSYVFESTYKHSVNNKLDSFKKYLPKLTTKLTKMVENGHIILVDRRFEQSLDAFKNKVSNLMNKKVGFIDMCSKKCFDDTVEINYKLDKYDIKLSPQDTNQRRGDLTRMVLYYYKEIINH…
PY02306	Py	OG4_23773	-	+	GTPase of unknown function, putative	ribosome biogenesis gtp-binding protein	MFFPYLMVICLIHKILCIQLKIVNENIKLEGINASRPKQIRRFRMYDAYSKNKILEKKLYFLKNVNKLYKNDFKRKNVRRKERKEDKTETEKNNWSNLGKYGKEVENTEFFQTFDEYFNSRSKEDYEQLEAGKLKILTENTNTYKDEIRKIMEKSYKSEYEKLKKEEEEDSKISHDVHENLKVTFVMKKNIDNFLFTQYSYMINKLKEKSEILKSLKNVFNNNKGSTTSDNIEENNNDQVCLDEKSEKYSNDEKSSKLREINKPGDAENALEFYKKGSNKENKLIEEVNFFKPQKGYAEEKRISTFSDQMFANVKIENKNLLIKGEEYDTNDGGLKLEKGEEVISNYNNEDEGTELFLKNNVSVLELFKENVKASLKYKKENIIKNNLNENLLCGRVKV…
PY02480	Py	OG4_30664	-	+	erythrocyte binding protein homolog	erythrocyte binding protein	MIYYFIFCIFFLLIFNRNKYNVINVNLKKKQKGNYLNWGTFQKKTKTASRLNYDNLCFLYSHNGNKLKNKNINNFYHIGNNDNTFKYGDKYIYNKFDNKTKQLYFERNGINVPADVAMFGKTNFYYIRKSIYDKNKNNLMPNEINSEYIEELQDSESAQFGKAENCDKAENCDKATNCGNTTEDINSDNNKNQVFNYINVERDYVSQVGNSPQVNVYERKYXADENKLNKIFENINEVNIQLLKDIKNIDDKEKAINKKVIEKVREDIKKYQETNEIMDIKGNIVKSEVSNKHKGKEDGQEDNNFTNSDMDEDEKNEVLKKLYMINKKTDKYLEEDIYFVIQSWLPDIKIDDTLIIIDNIEKNYNTFDISKYYEKFKEANKSSDSNKNIYDNLSNLQNY…
PY02481	Py	OG4_38906	-	-	putative arginyl-tRNA synthetase	arginyl-trna synthetase	MVWVVFFFLEGFEFKKVSHILNDYSYLYNHTNNKTGYINGYLERNKIISLKKIKNKQNIQNKQNKINTHLYSSLYSNPHNDIKKEVHIYEILNNAIKNVAKKIKKNENLLIPKQYLLEDNKLYDDYTYQTGIIMFIERDINDGIFINKNENEDKNVRQKIIESLKNECSDIIDDILLSQNGILNIRIKDEYVKTKFCKFHAQLIEHIQSKQDKKNRKNCEPKRDDKKKVVVLDYCGVNMAKHMHXGHLKSLFIGYALNNIYDYFSFNVKSGNWNANIAMVITFYIFFLSENCCNLFFGNSSSLLQNSENTKMSNNYSSDIFVEKNENFQIVKRYLDILNNLKEDNFYNNYEHFNINKLKNINLDNIDNAYKISKQLYSVNTLFQNCTKYILSLMYKYDD…
PY02484	Py	OG4_44643	-	+	RNA pseudouridylate synthase, putative	pseudouridylate synthase	MHFFISFLTIIFILIEIVQSFKIMKIVVEKTSGLNVVDKKFKPKYFIKNKLRFVSPYVYTYKLFAKKRWFGKNIVDVLAFEFCAYNTDYFLESIKKGYIKVNNKNITNDYIIKSNDFIEHKLLLFEKPVLYNKIIILYEDENFICVNKVASMPTHPVGSYQYNSLLRILQNYISQSGKNDTQNKHDNEINDDVVKIDLKFKKNKFNVLDTIYTQWKETKEKLKLKLKSSKCIFNNDNYEDINQGNSEKKKKKRKNYHNDQNCLNESGNFNKKLATNDNENKTEQLSNSLNIINTNEINNESSILNNELRTNVKSDILKREKNINLVNEKDFLNLHDNNKIYKEECKQINTKLNKYKNNEIEKDNNKDDSYIYTLHRLDKLTSGIVLFGKNKKFSTIFSE…
PY02486	Py	OG4_19700	-	+	Drosophila melanogaster GM01605p	phospholipid or glycerol	MMKRLEYHMITHILFGFHLRLFLNTIYNKKWEWDKYHIYFCILITYIILVVSYALNVYFLLHKLDLKNYPPEQIETYKQYKNSKNLHPYVAFERLDLVNMPIYKLIYGAIFVAPWKSAILLCMGIVNLSICMIFSLFSNKRNENEEGSTIVKIYLIILKVVCRFLLWVMGVNRIESHYLCDNEWPKNIVSNHTSGLDPIYFIREHACSFVAKKSLRKDFFIGLSIRVLKCVCVHREKPEDRKIALDSIRERQLAINKKNSNYPSFVIFSEGTTTNGIQIVEQKKGAFYSLLPITPVLLIFKYDFLNPSYDIIPYDWWVILMICNYQSIGLNAYWLPTVYPPSKEKYPNLSTEERIDMFHDEVSKIMFQNMKKYNPRAPQDIDDYNDWPGSLRIKSDFFG…
PY02498	Py	OG4_47482	-	+	thrombospondin-related protein-1	thrombospondin type 1 domain-containing protein	MYRIIFIISLLLLTSLLNCDAEWIGSTLKKDNTNYIINNKQNENIILPIFIKKGECINYERSEFFFCYHKNSEQIFKNISIGCTNKYIQPSSHMLREKCDLINYHNFLNNNKNQLLSYWEQNFHYFFLIYSKDIYFSNIYNLLKNRKPNIIIHNSIIKTICRIYNTIINSITRNKNIEIDITFWKSSKCNSFFSFQFYQFISKEKLRYPKSVQTYLYTKIMENIKIDEILSLFFEIYPTSHNSILKKKKKKIYSYSYFINLASCRVKKNSEKVYTFGGIFYKIWEFIYSIIGKGKKITSKFIWNSFYASYSSKGDIFMNGISGKVRIANGISRKVRNLNGLAYGEDENNDMINRRNFKNNTSQYFTCFLDKATENPNALNEIDKWVDPKTKSCYCHDEH…
PY02510	Py	OG4_10575	+	-	PfSec61	protein transport protein sec61 alpha subunit	MVRFLNLLKPAMFLLPEVQSPDRKLPFKEKLLWTAVSLFVFLICCQIPLYGIITSKSSDPFYWMRVILASNRGTLMELGISPIVTSGMVMQLLAGSKIIDVDQSLKEDRTLFQGAQKLLGLLITLGEAIAYVVSGIYGNLSEIGTGHAILIILQLFFAGVVVILLDELLQKGYGLGSGISLFIATNICETIMWKSFSPTTINTDKGIEFEGAIISLIYCLFTEFNKISALKKSFYRTHAPNVTNLLATILVFLIVIYLQGFRVDLSVKYQTVRGQQGTYPIKLFYTSNIPIILQTALVSNLYFFSQILYKRFSNSILVNILGQWQEIESNGTAVPIGGIAYYISPPNSFADITNDPFHTLIYISFVLVSCAFFSKTWIEVSGSSAKDVAKQLRDQHIGM…
PY02528	Py	OG4_10856	-	+	uroporphyrinogen decarboxylase, putative	uroporphyrinogen decarboxylase	MLKKFVCFIFLICLVNQVLCFIKIKKIKFKMLKINTAXSSHLEDEIYIRPENYKYQKFGRPSNDLILRVIEKKDSESGENGENNESCKDGESCENEIPFWIMRQAGRYLPEYRELKKNYNFFDMCYNPELSSNITIMPYKRFLCDMVVIFSDILIIFIAMGIDIQFIENVGPIFNKKINNLDDFKTLNLNLKEIINNLHFVYDSINLTKKKINNSVPLLGFCGSPFTLFTYLTKDNTSKLSPYENSLKLIYENSEDTHHILNTLCNICISHVLNQIDSGANLIQIFDSNAEIVDKNIFKKFSLNYINKIIQAIKKYRPNIYVILFIKDNFHEDIKNLDIDVLSITHKQLINNGSNYYYNLFQNKIILQGALDPHILLLDNKKNVQKYASEMIQQISHKN…
PY02584	Py	OG4_46231	+	-	hypothetical protein	major facilitator	MKLLRDHDNLFYENEEYEKIRKKTLFKILLSVFIKTLFESFLQPLLPFYILNYYNIEVKELGILLSFYSFSQCIMCLIIGLFSSINKKHLLVFLILFNLVGIYLFYIKLNFTLLVVNRIICGCSSVFVVVVNAIINDLVDTNVCIYYTYINIFNAIGIILGPLLSSFFLTIFNFEIILNFNTLGLISSLLIILTISSELLSQNKYKTPTKLVREYKLNQDNKTNDKLEGEDNANTWFTYKNYNKHDDQDKSVLNKYYKKEDPGSVHNEFLNNKTNYSKTGRKGNIFNYYNDDISDKSYQQFLRRTDYLFISRISLYIKNMFNKIFYASLTYKSKCLLSICLLRFSASFSSNLMNNIFFVFYNDNVSSGNISISFPSTLSHIFSILLLSTSLQNSVK
PY02588	Py	OG4_38886	+	-	SAM-dependent methyltransferase related to tRNA(uracyl-5-)-methyltransferase	23s rrna (uracil-5-)-methyltransferase	MYSIRYNKLFIYNKFKANALNFNIIKRQISDICETKIIPINKSKEYDKFKIYRNNIYNDIYENQIIQGVKVHNLDPHGYGEIALYVTKHYFLLFLKFFLLIPDEQVNLKVLDINKKKKKITFQVLCKNKKSKYEIIPECEHFSKCGGCMYQHINYDFERKLKKNLLISLCIKYKIDILISDKNYLQNDHHFVKENEKINEDFVTISEIKQEYMSNDLDNEQGEENSLSNKSPIAKNDNDSYIYYNSNTGDSDMCENNNNQININHGHTKIYDIIHSDCYHYRNKSTFHFSVTDKLSIGFYKRHSYEICDINECYIQDKQIQKIYEDIKNEIIDNFKKNNIYIVNKINNNGYLKSVDIKYSVCNSENQILINFIGCTLTNEAKKNMINIANNIAIKNKSI…
PY02591	Py	OG4_38838	-	-	MORN repeat, putative	morn repeat	MDLFIDKQKELEIXNYNNTCILDNIHSPIKKYNNENVGKKEEYKDDKLLPCYIEIINNDLIIYFFDKYNNSVSWKIDKGYYLIKIKDTTDVYDDKKNNIISNQRSKSKDFYKYSFTENIYLSSNDDDSSNSFITSFNKGYSADNNNYMATERIEQVKMRRRKKRKKKNKKQIEDLNKEQIHNFNVLKPNDDEIRTNPLFMNSEINGLVKTLYIFSDCFFNLKNSLKKNSCIFYMCQREYLNENDFSCDNEVSNIQLVIKIKQSIIPKLRGEITINYDKFNNLNETNKFLIKQKLKDISLNISKIYKYNDSIIEDMFYVDANSQHIQINLENENNKTIFYIKPSNHAFQNEIFYSSYSFNAKREMKPNKDNWYELNIFTHYFYKQKVDELIENTIKAQST…
PY02620	Py	OG4_54825	-	-	hypothetical protein	calmodulin	MEYEGETFHLTEYQINKTIKAFKYLDKKKRGLLKFELLGKLLRCSGYNVSLQEIDKIKMILKDNKIKASNIETNEKKEDEIVINEDKEMIDNNMXNSQMKGTNENDESSNISKLLNNLKNYDNFMELEKQREELKRKEEEDKNLFSIKEFFRIIQIPNITNEIKPAGVLNAFEIFDEKGDGKISIKKLRFILQYLGEPLSNSEFDEFFEWLKTVSMG
PY02651	Py	OG4_48472	-	+	hypothetical protein	hypothetical protein [Plasmodium yoelii yoelii 17XNL]	MNLFFYFLFLYATFWMGRSEKLFSDMSIKPMHLRKIKSKNDIHEDNYYAIDDVYYVEDTIPKLENDINNSDKEDNIIDHNDRVKINNLSKLNNTNIFKSMNKLLYESKPNDKSLNRQITKILSIILNTPKNETINVKDINSLLKKWKDINKIKQNRNKLNNNVKKNLINLHNFNKNTKGSDKFNTFDELNNKDNINGNIPKSDFINIHYLLELTH
PY02744	Py	OG4_64938	-	-	hypothetical protein	hypothetical protein [Plasmodium yoelii yoelii 17XNL]	MFANVCYITGFEKTAIQELDHINMYREIKNKIKIKEIVKNMNKYFRVYFKTILWSKKNEWLYQITKLVLYKLRCSEILEILNKDCIKELLKGLYNIIKNNYRLLLVLKNEFIILLKTKSNYYYLISRYILDIIAHNLESIKVTHDKIEDYYITLDSFFLKNDFSELKFWMSLIHAFTSIALYCHGLSNHILITYENLIIQNKYPLILKYIIIENINLIKNISYTKSMR
PY02780	Py	OG4_10136	-	+	aldo-keto reductase	aldo-keto reductase	MKKCGLKWVYFFVFFVLFISINIKCKHVNFTLIKNNNFPTYKGAIYGGNEFRLWMKNSENRENCKINEKKKGQEILRRKPTLMYLIKKGTKNRKFIKNIEKKVTKIILFTTNSNEKDENIYDIINKKGYPNGPNNEENFTFIMGKDQEKVENKMEGENYNSLYNNNNNINKDDDVTYKYVEEMESKKVNIKGVEINYKVYNLEEGIYLIDNENYEKVKSLWNKDELQKAKENFEKSFDIKKQGIKDEDWIMLPLDYDENQNIKLVKADFDNPSYDYILTYYDKERNYYWEYKRRNYYKMFKNTSDEIPSYMSELEKDKRFYSKEIIIPKKTLDNKIFRQPMLSDVLTSGYSKEPIGLESWRYVKYPHGNLIKPQKYSQLYCTKKNGKDKPDMKYYYLGN…
PY02882	Py	OG4_42713	-	+	Predicted pseudouridylate synthase	pseudouridine synthase	MFPSVQLKKTIFLRLSKILSLSSVVSRNKAQELIRSGNVDNQIVKQNTVIDVNSKIEVNGCEINVDITTKLWGIYKPKHVFCNTDQNYIYEEKKLINPQKKDILLNDGNDKLQISSEHTKKILGENNMMNNKTLIYKSDFYNNNKMSRNYNNNIIDQNIHFPNYTETKMNKRKIQDNEKKITLSTNTSKLNVNLFDFIKKKNILYEEKNKIENYIPEHLIIVNSLDSDMEGIILLTNDGDFANKLKDINNNILTTYLIKTQEELTNEKIELLRKGCTIGDIIIRPLELKIIKPNFLYKWLKLTYVEKSQTHLNLLFSKYNMTIRKCKRYSFGPYKSSDLSGNFLTPLKIHSTINHLIPRYEYKLTLSHPTGNILMDSHQKCIKIKDYLNDSVIRE
PY02938	Py	OG4_10273	-	+	pyrroline-5-carboxylate reductase	pyrroline-5-carboxylate reductase	MENIKLGFLGLGQMGLALANGISNSNIIKKENIYYYSPSKKNTDFVYMNSNVEVAKKCDIIICAVKPDMASYVLSDIKPYLASKLLISICGGLKIKSLEQMVGDDAKIVWVMPNTPCLVGEGTFIYCSNKNVDAQNKKYVNEIFNSCGDAHEINEKHMDIGTAISGCGPAYVYLFIESLIDAGVKNGLNRDLSKKLVLQTLKGSVKMVKESDKPVQQLKDNICSPGGITAMGLYTLEKNGFKYGVMEAVDAAFQKSKSMS
PY03011	Py	OG4_48314	-	+	early transcribed membrane protein family	early transcribed membrane protein	MNTLKVFFVFYVLYITTFFFNPCFCEDADYYSEIDDGALDSIDTAIKKKKKRKSVAIALLSSGLVASVIGVLYYMYKSHNKGRHDWNKGFNFFPFNKQTEYKQPDGEKPSTSTKYEEPLGVNKVNIKGKLKENNNDIDVPLKRFNTFMDNVKLAAKHHFSNLSNEQQKYLIKDYDYLRKIVQTLDENKDVNISRAQEDIAVLGVEHFLKEQYQPK
PY03073	Py	OG4_46189	-	-	hypothetical protein	hypothetical protein [Plasmodium yoelii yoelii 17XNL]	MNKVKQVMKNSKNVINYIILIFIYIILWIYLYFYYLVRNIKKFIIFQLFDKFELFKKTKWLIYNFTLDDLLKKKDNFILTIVGFFKNRKDKKKLLKTRINKIPKHIYIVFKTNDIIILNETKFIKYIIDIIIYLYEHQVQYLTIYISNQIFNWTFYETLIKDLYEHNYFTKVNNYSNIFNDKFEHNNSKSWDSKQNDKPPNCSEKLIEQFVITKFAPIGKKIPFSKREKYESLKNKFKYEQFSIYLKFMNKTYSHEKLIDIAEKNTVISKGVLVSDNFNSFNTNIEHIIKKVFYLDHKNMYHTINKTRFINFVHNLFNLFIVSKDLLVDFLKEKFKFFKLNKHLSQFFVRIYKTVVILFYSVLKLLKDEMRVVKKTNNEINIFDKFDFKTEQIEETNFI…
PY03076	Py	OG4_48129	-	+	hypothetical protein	mac perforin domain containing protein	MVINLKIKFPKIRHALILGFFMVGFVMCYNHNDEIKEEFLSNNEIYNKYIGKGYDIMFGWPLPNNELNEDVGFKEIIFDTKNNIEYINENVCHKEEYFKFIEDINDVAYIALNNINIDDLDRNINPFSASIPYKGYFTDLEIKKRKYIVAENTCLHSYATYSLRESTKNINSDFLLDTESLPILSKNITEKTCSKLVYMYNSKNEQCIKFIKPWIDFFRKYGTHVVVSAHFGGKTINTLEVPIHKFEELKIYNYKYSIENNRYLDVFKDRLLLQKILKIEKGEYAYRNDSQDNYMQDEHDEKNDDDLEKKANDILNKYEDSNSNKINLDIKGGNNLNDDWKQLTYEKWKNSIYTNIEPIYLDLFSLSSFMHIEKKESYNNALLYYNNLFGMNQENYYYS…
PY03129	Py	OG4_48182	-	+	hypothetical protein	hypothetical protein [Plasmodium berghei strain ANKA]	MYKDLLLCVFIICSSVFNESKIIQENLDIPNYQNDNRYILLDNNNISDFIQIKENSFLFNATCKVSNILNGITDSFPNIKLLTGWLNKFEFNNNNSYDKDVIEKVLEHTWDLENKEFIVTAKNIIKKYIGNDPFILQVGLNSIAPLILETPENVIHIEEDSETCKNFFLYKKNRCLLKLKGIEFYCKENDDTSMDNNNNKKNNISSEQNKEDIYETLDLITKIYQNKNNKVIDILIISNKYPIALLYYIYPYLDSSTLVILMDNLNHKMKNAIFQYYNFIGEADFSRVFEHNIFNNYKSSSKRKRKTSNIYENDEHVYIYNKMKKSPFYIMALSPKIKLNPSEEKYKLFISSEYASSYENEISRMLKEIKNTLKMNKEFYEKYKLLLNNYFSTINEFEF…
PY03139	Py	OG4_30685	-	+	hypothetical protein	hypothetical protein [Plasmodium yoelii yoelii 17XNL]	MRAFIFIINCLILGNLKNVQSTNDSNNKNNIGVSEEALSKLMEMKKLELDILKDFVKKDTEHSDIYKKFHCISSDYISFDKKEGKDGQTNEGKSGNKSEQETKGSSFIDKITSFIGIFNYNKINNIYSEKIHRMHNNIQEENNVPNEHTSDKTEFIENHEITKNEKPNSYMELSTGGSSSKGLFSSDKERANENYKVGNLGSFYMIFGASNIDYPWACTCDPLQLIEYKEKKRSYVLCSNQVDMSIQNSDLYCNPKNSSHYFYLSYILILIIIIISS
PY03164	Py	OG4_27903	-	+	hypothetical protein	conserved plasmodium protein	MLNYSKYVYIKKLLLIFICFIPFCENYVKKCISYKNVKYPSKPIIRKIYSLNQPINNFKKFSFFLKATEELDDYKYFTDDEYIPPLPPVETWEDLIIKEEIRNKNEDEKREMDDYKLTHESREKVLDIMRQTRLINHCNYEIQKNKQKNILYFVTPKMGAYCKLMENDKEKMESLISKVKEKFGRKVKIVNLKLDVKMPLFEIFLQANIHTQIKIFYARGRTLQYRLPPPFWTKCKILKENKILQEKYGGECAPGLFPQYDEYQMMQIMTECVYNDKYNYYVYDVNLEWENLCALTPENKEFRKLVHQNVHVPTRLAVIKAFEEGIEDFRDVIKEEYLIMLREQRKLKENKRYKF
PY03201	Py	OG4_118376	-	+	hypothetical protein	pb-fam-1 protein	MNKGYINIIFAFLSLIWHMNNKAFASEYDPNNVPSTSASNCSGEKCKEINPLLCTDPEETKNASELMNEAIMLLQYHATSIEDYSLLHKHDDGSSEYIKKHGNADIHKFIHKMPNPDSYDSIINILFNYDCTHKIGTSTVKEKVVREYTPNLVMVQQRYKNRDLSFQGYYYALSKKDQISNDTTVIALASANINDHNKADKKIYKNEILESANSFKTDIDSEEDIRKGKLKKMFVNLSGCLIIKKLNYIDIIHISSMNVNPIHSPNERIKKSIAKKLETFINLRYIFSQK
PY03207	Py	OG4_23358	+	-	19 kDa sporozoite antigen, putative	profilin	MEEYSWENFLNDKLLATNQVSAAGLASEEDGVVYECVATPDENNPDFDKWSLFYKEDYDIEIEDENGNKTTKTITEGQTILTMFNEGYAPDGIWLGGTKYQFINMEKGLEYEGYSFDVATCAKLKGGMHIIKVGGGHILIVLYDEEKEQDR
PY03214	Py	OG4_34378	-	+	hypothetical protein	fibronectin-binding a domain protein	MLLLRATKLLISLIIFPCMMNNTSWLLIFSKRINYHKKQNFHFVSLNSRTKVNTKRNVFYYSINTKKKFSILKSSNEQNSTSSNDDNIFKYTKYDKSSDTYIKLLEKKAEEIRNSKNTFGNKIKLKKKTHNKNEDKLSNNFQHLDYTTLQLLANELNVLLQDSIVEHITQTDNKTIVLHLNKNGREYYLYLCYDNENPIISLGLKIRKLFNRFIEDDYAQKLNPILKYSLISDIYIKNKFIKILCIDFILKRKTEXDIDIIDILPSANNPNRKVTLIFDLHNKSCISYVINKANNEILISPHNSITEKTIDKSYKEGHTYIFPTKDECKLIPNHYEFFSSFINLFKSRKEQSFISSILDLYEGVSYNLLLKFFDYLNIKHNVKFQELDQTLLLDFFNKA…
PY03236	Py	OG4_11727	+	-	DNA replication licensing factor mcm7	dna replication licensing factor mcm7	MGEKGLDIRTFVDDNHTKYLDAVKNYSSHIDELVKFFDTFEDPSINHINWGKLKYKGYLQKIYNHDTEILPIYLDDLREHFCKENKDADYSVYNGIMTNTHRYVELLYTAADKCLSDECYKRFIKEYGEEDETEKTKRKNLRRINNEDVSGYSTDESEKEAFNNLFRDMIKPIEEIREERMKEYKLPAYLRVNFEIILIPSSRDLIRKMRIVNADCIGSLSTFECEVIRATQLKPRIQVATYECDRCHVFAYKAVDGPFFMPLFDCPGCTNVHGIRGSLKFQAKLSKFVKYQEIKVQELASQLPEGDIPRSMNCIIHGASTTSVQPGMHVTLTGVLMPVTKSGFQALKGGLIAEKVFHIYYVQNNKENFNEHIDNYDKIMEEVQKLKSSPNLYERLAYN…
PY03243	Py	OG4_48277	-	+	hypothetical protein	hypothetical protein [Plasmodium berghei strain ANKA]	MKVVGLYIFYLVPFFVISSELNDYEKIKNIVNEANECSEKDVEFMNNYVNKMYWVWTNNFFRYLKLKAYIYENDIIYDKIIKMENIIQLLTDNFIMYKNKEEFIRTALTILSNEKHLKNVINTYVPRNKIKFFQDLSEDEIIKLFIDEKNNVINSFKNIKKIEEFRDVANSKYYYHKKLLENKREQTVDDTIVPEKKENQNDEINNNGNNKQAKNVIIFYMSDILPVKSMSFDFYDKNKWSTYFYFNNDEERIAIENDSGNNFSNKNSVIV
PY03253	Py	OG4_44547	-	+	asparaginyl-tRNA synthetase	asparaginyl-trna synthetase	MRIFFILFFYLAPLIFLLVKCINKIPREIKKNNILMCDVLKKQRELWRPWKIKLRKINTFFLNNHDKMIYAFSKGIVNGHNFVRTHHRGTRLFSTEKVGRTKIKELYNLEINNSEKKNYKICGWIKSVRTVGKNGFAFVDINDGSHYKNFQVVIDSGISNYQNLLKASRDDAIECFGELKCPIGKKQKVELSVYDSGKKHYIKLFKELNTDNLASSSSNLSTNNIIKTNTDNEKKCNMIYDNEHMEVLERENHEKSEKSEKSEKSEKIEEEKNETELKDVYMISKKYHTKEYLRNFPHLRGRTKLYSSIFRLKSDLIIETFNYFKKNNYTYINTPILTSNDCEGGGELFHVITSPNKNKKTEIETENINFINEKNNNFDKKNSEKKQFFKKPCYLNVSS…
PY03285	Py	OG4_84493	-	+	hypothetical protein	pb-fam-1 protein	MNNKYIKIVFLVIGLFAYVSNKALATESADSKSVRKKSIKKKDASKEGSSSNATPSSSNGNPNTQNGEYVIPLCTNPEEIRKASELMDEVIKLLQHHATNEEGYDMKKRHDKHITIQYKNNKGQGVQKLDLKIRNSDKYNEIIQMLCESKGIQHFGDIMVKGKFILKYTPNLVMIKQRYRNVSKTFKGHFHALFSKVEISPNTTMIAYASADINDQNSTIQEINGNGTSINGASLESDNNSQEKAITGVPKQKAANIFGFLVKKEDNHVKITHISSINENIPFSHNYIIQIVKTNKLAAIMRLRDHFTSN
PY03312	Py	OG4_17794	+	-	solute carrier family 22, member 1-like	solute carrier family 22 member 18	MEVTSTLLKKSQMFADDSSDGFPTTKKFFVSSIGKAHLINSLYGIGYTIQIAMLPYLLINSKAGIEHNGYLLTLFSLLQFIGSIFFGRIADIWGVKRSFYLSLVSSSIMYLMLTVCRSVLGYYISFFPSFFMQTFQVSSLLVCLKTENDKRTAAIGYLNLSYGIGIIMGSILAGMLVNILGPRGNLFVAFLSQILALYISKNLEEDPKLLINNNIEKIKLKEIFKTAQNECTRLFKLFKKTYGICLLILFGLLPILMTKFAFAPVVVDMFKLTPAHTSYLMTYAGIITIIAEGLLAPYLSSLLGDMICCKFAIPLTLSGFLLLSLCGANEFFVLLFMIIPLCGGALLYICGTSQMTKRVDESELGSIIGLNTSIFYAVTIMAPYLAFKSYIALGLGLYW…
PY03352	Py	OG4_64941	-	-	hypothetical protein	hypothetical protein [Plasmodium yoelii yoelii 17XNL]	MAIVNTTFGYLRQVIVSCNKPSVKNMLKKVDLCTQFVRKYNSVNSHFVNFKNNKLIIFDRKHFSNYKNNQINENEQNENNSDDENDKLILNDNSDSDDNDIAEQNDGSINYNCDTVHTNKPDHEEINTSKPMRIKRSKYDSDVVIICEDEMELTERMGSQTLSEEEIEQINSGIPNLELDRYSNNIVYNTKKK
PY03370	Py	OG4_11127	-	+	ribosomal protein S15, putative	ribosomal protein s15	MRIIKLSLSFLLLLCQLFIFKIDLLNGFHTGNGKKYFYYNYGQFINLPNFSIHNKNIYKGKYIYHGKRSEILKANENVSPSPVKDNTTNNNMIGKKEKQKSEINNILKESENVTMGRSFSFNMDMLSIKPELLKELITQKYRKMFERHDKDCGSSEIQIIILTFKIYFLTEHMKKNKKDFACLRGLFKCVSKRRKLLVYLGRKNRELFNKITDYFKIKKPLLPRTAEYYSKDLKYIHFNNTKRFKNNSEKKKKDKTKNKKVQTDKIIFGN
PY03391	Py	OG4_37939	-	-	hypothetical protein	hypothetical protein [Plasmodium yoelii yoelii 17XNL]	MKDQDMLSRELSSNGSIKLNSKSLSHISSNLSATKNPNDTEDALLTPTKIQTPETSHGSFDINEDKEISYKRFIQNARDEYSIQQMEKFLKHGIADNGMRMMTTDTSSWLVT
PY03392	Py	OG4_27855	-	+	hypothetical protein	hypothetical protein [Plasmodium yoelii yoelii 17XNL]	MNKLLFFFFCFFLNIFFYKVCCEKTALLPFSDILSTVSDIADVISPKGENDVEPISDPITRINLKIVPSKKLNISKNDMVFLLSELKQEIRRQVSMLE
PY03427	Py	OG4_48101	+	+	hypothetical protein	hypothetical protein [Plasmodium yoelii yoelii 17XNL]	MYIEKKRTSLYYIALLFFLIFKINLNESHSQFCNSSIGVAKHLNYEGRKEQVCNNGIIKREYIKYICKPSNNNNNNGIRNRKLNHVLTIEDYTDGTQKNGKTKKHKYNFLSNQHSIVKKHKNNIAYKNWKVQKISVLNYSVNNINIAPILWGKNDTNLIIKKCQLRKKNTNIPIYLMTSTDATIMDINVSPDISSHIETDRTRKICIKAVENNTSNKLKSNDDDDQKIKTNQDEKKKKNSTKRVLSEESKKSMKEKLRSIMIKKWKDADFRKKMIKSFKKRGAHHNKKISDTIKNKWKNDKDYKLKTLEGQRKYFIKKCKNNNAISSKTREKISRSMKLYWQNKNKYKPSQPNNLQSIIKKKKQKKVWENIYSIILNKNVNDFNNYQTFHHNLSINLQA…
PY03460	Py	OG4_54818	-	-	hypothetical protein	hypothetical protein [Plasmodium berghei strain ANKA]	MKILKNFERFIILVVLFNKNNKFINCNNDEDNKDTNIYISKCDKFPNFLEKNSNIIEGSENLTYEDVQKKIFDIDLNTLHVSLIKNLQISKLKSIIDVKTAIFNCLIKTITQMAKALPGILEEIFAHNEFCGSIEKTFSFLFEIDETYEFMIKKCFDLTKTAILYNYFYSYIQDIDDVINVYRNDPSKIFSKFDYIIICLNELYRKITENFHPYVKDTTVFSNFISEFKNKKNEKIKDNINYIEEFIKYFRENIHNINVIVFFEEIYGFYSVNNLYVSCFYVF
PY03472	Py	OG4_45849	-	+	hypothetical protein	hypothetical protein [Plasmodium berghei strain ANKA]	MKLIILIYIYSITFFMVSSIKIRRNNYYINSNIFRSKNTNSLTHNKSAYANNNNKGQTYIQKAQSCITDIRKDFFKQVINNINTYGIAIAVFAFSSLLGLFYKTKNKKNNENATKNLNNDENELSKYRCMKCNLLIYPAKGREQKFLKDLFYSYFFVFFCIFFVFFFFFLQK
PY03490	Py	OG4_48163	-	+	hypothetical protein	hypothetical protein [Plasmodium yoelii yoelii 17XNL]	MIFVYLVLLLKSLIIINASKISNYNNINKRNIFFMYSNINKNRYSKIKIAHDIFLKKNRYFENDLPHTKILLVNLLDKDQNEMFDFSNNNIKETSTNEEKRKKKKKKKNIDNIDNKNNSNYNEEKNSIKTTLAKXKKFCNYLTNKLGRLNKKLREIKKLEAIFYANPNILTETQQVKLSKKKHLKNENRFN
PY03510	Py	OG4_48328	+	-	hypothetical protein	conserved plasmodium protein	MENNSEEYDALAEYRNINKKKYEDRIMKENEELEKERIQEEMNEKIQNEYNYKQLQIEKDREYSMQYYNAINNINPSNNIQTNYGSIVLNNYTERLINPSNYRYQENDITQNLLNNSEQPSFFNRIRYSFFS
PY03512	Py	OG4_27883	-	+	hypothetical protein	conserved plasmodium protein	MKIVVFDFVVIIIFYLQSKVQSIYNKKNTSLPLFISSERNKKIIPRKIKNKNFKTYIWGYPIYDDSPFKLRRPKIYPNFEYGELRKSQDFDYVVSTNISQNNYQIPDVGYLYNVDEMGTGRTDDVHTPIEMVFGGDIDMKEVEKIKTVLNVFDQGNGMGICTLMGAKRGHFAFKYNGYLCHFHGIKSYLKFLINRHYPGAKVTMISEHWIDPIDEAVCVRHSNIPFSKIGHQRKLLFNKYDYIYENDKNKRIYKAENKSNVWAFYNDPQMLT
PY03515	Py	OG4_37658	+	-	Plasmodium falciparum CPW-WPC domain, putative	cpw-wpc family protein	MFLLAFFIFDKENFFFVQSLSNDKNKYVNILNANNIENIFNDNFSFIDSLINSISKILKKVPLGVLKKKIIAELGKVAKDLKLPNPDEEICDINYSELCPEGWVNFGDGKNCLSPSNYVGPCKKKVSFKNKTAINKYEFSVKCNVSWPCIGKCVEDFTKNCPENWILKKKNICYAPKSYKDICVKEKNFTNFSKSEKKIWGDICNVNWPCYQKNYNILCPLGWKKSPDNKSCIGPESYTGPCKNILYLNNLNKNEKILLKNICNIEWPIYQDNEQNFDSFLCPTGWNLSQINNSICIAPKNYIGPCAKQISLSTFSKEDKSNFSKNCLVHWPFIQNTKNKNSNQNFNFPCPDNWELINQKKEKNICIAPKNYIGPCNNIVSFKNYTNEMKEAWAYACKV…
PY03586	Py	OG4_54936	-	-	hypothetical protein	hypothetical protein [Plasmodium yoelii yoelii 17XNL]	MAKESAKELFRQMKNELNGGREKPNCLDVMSCEVSSECEDLKTYHNEIKYLKKEQLKAYICKLKKEIKNYKNKELNYIIEIKYLRRKIIRLQNVIENDKVLKRDQFNYFLNHDKRGYSLKNYNNNMDIGFTENVIFTDNNFINKNRQHSFNRSATSLIYDNNDRNHKCGINDRCGSNGNSNMRRQSCGNKSFFKSDSIRSINQDIHKGKRIIDKKDEDYEIYNGISKEIVGLKNKWKKIEKQNGNKKIIHTIKPIEKVYSCGEVFDNNKIINSKNYDDNMDKYRNNRREHSLYNLNLYKNPKNIGSEKGEKKEIFVSNRSYSSTSKFELKRHLISNNKNMSRMSSHINSIIEKDINKYNKSKENILYQKNEKTQSKNNFLNALTYENKHRSCSSIHSNL…
PY03616	Py	OG4_42805	-	+	chloroquine resistance marker protein	reticulocyte binding protein 2 homolog	MGNVIYICVFVFFVISLNCSNGYKRINKKPYFFVNLRNCNNHNNNNNNMFNNNMLNNEFFRTNRYATKIKNKLNNIKNIHVGELKIGKIYDIKDNNIYVKLKNDSEDTVIIKRENNYLLENELLYDYLLNKNLIDNKLYSKLIKKKSNETEEDEINKNNSNKTDDCIVLIKEINSTKKIIGELYTNEIRKRKEKIYDKLNELKNIEQRIFIKILKNVRNKYFIVLINDCIKGYLLYEENNNDPEYSNLLNSKETQLSDKKLSAYIIDANKKLEYVFLSLKKYPKEDLENKIQALQHNIIIENLFENNYFKGEISDFCNDGNNIIVKIFDNKKNDIKVKIKSHNIINTKNILRNFDYLKNKVINNEFLMRTNYSTQNYKNAEDKTINYNKTTTQREYYDD…
PY03673	Py	OG4_34342	-	+	phosphatase	dna mismatch repair	MKYRVVKSCICIFIIFLMSLKNTMSLKKKLMFIYSNKRRLISVNIKRKGIIYLNKKFINSLIYTKEDEIYKINDLKESYKLRDDDIFENKDKYISKEDTNNIISNSLCEKLSNLENTKCENDETNISCSSNLRNGFTPSDYELRLYKNKCMIPIYWIKKLEKLKNINAINCIEYLKGDNLLYFDHYKNKGLLKFLNDEKKKYNNCIILSRVGDFYETYGLDSIFLIEFLNIKKMNNKLSCGFIKSSINKALSILTNNNLNVCIYEEINEQSFKAKKRYLSQIVTPEMPIYLNNIQYCFENDKNKDEINEDNTNNSFPNYYDLDIKEIVCIYIQGKNILSLSKINLSLKTISIYDNITFDVLNVYLKNTNFLKAYIHQHNNTTFTKKITELFKIENYYLF…
PY03772	Py	OG4_13750	-	-	hypothetical protein	endopeptidase atp-dependent hsl proteolytic subunit	MFFKSLSNIIKPRKQITTAIQRSYFSDNGKIVIPRHGTTILCVRKNNEVCLIGDGMVSQGTMIVKGNAKKIRRLKDNILMGFAGATADCFTLLDKFETKIDEYPNQLLRSCVELAKLWRTDRYLRHLEAVLIVADKDTLLEVTGNGDVLEPSGNVLGTGSGGPYAMAAARALYDIENLSAKDIAYKAMNIAADMCCHTNHNFICETL
PY03872	Py	OG4_17513	-	+	hypothetical protein	atp-dependent clp protease adaptor protein	MTKYLNIFFFALLYVYFFKRTNTYNKQNFNSHLNFINSRKFKIISNHRNIYNSPLKSKNKKNVTYASGNTNLENIKKLRNVIKDIKKENKREYADEEKLKREKEAYAWKVILYNDDIHNFTYVTDVIVKVIGYISKAKAHTITVEAHSTGQALILSTWKSKAEMYCEELQKNGLTVSIIHESQLKGGKDNIEP
PY03873	Py	OG4_46055	-	+	hypothetical protein	hypothetical protein [Plasmodium yoelii yoelii 17XNL]	MISSKSIILLTLFTFICNTSEIYTFKNDCDFKFNVKLLNDVYDKYNGEPINGYENNENYCTNLESLNPIKSFWALKLKSLCTEETSILDKDVSVNVCSKQYSSTHVTINDISLENKTTNIEFVCAHFLYNNNKEIIKCIKHKVLGNYLDSYHIAFDLSMPHELLKQSNHIEDVLNFKDLENFPIVKRIVDDATCRIHSSIHIIMDKHDFYLLKSLIGLCTKLGFHTQFIITDNIHPLLYPLFKDISYSLSSLNFAIQNSIIFYTRYEYYLYNLKISDIDHVLGSYISPSSLVLNQHNSYVTWLGLDKDNDIYMKKFNELYKIVGEAQYIERIIHCYSKYTSKYYEESIKYFLKYIPENKRDSMKNNPKIFIYIINGLCKDIPSVHQCAKKIISLESIYD…
PY03879	Py	OG4_25260	-	+	pyruvate kinase	pyruvate kinase	MRLSSFYLIAELITCFVYGLKNNSHLNNLDLHHTGDGLLFLNNAYINKTLENKRNRITAKTASGKKRNAIYSQNNFEDLQNTNISNTDTKTNKLSFTKCKQIATVGPSTEMFENLEKLYLSGIDVFRLNFSHGPKSIKKYIINAIRILEKKYNTSIGILGDIQGPKIRIGEFEKNEQNQIDDEKNTFVELKEGDTFSFDLSNKLGNKNRVFLNYPDLLKNVKPGQIILLDDGNLKMKVEGIAYNSDQDISVKATVLTGGKLYSKKGFCIPNMIMPIEVLNEKDIKDILFCINEGVDYLGYSFVQTEYDLIFLKNIINDYYESDFYKNIKKNRIVYDVNELQYKDYDDNTDFYIKEINDYYNNYYLKNYHTYKQIYNVYKNNNLDVGDMDQEMNDRGTHF…
PY03989	Py	OG4_37806	+	-	DHHC zinc finger domain, putative	dhhc-type zinc finger	MFITKEAKAPLLLPLYRVYESNNIFLCQGKVITGPNIFHLIFTYLIIIISVLPIYVIICPYIESFTILGSIIIALTVFFILVLFFLTTTAFCDPGIIPKKNYVDLSLPKGRTAFTTAKINGTVIKQYWCVHCNHFKEPRSKHCYTCNNCVTKFDHHCVWLGNCIGIRNYRNFIFFILNLSILSTIICFTFIGIFVNLCIKEYEGVKLEAIYNIILEFPHILYIIYTIVLSLLLTNLFIYHLKIILLNKTTYEDIQGLYTEGSPFDEGKFTNLKKFFLSPTNN
PY04025	Py	OG4_48018	-	+	hypothetical protein	conserved plasmodium protein	MNILLYFCVNFIFVISIYCMPPFKKGNENFPSAASTEDTINVDSSYPSFNIHYNFEPKDWRNIELIDNENNNFLNEINNEIKIMEE
PY04086	Py	OG4_42735	-	+	hypothetical protein	hypothetical protein [Plasmodium yoelii yoelii 17XNL]	MNCSFVTLINFIFLFALNFDTYVLCAWTNEAIQYRKLNRVNRILSNTKSDTSDEKTKETKFSNDSHKNGKGEKSHKKKGSNDHIEGENSESKSSIECENKYKDDLLNESNGSGDFSHSVKEGAIKKYQCHSSIFNCFTKSRNDDDDDDDEDSYKQKDTNENNLNIKPDDDPDEGHSKFWRNKKKNKHGIDTNPHKINISYLTRKKNPLPNYEFNLETVTKFIDSNQKIIDLGNDTIIKDNMNRSSNSVKSRDMLLNVSLKNIDNLFYDKIVTHLLGYAYIFYGHKVNINKLEKELIKDYYYNYKVLKDSINNIPDEFKYTQNNSKIDPVYNLLDYLGIEKYYYGFNRNLYTFLFLAREFWQKEHALTKVYESLPVDFEFDRKELIEQIHDSTSDEKDIY…
PY04160	Py	OG4_10811	-	+	unknown protein	met-10+ like	MLFKIALIVYFLFFNYVYLLKKKQRKFYNFQIMDTKNIKSLNDVKEKLRYKKEAYCLLLNKYKVSDILKNKYVKFWLLNIYKFPSVLIYNDYKNLTEDRDGENILKCMYNYFEKNKKSEIFDKNSETVHEKLIENYKDSDIALNNNIVQNSDEDIFRLVPLNNYFDKVVNDLFKTEENIHVGNINNERRDDDNDGNDNDNDGNDNDNDGNDNDNNFLSEHESHLGLNNVEINDDKKKNSIKRKRNIYEMDHIGEHDICGFNDENKYIDMENIYKKNKIDYAKELFNEIKKNNIKIKVVTLNFGYENMNTSEVLRHIFPSINEIIHKFEIIGHIAHLNFCNKLEDCKKIIAEVILDKNKSIKTVINKKDILNNVHRTFNIELLAGEKNYITELKENNIKI…
PY04163	Py	OG4_34333	-	+	hypothetical protein	conserved plasmodium protein	MIILKILFMFVSLIQSFMIKKIKWGEENLHGSQFRLYKTKYFRKFKTIPYLRDSGENHIKELTRERVKLNKHTTNPITRGANFLFICNLDNRLSSQDVTHFFNYFIGIGNCVAQIKRNRYTGRNMGHGILKFKKAEDATIVLLNYQGIKLGEKNIILTEAFKNDYLEQKKHICNIFKPRI
PY04165	Py	OG4_25876	-	+	hypothetical protein	blood stage antigen 41-3 precursor	MLYRLNFLLFCGVLASQFLQIIMSDEEVQGWSTEYKYNSKSLPSIEVKLSPPENPLPQVSAEIKILESARLKLEEMQKIEDEYNKSLANSKIRIDDTIKKMLSIFSDPKMLGFIVSSSVKTLKKDNLRKMPEPSEENNLKKLQKKNSEKSGPLPPPELRNHTSFLQQNYINKTIPSVKIYLSETNEPSAEIKEKIVEMEQYRTDEEVAMFETAISEFGILTEITILELEKQIQLQLNPFLVDKNIVHKALEKELKEMGKRDETEKVKEKYQKQSSFIEDTTDENVGNILNVKISQTDYGYPTIDELVMQMQKRRDISEQLERQKILELQMKLLKAQSEMIKDALHFSISKVIAQYSPIVETMKLESLKMI
PY04180	Py	OG4_48337	-	-	hypothetical protein	hypothetical protein [Plasmodium yoelii yoelii 17XNL]	MTKASYSCMVKCVFIFLFLYQCINNKKSYFINNFMAYKRCGTNNISHKYNNYYCDKLKEDQKNDEDSCLKYKDKNINGYKIKQPINILKAHKIDQKEIKRKKNYQYAMKHMYDKNGRRIKEINKERKSLKKKNIFDYEGFKVNKIFTCLSDEDMEELRDEELKRKSGEILHNNKYIDTYGVESDSNLDQI
PY04202	Py	OG4_27911	-	+	hypothetical protein	plasmodium falciparum cpw-wpc domain containing protein	KVSSPFFLFFFVSIIWLKMSNCYESPRFTSLNTKENKDISKDMEELNAINDELINNEKEDEDDDDEESEGFDGSDFNDLAHESLEQAEEQATIDLENSEIENILDKEIYRIIQERLKKLWYIGKCRRDYSNLCPLGWKISEYDTGLCIPPETYEGQCRSIDFSNSKDVDKELFAWKCEVQWPCINSPKLKIMGKCPFRWTLVGNSLCIAPNDYVGKCSPAMDFSNYDYEHRARWANDCNAEWSSLPKSFIKNGQEIKTSTYGFGGPVEENGHVLKIVH
PY04246	Py	OG4_12106	+	-	hypothetical protein	sec61 beta	MNAAPVIVGGVRTPARRRPNPSGSQASNTNQGRNSGASNTILKIYGDDSPGFKL
PY04297	Py	OG4_37679	-	+	Plasmodium falciparum CPW-WPC domain, putative	pb-fam-5 protein	MIRLFFVLLVTLVCVHKFFFFTCTVHNKNDSKSENILSSNGILKNIVKHSPKISEDEINESTMKIVKKAHEDENKMLEKIGACQKDYTLPCPKYWEQNKIMNNEKIITCTANNEYDGFCEKYQSFTYFSEQDKMNFELSCNVEWECKNLNNICPNGKRDYSEPCPIGFIVQNDNSCKADIKIYDGMCNSDNINFNHMNSSEKNDWSVACGAYWECYKECQSNEIFSNCPKNWKEINKYDCIPNQKYKGPCKGKHNFQYYTKKMKIEFEDICKTKFVCKKNFQKNCQKNYEQDCPIDWVKQNGYCLAPTSFNFCNKKKLSIENLKINDKIKFEKECLVNWECKKNEDDNSFCQMDWSYDCPYNWIKEKHNEKQKYICNFNSSNYNGKCKNIIFENNSSEA…
PY04302	Py	OG4_10917	-	+	porphobilinogen synthase, putative	delta-aminolevulinic acid dehydratase	MKKINEIILSFLFALHFVNCLKSNFRKNAYILHSPNWTNDSKTRFRRWNSQNNNNNSSNLIEDDKSIEDLYNENISSQNALKNFSKDINGNIYIDTNRRERRIKRNKHLLALYNNNNIKASNFIYPLFIHEEDIEKKETKLEGIYTFNYEGIVKEIEECLKLNIHHFMFFPVVREENKSVYCEECYNENSYFCKTITKIKDKFLNDVIIYVDIALDPYNIYGHDGIYDNKNQEIINDISVHTLVKQSLCLAKSGADVLCPSDSMDNRIELIRKNLDYCNFRNVLILSYTCKYASTLYKPFRYILSANISKNFIKNKQSYQHNFNNYIDLNNVDKHIKEGADIIMVKPSLFYLDIIREIKKRIGENINVPIAVYNVSGEYMMIKSYVKYLNENENYENEI…
PY04367	Py	OG4_10790	-	-	small GTP-binding protein	small gtp-binding protein	MFIINWFRDILAHLGLSQKSARILFLGLDNAGKTTLLHMLKDDRVAQHVPTLHPHSEELVVGKIRFKTFDLGGHETARRIWRDYFAAVDAVVFMIDTTDRSRFNEAREELKHLLETEELSNVPFVVLGNKIDKPDAASEDELRQHLNLFSNSTISNIKGRTGVRPVELFMCSVIRRMGYAAAFKWISQFLT
PY04408	Py	OG4_11231	+	-	hypothetical protein	conserved plasmodium protein	MITGNGIIFLGTGSSSSTPKLSHIFKNYKILPEKNRNDFGNSELKKEDFEKVEKFVDDLVCKDLENIDQLNNLYLKKKYPNCSDLKCYSCYDALAENSKNKRNNISVLLKSNNSYVLIDVGKTFRESILFNNDKINFSEINLEAVLITHSHTDAMNGIDDLRDLQEYERVSYEDIYYYRCKKPIDVYLNGVSYDRLRNGFEYIAKERTENRFYSKVAALNFYILKDIKYNSLVNENSENSENKENSENKNVSENNKCINIHSYDKKDEHGFTYTTFENDKKIRFIPFQHGKNYVCVGYIVGNNHKLVYISDCNYVSNSVIEYIKKFSPIDILVIDALYYKSKHYSHFSMYESIQFALLIKPKQVYFVGMSCDVEHNITNLYLQKLLKKYPDISFSLAHD…
PY04436	Py	OG4_13117	-	+	ribosomal protein L21, putative	50s ribosomal protein l21	MFFLQRNIYFYIFWLSVLILCDVMNVGIQGKQINLSKVNNRNAYNLNFIKNLNKYQRNRLNRLNKLNVLISSPAQIKLSELEDNRDRSGKFCVVELCSRLKWVEEGRYYDVFRIKQEENKNINLNRVAFYSNEEGKLSFGTPFLDNVRVNATVIKHFRGNKIYRLKFKAKKNYRRFYGHRQEMSRIYINKIESNNELINEEKRKYNFFKDDPIFYILNRIHNIVRPSLELKYLKRNFIDYLNNFCSWKFETFYKHRGNYKHEKMLRNILKTKKLSKRPEVIEQVKKIEQEKKEKRLNKYDPLEDFDPVANQHMIKEHFYS
PY04437	Py	OG4_27548	-	+	hypothetical protein	hypothetical protein [Plasmodium yoelii yoelii 17XNL]	MIFLALIIIFYINFFEGNGVKISSYLKNAPIILANPIKKRYKRTXLYNNDNENVKINDNYEYDKNDLFEYFAKRTFEEDEKLKEIKKKKKKISVTYIQKLPKKNILLKRWKYDLFEKIKEKMKKDEEMERKTKLSKHKYKLPIDFFKLGDSIKGKIISVQDNLIKLDISCIYLAHLYIKRYFNDKTIIRKKYKIGEYMDVVISYIHKKNNIIQVTNDEEEIKTLHTNLKRLKDVGFFAEEKIEKKNEKKNEKKNDKKMADEDGDEEIKEMLGVEFQKNDQVNDLMYIKEENVKKKKKNITKFKIEDIVDGVVKFINENGAYLDIGCKTLAFLNLGHYNKDPNFFLSNGDKKKNKIKVGDYFKNLKIRKIDXLNNRIEVTPYTMQEEACLRIINQQESIK…
PY04487	Py	OG4_13789	-	-	NUDIX domain	bis(5 -nucleosyl)-tetraphosphatase (diadenosine tetraphosphatase)	MRGDIIRAYGILLCRVLGNIGINTTNNKIKNIEFLFLKASYGNNHWTPPKGLVENNEEGLNTAIRETFEETGINKDKYKLLNFEKTLKYLVNGKPKETTYYLAILLNKDENIILSDEHTDYSWIKSGQSNEYFLSPSLHDLMINAEEYLINNSSLXQ
PY04489	Py	OG4_12390	+	-	Sm protein, putative	u6 snrna-associated sm-like protein lsm2	MLFFTFFQQLAEKNQHITIELKNDLQISGVLHSVDQYLNIKLTNISVNNPEKYPHLLSIKSCFVRGSVVRYVFLPSNEVNVEKLRHMCRQEAKMISDKEKNNPK
PY04492	Py	OG4_35788	+	-	hypothetical protein	conserved Plasmodium protein, unknown function [Plasmodium falciparum 3D7]	MGIKFEFFRFFKLNYYSFYTKKEKIYTFIHTITAYSLVGLTVYLGYSFFNMWNEAVHYSYKHYVRKEKQRKELYEKIRNARDSGLIPHSEVSH
PY04529	Py	OG4_48438	-	-	hypothetical protein	hypothetical protein [Plasmodium yoelii yoelii 17XNL]	MDLLKYYCMSCINACSPEKYVIDQNEIEFPSTNKTEFSPKIWDFYYSTSGNYTMYDRQLHSLDTEINENKYFRRNNNSQNLKNLEKVKVIQDFFLDNENRK
PY04560	Py	OG4_33361	-	+	blood-stage membrane protein Ag-1	16s rrna processing protein	MIKCFGKLRGIIILFSFFLFAEKGVNSLAWNKISKMASSPLIRDIPFLNGYKKNEGKQIYTKRDIPYTETYQYTNQVENKSRKDTKRNLFFFFLKNNTLSHLNKIKVRNKTFSSHHTISNRNIFAKNQKKIITMHAYSSDEKNDINNGSIKNGDIKNGDINNGSIKNGDIKNGDINNGSIKNGDIKNGDIKNGDIKNGDINNGGIKNGDIKNGGIKNGDIKNGDIKNGDINNGGIKNGDIKNGDIKNGDIKNGDINNGSIKNGDIKNGDIKNGDINNGSIKNGDIKNGGIKNGGIKNGGIKNGDIKNGDIKNGGIKNGGIKEISKIDTSQNPIIDKENNILPNEDKEEERNKKRQFLTDTKYYKRSKYSKAGKINIKNNLDNTIYDNNQLFSNIIQNDD…
PY04561	Py	OG4_48144	+	+	hypothetical protein	---NA---	MKSILPFLLILFYTFPFQIAENAEHLSMDEIKNVMKNYILNDSTIFSYFSFLYLYNMLRCTLTQKVFNSYPDQNYEKEILIVKEKLSYLNKNSQNMTQWIFADFKLPQLLLSSIEEIEKKMKTQGINFIQMYNELRMASPTFRNISNLTLEVCYDSIFSVEEFSMQLTILPFILDKLEISDQKYKDEVKYMISKTFKYFSFFISIINDHNNKIIDIYKKEINVFIKVKENFHIKSLNGNNLLSLYDEIYLKNKYGEKLIQNLFVLFKKIFFLESTDDIYYFKYIDVVPIYIKTINGLYKSRKYNMEKNYFTKIENKYKNNLKINEGIILIKTVKQYIIDGYTNNPTYFDSDVIYKTIIQEIHEPIISSKNEDTQFQLLYSENVDETKEKKFINDDVTLS…
PY04576	Py	OG4_25441	-	-	hypothetical protein	ubiquitin fusion degradation protein	MLKKNYITISILTICVFLDTKHVNKNKLSYTLTNSSNFYKYKPYSNILTKIKNYTFKAIYKTKLLTYVNDINNLNLGKEKNEFYLITLPLSEKFNPFSGTFCHDNIQYSDKASLPIFIYDILLNKHIEVPWNFVIEKVDIKKNEIYNKITMPEINMPNNYKNINKVDRIFINVLDFKSKKNFIFLPNYIMKSLQLNCFDVVRLKFVKLETASSVILQPHDKRFFQLNEPKKILEEKLRYYSSLTKNSTICIFHNHFNYYFDVVKIDSEKKKDVEVASIQDADVIFDFVKEKYP
PY04584	Py	OG4_34324	+	-	hypothetical protein	hypothetical protein [Plasmodium yoelii yoelii 17XNL]	MAEPEQSHNNTVNTNLNTQYNVRNLASQTEGAEYKIYEHPASRNVIESSSYQMDTPYYNHGEINTHSINLYNKENYINGNSKLILEPNNSFNVSSLQPQGVEHYDYVNEPISYIDNYGNPVEINNKYIISNDNMKYDINSEIEKTRIYPNIIPQLNSSHMLNLNNNISNADINKYNDSNNTNDIYGYLNNNVSNLNYDYIMKNYDGGLYNNHNNNNHNIGNIIPLNSMQNLSNINELYGINQLDGIDDPNSMDNIKSMPFNLQDNINSYNNEKYIPLPIDNFPYIFNKTPMETDEDDKRYSKLRGIYNVGNVGNVGNIGNIGDLKMNSKKTKCIHNHSKNIDQLQAIVCLQKLEEIPVPFLNINDIKYSINVYFNSYDDILQKYQSKFYNCKLNESDNY…
PY04586	Py	OG4_23238	-	-	hypothetical protein	wd g-beta repeat domain containing protein	MRGYMRNGYRSHSRYATASDGSSKRQGSYNRKNYYSKKPQNKDKGVTFCPHYTIKGSCRYINDCKNLHNLKLVDTFSLQRSYIDCAIIVHGPNNEIYLFASVSPYTINVWMFVPGEDSKEIDIKHLKKIEFQLTEEEEYYGENKLKHNKKSNKKKRVLSLLYAEECIFAGLDNGIIKIMHLPSSDCSTLYAHTDAIHSIVCIDGIIISSSINGEVKFWKYDETHLSFVTIKKIETKTKINKMIEIVSNKCINNINNKSNDINSEESKYNRTLWVCGDSITIINLLNLEIVNNFKCKYGNVVSVIQYEANVITAMSEGKILAYGLSGQEYFEMNTLPIYCMAGLTDNKNIPILIYGSNKSLYTFSLPEFNSYGYIKDREYMSLKFNINDPNFILTLSGPY…
PY04618	Py	OG4_10233	-	+	cysteinyl-tRNA synthetase	cysteinyl-trna synthetase	MKLFKFLCLTLFSIIYRKTLFCSSININSYYNRKNKTTKNISLKNKFNKKGKFSKKGMLFIPKYLHCKNNFIKMEANSNLPKWTMPSKENKTITNLMVNNSLTHSKVEFVPQEGNTIKWYACGPTVYDAAHLGHARTYVSFDIIRRILTNYFKYDVFMVINITDIDDKIIKRSEEEKVNFTELARKWEYEFWEDMKSLNVLLPSSITRVSEYVNEIIKFIEKIIENKYAYVSSEGSVYFDIDAFKKNPNHFYARMEPMSVKDETKILEGEGDLGVISKNKKNSYDFALWKSSKPNEPSWDSPWGKGRPGWHIECSTMASNILGNVLDIHSGGIDLRFPHHDNELAQSEAFFDHSQWVNYFLHSGHLHIEGLKMSKSLKNFITIKSMLKKYTANQIRILF…
PY04629	Py	OG4_54946	-	-	hypothetical protein	lpxtg-domain-containing protein cell wall anchor protein	MNSMHKLFQFENKDDDDIYINAFFRKNIFRKYEFKSKHYDKPKSDVIKNKSGAHFKRVSNNSWYDTSVYNKEKDIYLLCKEMKNENKSINILRSVEKNEEIQQVVNTYENAQNKTNTKNVYNLQIDKYTDIHNNVLKNNPYNSLYMNKKGKNNKLLNIENKIHTDLLIGKPSVDKPSVDKPSVDKPSGDKPSVDKLNVDKPSGDKTNSNIKDCRGGDELEEKNKNIKTEKNILKPKNVIKNNLRLKKENITRTSSAYCDDNIEKDYFKKRWKSNLVNCKILKGKVIQKKWIENINSEFDINNLDELKNKSIFLNNNNNTNKFKNIRCLHLKDKKNNYLDHLINSNYIYNKKHKYFKREKMLFPKIENMVEIENYNLEQGGERKKNLKKNNKINQDFENE…
PY04664	Py	OG4_13743	-	+	ribosomal protein L28, putative	50s ribosomal subunit protein l28	MQIKKNIYNLSINVYIFYILLNLNYLFCFGQSLVINKNEANRINSQNFFFVKSLIKKNLFKNRSFPKHVNSSKFSLYTQKRHKEALAIKKYKMTGTSSAKRHHGIKGKKRISKVTLMPYKDIKLPARRCPILGKMDNRNARKISKSGIKTHKIQRVNFVRKRIYFEEEDRFVKLRVSARGLKTIKKYGLAYCAKKFNLNLNKKKYDAGYSPRKKNKNKNESETLASQNDTLKEPQVENPQDENPQDENPQDENIIIEKLKLNNRNK
PY04671	Py	OG4_30639	-	+	hypothetical protein	hypothetical protein [Plasmodium chabaudi chabaudi]	MDFMRCFVFLFFLIYLKKGVCYYFENKTTTTFPIFGNKSYTENFYKSIKKSKHTKFQVGLIFRKQKDQSMVRSIPSHEKEKEEKKKKKKKDGDEKDDKNKKKVNKKLMRRRLLKFYKLKKKNEETKENXFDQDKKYSVFDYIESKLTNNSSMFVDKVIQNDDKIKIDPISNMANTEELLLFGHKWKFPENSSDLFEKYKDIDENISEGERKENRENDNLKEDEKKKKKKKLKKLKKNMHIGKYHRKVFTYKKKIPVDNVHEYVENKQLKDKYILKKDTLKNVFVNRPLFNFYNFYNFFQIDHIEKYNKSKILNLIYYYIYKYKNNVGSEIKYDHLNEDDIKKFEGISDDKKKMMHYLEFYINMNNNKYQYINIDKNYTLKKKKTDAFTVSNINKVDSLH…
PY04682	Py	OG4_42305	-	+	hypothetical protein	hypothetical protein [Plasmodium yoelii yoelii 17XNL]	MHHFILLLLLFVKYGAYVVCSDPSDDISFENDIDEKWMLHPLETNPFIDLQHPNFKGDFVRSINEYYVFETKEYNAYKKERYNNIKNGIPFEKKQFHCAFNLLLHGRPNSRNADDYRIWSPQITLIKYDAMLKKKYHKYFLYAPYVVITNFVGNEGIHAHANYAFLITNRLSMTFKHLLKDDTCHTYDVFVHAHCVGGNIGRIVFTLDRDIWKTVNLSLIDIQNERTTLAILNHNFKRTLTDVNIITDKSTIKYRSDPYFKKHHHCLYKSFKFVPKKKRLTDYFEEMFSDHNVEYDSLESVNKQLYKKKLSKLKKSKYSSSKRMRNPFKMDEDLTSNIKSDYSEDEDEEISDSTSVFDPNNNSYDNFQYSYQTLDNDDSEDDEEVISLKFVKRLHYYIL…
PY04690	Py	OG4_35778	-	+	hypothetical protein	ctp transferase 1 domain-containing protein	MYPIILFLAIVIVVTILDVCPQIPKFYARKLTHILCGVFILMFDIVINGTRRNESQILGKSQTTNNEYGVYFIYIVAIVSILRCFFYPFRFGEYRDKGIIVYNTIVSLFFFFKLPLYVLTPIFFADPIAAIVGQYFSKLKIYKIKT
PY04719	Py	OG4_30692	-	-	hypothetical protein	hypothetical protein [Plasmodium yoelii yoelii 17XNL]	MKKENLFDLYKIYLNKISSIASLLCLIDCVLIPVLTILLSFFSLVKHYFFNSNSISTLNTENAIHGNVSIDHHGHDSWHIFMEKVALFFMMPIITLTTIINFYKLRNVPLLMSALTGMTLFIISHAHIEFSNDNINDIIETLHIPLALLGATFLLSTNYASHKLLKEKNLDHCCKYDHIKNYHNNNHHHHNHHHHNHHHHNHHHHAANNNRSDLTGDKDEFDNFEKPSDENTDLLSYL
PY04877	Py	OG4_24485	-	+	hypothetical protein	antigen ub05	MGSHIQPSRFLDGAILSLFGMVISASFLYMFSEFYLLAFEAKLFDNKVSMVLNRLFPFK
PY04882	Py	OG4_48466	-	+	hypothetical protein	hypothetical protein [Plasmodium yoelii yoelii 17XNL]	MFFLFLYNIILSLCFASAQTAVVYDENQTSTQFHIILWISITFVVAFLSGIYGIFQVANTKDSLLYSKIGTSNSTN
PY04971	Py	OG4_36196	+	-	cdk-related protein kinase 6-related	a chain crystal structure of cyclin-dependent kinase 2 with inhibitor	MDISNFDFMNVIGKGHMVRVVYKAMDKKENKLVAIKKIINLCDHNYGISKIILRELSILQKINHKNIIVLRNIFYGKDIEQKLVGENLENSCLYLTFEYCDIDLLNFTKIYNLNIKEVKYIIFEILLALCYLHSNNYLHRDIKPENIFINSKGEIKLGDLGLSVEKSDNMTPSVVTIWYRPPELLLKQNNYDQKIDIWSLGCLFVELITGRPLFPGKNDQSQLDLIYTTLGNKTEITMDNIERYNSFPYYEEHILKSTISDESVCDLISKMLIYDPYFRISSKEALKHSCFDDMTKLPPLTI
PY04986	Py	OG4_25099	-	+	250-270 copies of a 13 AA repeat, NSSTPITSSSIL	trap-related protein	MKFFFILVIFSFFSFSFGGKLKKSFLELEAPPPYIFDFCKGMNIHFLISAEEVNSNEFLNHLIYAIMGTVNYMRLSIGNVISVSIFDEKIVYKNIKTIGKIKKHPFAREIEDAYKKYAHYEPKETNLKNSIIDYHENVILSDPVMKNQKNVIIICKAFDKTDLTDYSEETINFIRDKRDQDLGIYFISENTMYSSNMVYKLSETRLDEDGLYPIAHLLSGLYDNRLVISVKKFCYHLTHGSLCNKYNDWSDWSGPCEFRQRRKEIPLNITRTKATKFLRHYIPTCSNTFDYSISVKEDFKIDCSNIIYDCRGTCDAGYKFKPFVADNEIVERYVECTDLPPCTEEQRKSRDKYEYKKIIKDLNDEAEQKEYQDTIERKVIEKIREGETEAQANARKIKA…
PY05032	Py	OG4_40800	-	+	hypothetical protein	nadh-cytochrome b5 reductase	MNNINKEKRLLILITRINMLVNLLQTRLAYPLIYPFNTSALNNDKSLKLYFEKLKKDGNFNEEAFMKSLGFITPAIISLTKLVNILKAGYSLCNYSGMTSKLTYINRKNNKNILTQYEKKLHFLKPQIWRLLKPNDEMATKHLKWRK
PY05052	Py	OG4_23356	+	-	hypothetical protein	hypothetical protein [Plasmodium berghei strain ANKA]	MAKGLRSKVKRRFRTVKRVHVHETIEKQNIANLNKRIKDMLQNKNVYKDFIKPPNKFLHPDDENAVIPQHKIAKSXDFRSEALPLSGFAMIGNRRKYDLEEKMEIKNQYGNNLGLYDNAEISKLIEDMHKRSKEVMKTLQTNKAE
PY05100	Py	OG4_10789	+	-	hypothetical protein	hydroxyacyl glutathione hydrolase	MKPCAQVLVVPSLEDNFAYVIIDEKTKKAACFDPVEPDKILKKIENLNVDLEYAFCTHHHYDHSGGNIRIKELHKKIKVIGSAYETTPGATEKAYDSQIIRLGEICIKAIHAPCHTKGHMMYYAYKMDENKNEDLTCAPILFTGDTLFIAGCGRFFEGGAKEMFKNIEKAKTLRGETLIYCGHEYTLNNLRFALSIEKENEDMINKMKEVEELLKKKKHSVPSTIKDETLINPFFRTNFYIEKYNTQDEVKILNKLRELKNYF
PY05106	Py	OG4_54908	-	-	hypothetical protein	hypothetical protein [Plasmodium yoelii yoelii 17XNL]	MKKIFLSNLEKQTQTDNLIVNVHLNQTSNPKDEYEQVYTNSKDIFKSPKMSISSIETIYPYFVSEKKGEKKEVEKEGEKEGEKKEVEKEGEKKEVEKEGEKGGGDHFLKIKSNSNVNKICRQLMVNNDTNLFSKCDTNLFSKSDSNTFSKSDRNTFSKSDSNTFSKSEHFPDLKKNNKYDINYVDENKYNDYLSGHLTQIDVKQNSEIKIKDVKMNQTHEITPLDKVVESNCFEKKAEACEKSEKKAEACEKWEKKAEACGDDSKRVGNLCNVQSNIQNDDHKESIVTNNNNSLVYNEQDVNGEFGENYKSSLLMEDKKKVIINDIKNDNNIPENFNYLYDILEKKYKENINLDGSEYVYIYDICPKNDKYNSDKICYYVSNSDKSREVDSNNLEHYQN…
PY05180	Py	OG4_23349	-	+	MAC/Perforin domain, putative	perforin-like protein 1	MMFKRKYLFFPCFFLIIVNILHKFDNLGTDESLLYFHIRILSMNKNDTQELYNNKVKISNNEILLGLQHEHNIEDDRIIKFVSNDANSKHGRRIKNVTFKLPNNIVDRMQNIRKINFNEMKQNNDANLEINKPSTTHETYSALESSTHNKKTSNVKSKVNNFVKLMKDINDNMESEKEKESHNPNKENVYNDEHHTVVIYDGLDENKDLYNKYKIERENNMDTRVIQGTEYLGVGYDFLFGNPIGDPFLKVDPGYRDSVIKLTYPKSDGDYXDNYININPNGSYVRNEISCNRSENETEISTMSEYSKELSVDASLGASYGLFGSFSASVGYTSASNTISKKKFRMFILKSYCFKYVASLSQYSQWKLSDQFLRAIDLLPSYFNSLEHDGKYCNAEELR…
PY05194	Py	OG4_42792	+	-	hypothetical protein	conserved plasmodium membrane protein	MGFFYSIXXALMKYITNKLNYSRQQKIFVINNCLFFSFILFXISYYFFFNGLIYPAVKIVFHGSVIANQTIVYKNSILESIWLLYTSGSYFNMGVLLIFSVIIPVLKFIMVSDNFYSFFKLYNLSLNINENDKDDAKLIYYINIINENEEFALKKFSILSSISRFQFVDVFISLFIVSSLNLYLLEAKILIGAYHFLNYCILSTISSYLLLTFIKIKINIFKDGNIRIFSSRDENIANGKNTDXIIYNDNKELNNIXNNNNTKENHKWNKKNKKKKKNSKENFDGLNSENINNESENEDKIGNINNKYKIDGNENKSLEEDTSAGKTTGDEHMTSNKENECEEIDSIDCENIAEKNSYENNILCYNKLQSLNSVSYLYKIMKNNDAYIYLKKKKFNLLL…
PY05311	Py	OG4_21637	-	+	hypothetical protein	hydrophilic surface protein	MKISNLVVLYIQFFFFCKSDDIPFQSSENLLNTSLMYVIHNNFNVNGIMKIIEKMFKNNMDDIEMEDNSEIQNLKIKEYNIDSNKYKLTYLSFKEYCLNEVENGEDCMDYMEKDVTEIGNKIDNKFYSKYFKEINLLKHNLNELANLLKGLNELNNEIFYFFENVIDSKNIINNSMTNKSKRALPLINHFEELVYNLKNADNSFSFHNMLMQFGDELNIIIKNALVEYVYLHKQAKEHMKQLEKYMEKNVKMLTKMHKKIVLSIFYIASDINKTNDKIDFLINKNLNEFKEWVINENKKCTDKLKKIKSNIDFNFENINEVFDNSKEKLKDDYISFIDISKYLSFQNPNKTILSIIHFLNNKYSDDVDIIFLYNEEYVEFNVNEITYENDMSKNNDKSE…
PY05332	Py	OG4_43332	+	+	hypothetical protein	hexose transporter	MMYLTKIVSNACLAIINFGLCLSLTSLSRRMLIKGYDICPDGYRGCDKEKWYFSTFYFTLYMSAFLGCFISLFFRNINRKKFMQVIHYLYIIGSLFTIYYEPHVILFLFSQASFFGLAIGCTIVIVGFYVFEYSPKEHQNYYGFTIQTFFSIGLLISYLFGVIYEHMKFNKITSSYWILMILQKLHMLMPLIFSIISILLLNFVFTMDTPLHLYKSQKYDKFEEIKKKISKVGIDEKHEYHSNEKNNEINIILNDLTIIDFFRNKKLRTNCIIGSILCYLFCFSGCIIIFNNLFLFYNIFETKRESSIISMIFIFIYFLFTIITTKLANYYNNKNKLIILGFVLQLISSFIMMICSLCNLPQVLNKIIISIDIILYIIGFSFGFGHIIWTHIFHIFSKN…
PY05452	Py	OG4_12953	+	-	hypothetical protein	macrophage migration inhibitory factor	MPCCELITNISIPDDKAQNALSEIEDAISNVLGKPVAYIMSNYDYQKNLRFSGSNEGYCFVRLTSIGGINRSNNSSLADKITKILSNHLGVKPRRVYIEFRDCSAQNFAFSGSLFG
PY05528	Py	OG4_48007	-	+	hypothetical protein	hypothetical protein [Plasmodium yoelii yoelii 17XNL]	MNILSLCISFFILIQLLNNSGMFSCLSNVDKNGNILLLKDMKTGNTKETLQNELINKIKKKANNIRMLYNILNEKNISKPIYIFINDQNEKKKKFLKDLYLLGKLDFLQGFNTPISKYYISLKNKTISYRMLLGDKINNERKYINGLNSEDKDIYGNI
PY05737	Py	OG4_24215	-	+	hypothetical protein	blastula protease-10	MCAKKRIESEYRINKIFITNILLLNLIFIWTLGYFTNDIPVTLHNDEIVIKNKFNLQGIRILASHFEDETHDNNNNNKSTVAEEYDDPLCSFYKTNPKTKERINMRKISFMKNIYPNIDNDTDSSESKFLELRNKALAPIEKRNKALLEAHNTLLNFSNYVSDMRSYGLKIEEVKKNIDSFRNSCESQILGIKTLLSSYIDSCGTQIKEVGNYIVERYDFTNNLPEENKYKDTQDDLRVNSIYSKYYSDENNSKLNDDNSSLEDTKNSETYYDENCGAYVDENKKVYDYTYKREYDNGYTYKRECDNGYTYKRECDNGYTYKRECDNGYTYKRECDNDYTYKRECDNDYTYKRECDNGYTYKRECDNDYTYKRECDNDYTYKRECDNDYTYKRECDNDY…
PY05738	Py	OG4_25190	-	+	hypothetical protein	rhoptry neck protein 6	MYYYFFVLFAISVNGLLRNKDANIFASSNDGIIGDDNSMNTFGMSENGSLYLNEEPSESFLENCNINSCVDIGQPNGNKINTQEDGSKINTQEDGSKINIQEDGNKINTQEDGNKINIQEGGNKINIQENGNNNSNADLKKKTEDIIDVVHTQREPLQTAEKEEIKNDVKLKENSTNLKKNKDADEMDDDMDDENLDTSVEDEYNDNEDEDDDFESDDDKEDDEKENQKQNQKEKEKHSEEQSEQNEEQNEEQNEEQNEEQNEEQNEEQNEKLYKQIIIDNDKETEISGNKNTKENILGANPENKMEMSDEGSNPQLPKFRIHTEKNNIKIKNERNKIGNKYNIEFNNKNANQMGNTENRKMGNRINNRLDISNNKKISYEMQNIQNDNQHAGKFEDGK…
PY05754	Py	OG4_10475	+	-	ribosomal protein S23	40s ribosomal protein s23	MGSGKPSGLRSARKLRIRRRTQRWADKGYKKSHLGTRWKSNPFRGSSHAKGIVVEKVAIEAKQPNSAYRKCVRVQLIKNGKKITAFVPGDGCLNFIDENDEVLVSGFGRSGHSVGDLPGVKFKVVKVARVSLLALFKEKKEKPRS
PY05787	Py	OG4_11854	-	-	putative cell division cycle ATPase	cell division cycle atpase	MKGNKMCYSLFFFKEHIKRYILTIFIIFIVKYSNQIKLAQNGNIITATYNNGKKNKYLFWGNNGSRNIFGKTIKRRNPFASIGTMFKENRINKNKKKQNDMFGQFAIVETDNETNKKNTDNEYNTKDCDITNKDLKLKDSEKLKFINDENIKYEKKHNQKVINTLKEEANLTDEKEVNLTDEKEVNLTDKNEVNLTDKNEVYLTDEKEANDSIFLNNKINDTMSKKENNSKSIINSFFQNIWGNSNTPKSRDQKNGGDKNGGDKNGGDKNGGDKNGGDKNGGDKNGGGQNGGGQNEKERPNGGGQSEGGPNGGSENETNFLLKALNSGKFPNYCLVENIDENADNFDIYMSKEKMRELNINDGFTVLLKGKKKKEMVAIAREDNRLSKYSVSISFSIKR…
PY05891	Py	OG4_11679	-	-	probable RNA 3'-terminal phosphate cyclase-like protein	rna 3 -terminal phosphate cyclase-like	MEFGGSNYFRFRLALSLISGKEITIKNIRKKNSHKKTSKDEEIDDNEINEGLQEYEAKILKLIDKLCDDTIIKINEDGDELYFKPGFLIGNVNDEVKISDLNNTFHCGNERSISYFLEFLIMIVPFFKNPVKLLLKGITDDQIDRTVYTCKIVCENFFKTFLNVNDDFLNITILKRGTKLDATGEVSFFMNNLKMVNSFDMHDAGLVKKITGTIVCNKMSMIFRNKIVNCAKKNLHNFTPYVSIEVEKEKKNNYTNKNNSQNNFMSLSLFAQTKNKCIYGTDLYVDKFMLQHVKDMLNSRTEDNLSMQLGEHKWDEGQVDENDEEKEEEEVEEDEEEEEKDDEEEEEDENEEEDENEEDENEEVEEDDENEEEEDEDENEEEEDEDEEVEEDDENEEEE…
PY06016	Py	OG4_25537	-	-	hypothetical protein	conserved plasmodium membrane protein	MAGQSEKKRLKKAANFIIYAYPFFSIFSIIYIIFAYFFRYDLITRNIFFLHCLLFFCYYYSIKNIHYGLTNGLNFTYYTDVLILSFVINIGLFFSFKFFYIYIIIPIYATFKFINFIVKFFLGSPMSAIAPPENAEQPEKKKQKIVYKKVY
PY06066	Py	OG4_10246	+	-	V-type ATPase, C subunit, putative	vacuolar atp synthase 16 kda proteolipid	MRTCDPNSAFFGFMGIAASSIFSNLGAAFGTAKSGVGVCSVGVMRPDLIMKSILPVVMAGVLGIYGIIMSIIISGKMSPAASYSSFLGYTHLASGLIVGLSSLAAGLAIGIVGDAGVRANAQQNRLFIGMILILVFSETLALYGNFFL
PY06105	Py	OG4_11889	-	+	Arabidopsis thaliana T27G7.17, putative	cysteine desulfurase	MNNKSICILLLLFLKITGYYSYYISPLKKNIYTHPIYKRHILKLQNEKPEIDSNIINYFKNIRSDFPFFQQNNSPIYFDNAATTHKPASVIEKIKNFYSYNNSNIHRGIYKISRNAXDNYENVRIIVQKYINCDSSDEIIFTSGATYGINLVCNIIMDKIIKNENDEIYISYLEHNSNIIPWQENIRNKKKGKLKYIPLKKNGYINIKKFVEKINNNTKIVSINHVSNVLGNIQNINLIIKKIKKKNPNIIVIIDAAQSFPHLKYDIKKMKLKNEDPDILITSGHKFCAPFGSGFVYIKKKITHASKTNPFLYGSNIITDVNKYRSKFVSSPHIFETGTQNISAILAMGEAIKYLQKINDEGNAYKYEMYLYDLFLFYLRSFLTHHLVELPNIPTKLDE…
PY06123	Py	OG4_44949	-	+	hypothetical protein	conserved plasmodium protein	MSWLSVIFSYFIIAFFMIQYALPKEGIFKARMINPFHHKANKKRIMNHIGALYYLINEIKTNVEDLSNGYNNFIKAVNSSKEREERLINMNDLKTGEFINKMEKLKKYYNKFKDTSAENIENNKNEFYQSLKNKMKELFPNSIAELRGISKYIKYINVSTINLNKIITNIFSKTMHLCDVYEENINYIYQVGKEYYKDKLNKLSNSLIHEYNEYNKTLNIFSNEKYINNFSDTFYLELLKKKLNDSKDKIVMMDVSSILEQHTFYELSHFFNIFLKNYNKGFIIYVINRINVNYYNNKIILIESQKLLKLIKFIKKNYNHLKIDYIVIHIFNMYISVFINSNEILYHVNYDFFYDGQLLNAYNTYNYGYFFTNQKINYEEFNKNDDHIYVFYVGNRIVN…
PY06150	Py	OG4_64889	-	+	hypothetical protein	pb-fam-3 protein	MRVSILKFVFFSIIICFFKYAKNTFKETIKIDYIYVNKYLIYLQELYFINERNIYHERNIIQLRSIRILADVDNQFDLNDFYQSTLSLANQFNDYDNDDEEMISIRNIIDSHIKKHKENNTLPDLNNVDKRTKKLIHGLHKEIEEFKKELDNKGDNELAIQPIHDKIIIKKDENSSVSEHEDFKQLKNSENILEINDDKFDDKYYEIKTSNNYKKFKINENIKKDKEKPLKKLLMVSFTILLAMIVSGTIKLLLILAPLGALIFRSWRKVRKYSFKL
PY06175	Py	OG4_37696	+	-	hypothetical protein	hypothetical protein [Plasmodium berghei strain ANKA]	MEKFSWRCIRIVKWKQNVLKREFSKYSSTQKVHNNSGNNNGNNSGNNNGNNSGNNNGNNSGNNNGNNSGNNNGNDNANPMVKQNIKPFSDTHTYSDIDSNSKQIIERYQNLIKEANKNQEGGEKAQKKEDRFPQNLVSKYNGQNNGQNKVKDMDKVNDMNKVKDDNTNLTPNKDEKYIILKKQITKEFIHKVFLPHVESQIIYHIKTYTPDQIVNIFHIYSYLYYFDKKKEIVDQLLEYLKYRLDCFSVNNIVLVLEPLYNIKKINNIYIYRLIINYINKISDKFNLYNYIGISRIFTKILIDLYAQENSTTNTKIVLTNLLKYIRHSKYRKELPLNQKNISHKIFIIQFMNQIIDRIDSQLHLLSAIELTDMLTVISNYSFKNDYSKYYIPKELAKNN…
PY06178	Py	OG4_48395	-	+	hypothetical protein	hypothetical protein [Plasmodium berghei strain ANKA]	MKAAYSRLYFFFYFVIVFFKSVTYCLNDISKFEKLKKLINKKIKLDINEEYEKDKTQNEIPFHYIHLSLSDYVDYVLNKDEEYDCVLFLIDVEIKNNLSMFDRKTYILLELFNNIAKKIILENIFLYNVNDYKKGNTNIYMKNKLLKPIFFFYVNLNKPHLNPLKHIHMIQNYPEFVYMNEYTLYNHKHYLPIHNIYMLENYIKKEEKKKHWKKQDVLNDDKIQIELNIENITNYFLKFIYMHNINRYTVNLNKSQEEEEEEEDELCLCYYIYLF
PY06194	Py	OG4_41248	-	+	hypothetical protein	hypothetical protein [Plasmodium yoelii yoelii 17XNL]	MKIGKIMLFPIYILLIYVFLCKCKKIKKNKKLGNLMKSLTERIESNEGENEYARLTQAPTINMKLSKVNFKTTLQNILVESYSEKVKELISKLNYEISKEKTILDDIKNSNYNLNKLNNLISVKSKKNDKFHDDKIKNIYHNYLNDNNESFGLSLFPVYKTFKSNPSHFNNILRNSLLPDELIKDGFLPNQNFLKNSSKNVLFPERGDFELEM
PY06247	Py	OG4_42707	-	+	hypothetical protein	conserved Plasmodium protein, unknown function [Plasmodium falciparum 3D7]	MIIKFLIIFSFLHFISCEKFNGIHDPANSRFLQSKINVLTWLTNVIYPSETPKYFKKYLDYKGCREYFLKPSYDPIDLNKQWLQTNNWKANNEDAIIEYSGKESCRESVRIY
PY06248	Py	OG4_64950	-	+	hypothetical protein	hypothetical protein [Plasmodium yoelii yoelii 17XNL]	MKIIIIFCFILIIFKHVIISKGLNDIPLINYEMVPSQRWKVASTELAKLKEKLKLFITSEIQKEESNLIRKYYREFLLPDDDNMNNFESELVSTKKGDISDLLEDGEIETKIQEKVSFDTNGPILLT
PY06259	Py	OG4_13519	-	+	histone deacetylase/AcuC/AphA family protein, putative	histone deacetylase family protein	MYWFYFVILFMLFEFVWITLELKQKYPNKRIIEISNFINFIEQTKKNYNSRIFQNVEKKKIEKLIDLHTEQFAHKCVKNEINKKYYPLCNKRNEKVNEIDEKIWDYPNHVSCDNELLFLDIQKEVFKICENSFNEKIYENIFKNQKKYCNNSKNPPYVFHPIYSNAERKVNKSNRHIQTHRFKINKYENIFNYLNKREECIYENNYIIPSCDISKIKKSLFSIHSTNFINKMFNIIKNNEEIKLYELNLFSDLIARYLIEINGTILSSLLALKHSMCMHIGGGNHHSKRDKGDGFCIFNDIAIAVDFLLFYKIVKNVIILDVDVHQGDGTAEIFQNHQNVKTISLHCKNNYPFLKKKSTIDIELNSYMEDNEYLKIYQNILNNIKPQKNSIIFYLAGVD…
PY06418	Py	OG4_14813	-	-	hypothetical protein	conserved plasmodium membrane protein	MDIYRMIKKIYNSNITNSLISSICGTLASAFFKKASDISILKKNYHLINITWIIEFLLRLIYFFLFIIFNLLMIKYYIILMKHYSAFLATIFNFSFNFFLTAIFGTLFFHEQRNAYWILGGAFIITGLILIMSDSINKENKSE
PY06419	Py	OG4_23343	-	-	hypothetical protein	conserved plasmodium membrane protein	MRILNYICGRSLRSSGAAPLIYNPIKKLLIILALLYICLSALSCGIFLFPKASDLHCSPLVDSLFNFYLSMGASNVMAPYYSMISCREWGTENEWVVVAIVSAVMAIIDVSSSFYGIYVLYTIIDIVFTNITGMNECTCYKSIFFFSANAFLVVLHFIVAITSIVVYYMLMKNIDKQLEDNRNI
PY06424	Py	OG4_11947	+	-	hypothetical protein	prefoldin	MADVKDSKYDLGLDMTKDDQKKIGKFTNLHYKQSLYQQKIKLMKEKISNIDSAIDEVSLVFDPNDVMLGIGDCFFSFDTEYVEESLEKSKNEEKVNLNKLECEYKNITDEKQKLKTELYAKFGNRIDLN
PY06430	Py	OG4_15900	-	+	ATP-dependent Clp protease, ATPase subunit-related	atp-dependent clp protease	MKDYHILIVIFMILRFVLNIKISKKVSFLNNTYNLNKYNEFKIKRNKYIKIYNSKNDKTNKFLFDEYDENCIKALIMAREVAKNNNENEVLLKHLLVAIIKTDSHIIDHIFKYFNISLQHFINKFNTEIAKNSFKKTGQEPYDNNHIPPEQIEFQKCSTKNNDQEKTLINNIIGNKIKDEEYNHIVTNNLDKEATKNNDTEASKNNSTESTKDNSTEATNNENCESEHVTDVSSSYNKMQENGIDTKLAAHEKDEKQNDEKQNEKQNDEPFLVNDNSGKRNNQKELKSNKEIKFSENCKLVLQNAILEAKKKNKIFVNLTDILISIINIAQENKECDFVKYLNELNISLSDLKKQVTNYDENNLNSNLIHCPINKNPIKNDEEQDGNKNLNNYSDKQNK…
PY06466	Py	OG4_39404	-	+	hypothetical protein	nucleoside-diphosphatase mig-23	MKNEAIKKLNRLIFVMIIYSLLIYMIIIAKCEHNILTKYDEKEYDEKTKYKSIIIDAGSTGTRVYIYDYITSNDNKDIKIYIPSINYRTTPGLVYLLNNYFFNNEKEGFYNYFQKIQNFIYENVKKEERSSTVILIRASGGFRLLSINQSNKYINFIKNYFFEKFNDFLLIDELLIKILSGKEEAILSYVSIYSLLEKLSPNPIIFINNNNEEIKNSQKLTHNQINNDNKNDDDDIIGVLESGGATAQIIIKVPESKMNKDILNSMNYKHKENNKDDVIEENYKNKNIVKIKLFDKNMYLYCKSYLSLGRQNAMKTYLHYVVHEYYEKKNILSKQNKQNKNDTTNYDDDNNQTKFITVPCFPKEFKFLINNLYKTSIDEELEEYNEQNKRELKNDEYIG…
PY06546	Py	OG4_35952	-	+	transport protein-related	transport protein	MIKFVNIYIFLLVFYIILNKRAHIKCKEEKIVNKLNNRFIIKNGNRSYRQKYRQKYRQKHRQKYRQNYRQNYRQNEGRLYFENDKNCKRKKKIFFIEMQVNKIKRDKWLYNKNKDLFFGNKISSNKLKTCKFIYSNKMWRIYSNVFDINKQVNKLFKGIDKRYIIGSKFLLKIRRCILDDNMLNFIWICKNYLLEKKIFFLTIITMLSSGIISIIVPIYDNILFNNLTNKIFDNFILNLFNCVIIRIISLGLCLLRNWIFIRVNYFSLKKVKNILFKIYINKXYDYFDKVDHNSVINRLTLEAYEFSNIIAYYINPFIRNLFSIILNFSYLFYLNKNLTKKIFIFFCISSVLTIISYKLKRKGLXHINKEKNKNSSISLESINNISVIKLFSTESHEHN…
PY06586	Py	OG4_39681	-	+	hypothetical protein	patatin-like phospholipase	MTKNVYILFVYIVYVFLHMFSSSLRMQKNLFKYITPISKKINLTRIKKIKIFRKERKQKNIHVFNDAVNKYIGISTSQDKLNYINMLQKIIEDKKCEYFLFSNNYMRIIIYILNERFLMIKKNEYKNDATEYQIIYKLLLIFNNLTKYRNFYHVILNDYTHKNVKISLIYIIMNILNEKRNKETHKEANSVFDYFTSFFKNPDETTKKYIDQDNNITDEQIKRENDIKKKNGIDDIKNKIFHLGKNILLKVKEEKLKIENKLNEQYNNNNDNILKDQQYTKRQLEYYQLGQNDISLSKENKNENPDDNKMIRDDHTNNSYYFNNNIDNYHDKNIYKGYTNSTSQLNYFNEDLKNIDNIIYDNKKDKQNNNENYMKNLLKYYNNDDNEQMKSDQTNESTY…
PY06618	Py	OG4_41739	+	-	hypothetical protein	conserved plasmodium membrane protein	MTKQLTKEYYSYFSESRKKTLMVEKDIKTRTIFLIKENLKHIFVLDNVDATVGLSLMNVTIFLLGGLTNNTINVCISTYLQGMIFILSLLCYIIQTNFQKSIISDIFFVILLXVSCIFPFLSIKLNGGFNSIIFFPISIMLLFSKYHLRNLFLLELGLILKILILVMAINVNEINIYIILLLLSCFFFSILFYRYLYFFSKTVSISFSTPKNLMMMFPYINEYQEICLLKLADIIIDINNYMDVKLNIFCHDIPQINLTKEKNNFENLQMNISRIINKFYTLKNQKIFLNFPPYYCLKALYYKKLNLMTLYIEKKKKKIKKKYSNSHNTHLYFLLELSKKMNNSFIYYDIPYNHSPPHLPLKNGDTKECDPVVKSGKEKEDIIRNDKKKNIIINYKKKD…
PY06628	Py	OG4_54935	-	+	hypothetical protein	conserved plasmodium protein	MSIFYVIYIIMTPFFMKGYICTMKNYNSERNFFTRKFYSDQFIQIFHKDDYHFFRLVFLKILVSSGFLTKTVTIDVIVKKLDNLVFGINQKNNNTYLKIYEEIKNITLIEYKQIYEKNEIDIKIANEIEKEVAKEIAYNNELQNEKNKDKQVNKMYRNKRDMLSFIPFTKIKKFYYHNNNTSIHLFLEILYISIISSHQSLDDFKKKEMILMVYENTVNQWLVINFIRKIIKHKVSINTGSILL
PY06728	Py	OG4_15045	-	+	Predicted nucleotidyltransferase, putative	nicotinate-nucleotide adenylyltransferase	MVYYLLYVLFMLYNFFVPVCYSNMNKKICIYGGSFDPVTYGHEMVLSKISNLKWVDEIWVVICRCRYDKNLEAFEHRNNMFSIMLENNKYPMEKNKIFVKDLESENTTATYDLLNMLKKTYPQYEFYFIIGSDLLNDLTSWDSGEQLVSENNFVVIERGDFDINKDILKKMFKYYLIEIPVKSFVNYISSTDVRKLLVKQNNEDLKKYINSIAIDYINDNNLYKSCGK
PY06776	Py	OG4_22398	-	+	hypothetical protein	hypothetical membrane conserved in plasmodium species	MLKLYPLILLCIFFKYPISILIENILENNEKLIELDLHNHKWYNRVLIEDNNEVFDIEQLKKLLYFQSKLDKQIRKKQNEEKNSENSANLDKSANLDKSANLDKSANLDKSANLDKSANLDKSANLDKSANLDKSENLDKSENSFKFFGNVENDAVNNETTKTFFNDTTKRDDEKASANNQLDDHNHDKISKINDENLTEQNQNVSGDEKEDKSKSDQSLSNKKSDKIITPHDFSNNSSNSENNRHENNSNENYPSTENNNKENNNKENNNKENNNKENNNKENNTKENNNKANNNEIYKKFELLKNHFQSNDNKTITPKNGEEDKNMINNSMDNSNYSLRKSDIKELIGINDIVKYIKNLLGIKSNIHEKFEHENLIIRNCNYDSFGPEFCSANEEAK…
PY06814	Py	OG4_41653	-	+	hypothetical protein	extracellular membrane associated protein with a signal an egf domain followed by 10 transmembrane domains	MACVMYFFLVYMVGWAFTFVSNALNFCNYGEYFKNNKCYECGENKYSNFKNAESCFSCPPSSYNNKRASKFIHSCSCDSNYYLNYIGNKCDKCSDINSYFFCENNFNELYVDNVEYFLKHTNEINFKNYDRCSTKKDIKNIYPFMNNIFIYCKSPGVCLDTCGKCSENNEGFICNNCKENYYKNIYLKYSTCKECYNTITSIIIIIIYCFVFLIFLMTLFKYINVSLYFYHLNIYKKETIYFLHYFREFMFYLSLIFLLSFSNDLIENEQENYISNEHQNKKQKAYLQYGDLANVHYVLNIYLHNLFFDIIKVIHLNFLNYANIDCLYFLKANSKLHTIEITVFIFFMVLFVCLTLLCNFIFLYLRRNIQKYARNIGINIINLSSSLDHCSGREDIDSV…
PY06848	Py	OG4_42827	-	+	asparagine-rich protein	conserved plasmodium protein	MKKGLLCILVIFPIFSLCLKIKSEIMFLFFIPSLHKQNGNNNIIKIPVKNYKIKQISHHYLFNQNINDTNLYMSNCVNAKKNKINNLHFLITSPEAAKIYRFVIILLIYYIKKYIIQNDDTKNCISIKNKDKNNINLINKLVNIPIISIGISTNYIINNKLKKNDFYNIYKNMSLENKKIYDINNYEFNKINKSLKNFNIVFTPSISNADTLKRELFLYYFQKQIKLFDLKHSNNLVDNNLTDNNLIDNNLIDNNLIDNNLIGVVWVSSAISMSNFEDIKKWNIEKKQNSNIKNVNVMRINCYDTKSINYSKKKLKKIKIKKNSIVCLMSNSAVLSFYQNFGNNFNYAYFVLFFFFFFCTHLASQIT
PY06896	Py	OG4_16178	+	-	glutamine cyclotransferase	glutamine cyclotransferase	MANKLVARKKIATHIIRENSLVKKKRSLKRVVILVIIICMLIAATVLLILHFVLNGNSNYPIDIGIYSYEIINKYNHIHDPIIGKQANVDSIIHQRYINNHPFTQGLLYIDGNTLIESSGLYAVSYLRKFKLNTGATERYYNLTNNYFAEGIALVVEPETYRKFIFVLTYKENTILVFDYNTFELYNTFEHDLNGYGLTSNLDPIHSIEDLKNGKFANYQKLWTTSGSEFLYELEIPNNFKKTNKINIIXKKKVTCAGFTIKHINELEYHLQEKTIYANIFMTNLVIEIDISRGSCLKIINLSGLIDQNTNK
PY06949	Py	OG4_11296	-	+	hypothetical protein	phosphatidylinositol synthase	MQNKNVYLYVPNIIGYIRIILALIAFIVCKKNLAIFTLFYGTSQLLDALDGWTARKFNQ
PY06957	Py	OG4_10236	-	-	threonyl-tRNA synthetase, putative	threonyl-trna	MKIIIMPICIWISNIFFYNLNNLMFVRSVKKNKNIFSNNLRRKHINFYLPQNIHSYSYIGKTNFPILYKNKKIFSKRYHNCLSLKLERTENQQNQQNKQNRQNQQSQQSRQNQQSRQNQQSQQNQQSQQSQQSQQSQQSQQSQQKRNIFSVENKKMSTLNFDNNNLEIQKKNFVIQEDPDFIQYRLNKYNELKEKKKKILEKVIENDPNYYKEINIELLDGSIKTGQKNITTPYQIASQISKKLSENSIVAEIIYLDNVNLNLCDIEDDENDETNVDQSQEGILWDMNVPLIGNCKIKFLGIETPQGKKIFWHSSAHILGSSLEKLYGGYLTIGPALNEGFYYDIYLGNNSIISENYNKIENEYNKLVKENVEFEKMICTKEEVLELFKYNPFKIELIK…
PY07078	Py	OG4_11238	+	-	hypothetical protein	geranylgeranyl transferase type-2 subunit beta	MIFLEEKHIKYLNSYTTVTNVEELLFNETLKMCGVFYFICSCEILSHEIDKKEELINFILKCQNTDGGFGNNINYDSHIVSTHYAILSLLILNYSFDTVNTYIYKDENKLNDIDKANCKDEKREIDLNYGNLVSDQFNNISNDTNHKINKNIQNEQTIREMTSQYILTLLNTDGSVRGDIWGEVDTRFVYSAVSCLTILNKIHLISIEKISSYLLTNYSICGNSFSWTHGNEYHAASVFCCIATLALIQKLYLINEEKVAHWLSLRQTNNGGFNGRAEKLTDTCYSWWIFSSLIILKKYKWINKNSLKKYILLCQDINSGGISDNPDCLPDICHTFFGLAALSLIDNIGDSEKQFNLKKMHPVYAIPIDTVKKRNLPSFGIDTL
PY07092	Py	OG4_47550	-	+	hypothetical protein	sporozoite stage tsp1 domain s21	MFITISRYLFLLFLIKSCLNIFPQYNDTFLEPGPHQNKIINNQALNNQALNNQALNNRALNGRVLNENVLNNCDGWTEWSQCSKTCDIGIKMRVRISSNPIYSLLCSKYTETSVCFIQECPDHSEMRNRDEREKRKNKKKKMLSKY
PY07117	Py	OG4_34299	-	+	hypothetical protein	hypothetical protein [Plasmodium yoelii yoelii 17XNL]	MFLIQIWKIHRIFLIFFLCTRIFEIVCYSKHISRSPHFIINPPKREYLNFINKTSHNIKDIIKKKKHKKLYSIKISNSLDNNIPDEYLKYNIPQEPIYPFITVPDNLYTRKWNGSNDSEEERTDDENDENDGNDENGENDENDENSERSIGKKKVENSNKEKESTNPTIEDYISDINYEKYIHPSLIKSIDKDDRSNIPYDLQKYMNKDQKIYQVDCFCECDMEDDLTEYDAHFNGIGPWPSFYELKKNNNNYEFKKTDMEIEYNISYDKKEYFEYKKKMLTENKTKCDNGNGNDNDNGNGNGNNNNDNNNDNNNNNNEEESETLPTTVDEVRELYYKKEVKTIKEAKYEFQKWNERSKYSRKNWRLTKEEFELLPYETQQLYLKLRKGYKKKNDEIIE…
PY07176	Py	OG4_11602	-	+	OGG1 protein type 2e-related	n-glycosylase dna	MNVYCIFLILIIKKIYAYRSYILKKEGGIKMGYRVKIDRETKLSRRNKKCSNIASSNIMKNKTAAANRMISQPIEEENDLRRKKNKINKMNKMNKTNNTNNTNNTNNTNNTNNTNNTNKITNKIEIKKEVQYDTPPKLINNYNSKNLNSDKISKSFTNLIKNYKNNWRILNVTPNDLQLKYCLLIGQEFHFKQVENDSYIGMVNKKIYLFKETCDKILYQCILDTNRKANNANMEHCNDSKKENNDIDIYEFFNLSFPLEDQIKEWIKKDKRMEEVSNKIKGLRILKNDSVESFFSFLCSTNNNIPRITLMIDCLRRRYGKFIATVIFTNDDIIIFNEKNEQDNKNDVSKIKTEIKHEDAVLDNCLKNSNIQNISKDRFSENKMFYENIKTEVKEEGKN…
PY07238	Py	OG4_27865	-	-	hypothetical protein	conserved plasmodium protein	MSFKILRQGNNLNTILGGHELNKINKWVCSKKYINFYFKRHFGVSGSYGYSIFSREKNCDSNVGKNNLHQYEEKPLYNNLIKKKNFYFTKWPGKVSKLGGSYFFGKNYNMGFYHMLIEEEGKIKKDIAIISSCNRHSIQNKTIENKMKDLTCGYSVQIVLSGKGVKCYFENINYTPIRKIYRNNIKQYYNFKNNIKDIKMLEDNPNNDLEKIKNPEDYKNYNNNNYSYRTKKIKKLFVRLGIGTKNIDVTRVLTMHKKYVNIDVDKTGTIINVYGYNKKYVGSVSHRLYKIVKMNVYTMKGGYVYLHKPKQKIPKKK
PY07295	Py	OG4_84476	-	+	hypothetical protein	pb-fam-1 protein	MNKGYIKIIFSLLSMLICMSDNILASEDTPEVSALRKYSLRSKARRNAALRKLIPHNISPYELYEQNIHLLCTKSKEIKKATKLMDEAVTFLQKYATITRNFCLYNRFENDVFLYFSKYSNPDVGKLEFKIPVPDAYEDIINLLWNPNGIHNFCSDFVSGKFVRVYDPSLAIMQHRYINNAQSTQGYVYFLAKKVDVSEDKXIIAMASANINDRNPSNKKYKNEIVKSANSFKIDIDSEDDIRNGNLIKMFINLSGFVIKKEDTHIDITHIDSIECNCPNVPWWYIQRAKAIKMLDFSKLQQLFDAE
PY07307	Py	OG4_54960	-	+	hypothetical protein	sporozoite microneme protein	MKISITILVLFIILKCVLSFNLSIEPKGNNITLDKHIKKESNIDHSKNQIIEEFDKISDDFSDDINTTKQTIKDLFLDIEGSFEDTSDDVVKL
PY07313	Py	OG4_11162	-	-	transcription factor iiib 70 kDa subunit	transcription factor iiib	MCYIPLTMSLVCKNCQSSDIETNEGQGEIICLRCGSVLEENKIVESLEFVENNNGAISMVGQFIPSSGTKSFMLSWGIRESREISLQKGYINIQKIADNLHLSNQHIEAAQRIYLMALQRNFTMGRNNSYVAASCLYTICRREKSPIMLIDFSDILQTPVKPLGKTFLKLLRLLHISVPNIDPSLFLERFAYKLNLKNDIYKVTYTGIKLIQAMTRDWISTGRRPTGLCGASLLIATRIHGINVNSNTIAEVVRISNPTIIKRLYEFKNTNIAKIKASEFDKISIEDIPSSSIPPCVISDNKKKNKYNLLQKNKTLSLCGSEEQYALCSNSTCSVENYEKNKELQNDNISSYSDNNSTKYIRDQDSNQNKFFNSTQNSIINSSNEVECCISTITPSSSS…
PY07345	Py	OG4_34331	-	+	hypothetical protein	hypothetical protein [Plasmodium yoelii yoelii 17XNL]	MKYEILFILCNLFLYFQKGWGMYLNNNSFLNKKKIVSLFDYGNSIKKNEDNNLIQKRYILGLINSYKGIDGNSKNEKKLSKKKNRLFFLQNNIDSVNRGKTNGSLFYQNNKEIKKMNKNRKIGNNNNNKNVLYAENYKINLTEKPIIEQVPRNVKGRINEWIPEFEENNTLGFFPILLEEMSNEPSPLQIGFEDYMQFNGENVEEIFKNMTREVKINNEPKKIFGMCFFNHKTGALAPLAVYAEIKDVTKVGNNLAVKGLVRGRVIIDEIINQEPCILGKILPIEDKKGLVDTEESLKIVDEIIRIHGQCTTMESHLMEQLDQSFASMNIKLRNDLKESIDAKLEKFQIDPSDVEQKQAFIQIASFAAFDFHLMIVDRYDALMLQNSEDRLRLVRDKIR…
PY07365	Py	OG4_11909	+	-	hypothetical protein	apoptosis-regulating basic	MSKFKLFFQNVRKNAFNIMFWAPLANWGFVIAGCNDLKKNPMYVSEKMTSVLVVYSLLFMRYSLAIKPKNYLLFTCHATNTLVQSTLLFRKLKYDSDNKLMLATN
PY07384	Py	OG4_11174	+	-	Initiation factor 2 subunit family, putative	translation initiation factor eif-2b alpha	MTDCENSKNDDSPEEHEVVRSFKKHYFEDKDPMHIAAIKSLESSLKSSNTKTNFEYFMKLNEAKSQLNNYIKNENVKNQIILTPHSKRMTIYTIVTACDIYHHFAVKKYTHNENNFDDLKSISSKCASEFPKTLQNSLDMIAKNSCTLFGSGKTKILTYSSSDCVKALLLNVAKNKKIKICVYFTCPENCNNNNYLEKDKFFDNKFINDLKNENIDVIKINIQEIQNIFEIIDFVIIGTELVIDNGGIITKKGIKLISELCLLNKKELFVLCEAYKFLKIKTIQNYDEHFYYYCTKNIANKNNFLYEFVPHNFITLFYTDIGIFPPSTISFELNKLYINDIN
PY07467	Py	OG4_48456	-	+	hypothetical protein	conserved plasmodium protein	MIRIKIILLFICAYSFLNISGSVKIQNNDALYNCSSVLCSYDKLSNIHENSKAILTELENILFDVRDEKNVHQSENEYNKRLDLEIKFPEKDDYDDSLYLSSDQDYENEMSYMNPVPYIIINSMDADDLERSILNDDINELDNSEEISLANEEDIDIAFSKIHRV
PY07611	Py	OG4_42862	-	+	hypothetical protein	hypothetical protein [Plasmodium yoelii yoelii 17XNL]	MNTILFVFFSYLPLILFGVCSISLNKISFDEEIKEYLNRFLILRNSQNYCEGKNLLLAPNFGKHNNLSKVLDICDYKKTCDYISYSDKRILRNSIFYEDDKEVENTGANWICSGFEKTTAYKNTRI
PY07622	Py	OG4_24998	-	+	hypothetical protein	transporter protein	MWLKLILAIVILIECIVVIYLPSHIESRIINKKKHKIFNMENFENVASGAILALAFIHMLPEVITLLNKNNLTIYCCFGLILISVTFLNITDILYDHHIENCSDIDNAENKNTNKFTINSTSDQNNTRDHIDIEMKPISVKENTNLSNNFIFDTFKSNAFFIVLSLFIHSFVEGLLIGSLKDKNPIIIVGLSMIAHKWAECLMIYKN

## Sheet: Planilha2
						Função	esperada
PVX_111575	OG4_13559	-	-	4-hydroxy-3-methylbut-2-en-1-yl diphosphate synthase (GcpE), putative	4-hydroxy-3-methylbut-2-en-1-yl diphosphate synthase	Igual	sim
PVX_097655	OG4_13743	-	-	50S ribosomal subunit protein L28, putative	50s ribosomal subunit protein l28	Igual	sim	só plasmodium de roedores	Verdadeiros mistos
PVX_101405	OG4_33220	-	-	hypothetical protein, conserved	conserved plasmodium membrane protein	Dif	não
PVX_002935	OG4_54817	-	-	hypothetical protein, conserved	conserved plasmodium protein
PVX_091035	OG4_27482	-	-	hypothetical protein, conserved	conserved plasmodium protein
PVX_101270	OG4_42827	-	-	hypothetical protein, conserved	conserved plasmodium protein
PVX_111405	OG4_54914	-	-	hypothetical protein, conserved	conserved plasmodium protein
PVX_101450	OG4_10442	-	-	coronin, putative	coronin	Igual	sim
PVX_089020	OG4_54936	-	-	hypothetical protein, conserved	hypothetical protein [Plasmodium vivax SaI-1]
PVX_096330	OG4_27876	-	-	hypothetical protein, conserved	hypothetical protein [Plasmodium vivax SaI-1]
PVX_099090	OG4_48490	-	-	hypothetical protein, conserved	hypothetical protein [Plasmodium vivax SaI-1]
PVX_113815	OG4_54908	-	-	hypothetical protein, conserved	hypothetical protein [Plasmodium vivax SaI-1]
PVX_114030	OG4_41528	-	-	hypothetical protein, conserved	hypothetical protein [Plasmodium vivax SaI-1]
PVX_114535	OG4_47215	-	-	hypothetical protein, conserved	hypothetical protein [Plasmodium vivax SaI-1]
PVX_099745	OG4_16216	-	-	transporter, putative	membrane transporter	Igual	não
PVX_114465	OG4_45892	-	-	troponin c-like protein, putative	myosin light	Igual	sim
PVX_083205	OG4_10575	-	-	protein transport protein Sec61 alpha subunit (Pfsec61), putative	protein transport protein sec61 alpha subunit	Igual	não	145 espécies só 29 tem SP, transmembrana
PVX_092940	OG4_11652	-	-	hypothetical protein	protein yipf6-like	Dif		91/95 negativas
PVX_117120	OG4_44098	-	-	rhoptry protein, putative	rhoptry protein	Igual	não
PVX_094870	OG4_47305	-	-	hypothetical protein, conserved	ring finger	Dif	sim	proteins para degradação
PVX_097920	OG4_43900	-	-	subtilisin-like serine protease, putative	serine protease belonging to subtilisin	Igual	sim
PVX_123920	OG4_10560	-	-	ubiquitin-activating enzyme e1, putative	ubiquitin-activating enzyme	Igual	sim
PVX_122590	OG4_23238	-	-	WD domain, G-beta repeat domain containing protein	wd g-beta repeat domain containing protein	Igual	sim
PVX_088155	OG4_16894	-	+	DegP-like serine protease 1 precursor, putative	-like serine protease 1 precursor	Igual	sim	associada a membrana
PVX_117410	OG4_36474	-	+	30S ribosomal protein S10, putative	30s ribosomal protein s10	Igual	apicoplasto	8 PROTEIN (teileria, babesia), só Pv não tem
PVX_090990	OG4_34338	-	+	hypothetical protein, conserved	5 -3 exoribonuclease	Dif	mitocondrial	Mitocondrial em T. brucei (Zimmer et al. 2011)
PVX_089650	OG4_34112	-	+	ribosomal protein l10, putative	50s ribosomal protein l10	Igual	apicoplasto	9 protein 2 sem SP (Py e PV)
PVX_092755	OG4_11597	-	+	hypothetical protein, conserved	abhydrolase domain-containing protein 11	DIF		80/97 negativa, roedores não tem SP
PVX_115190	OG4_10136	-	+	oxidoreductase, aldo/keto reductase domain containing protein	aldo-keto reductase	Igual		pode estar presente num canal de potássio
PVX_090075	OG4_54213	-	+	hypothetical protein, conserved	apical merozoite protein	DIF	sim	a maioria das proteínas do complexo apical seguem a via classica de transporte através de SP (Kats et al. 2007)
PVX_082560	OG4_12949	-	+	apurinic/apyrimidinic endonuclease Apn1, putative	apurinic apyrimidinic endonuclease apn1	Igual	não	altamente conservada via de reparo de DNA por excição de base, pode estar na mitocondria http://www.yeastgenome.org/cgi-bin/locus.fpl?locus=APN1
PVX_085185	OG4_48015	-	+	hypothetical protein, conserved	arabidopsis thaliana brahma ortholog	DIF		ATPase de remodelamento de cromatina
PVX_098040	OG4_44547	-	+	asparagine-t RNA ligase, putative	asparaginyl-trna synthetase	DIF
PVX_001805	OG4_38616	-	+	hypothetical protein, conserved	conserved plasmodium protein
PVX_001910	OG4_27903	-	+	hypothetical protein, conserved	conserved plasmodium protein
PVX_092420	OG4_41271	-	+	hypothetical protein, conserved	conserved plasmodium protein
PVX_094490	OG4_30632	-	+	hypothetical protein, conserved	conserved plasmodium protein
PVX_094925	OG4_23369	-	+	hypothetical protein, conserved	conserved plasmodium protein
PVX_100770	OG4_44949	-	+	hypothetical protein, conserved	conserved plasmodium protein
PVX_111130	OG4_48144	-	+	hypothetical protein, conserved	conserved plasmodium protein
PVX_111240	OG4_48350	-	+	hypothetical protein, conserved	conserved plasmodium protein
PVX_123425	OG4_64957	-	+	hypothetical protein, conserved	conserved plasmodium protein
PVX_123725	OG4_27833	-	+	hypothetical protein, conserved	conserved plasmodium protein
PVX_123925	OG4_45842	-	+	hypothetical protein, conserved	conserved plasmodium protein
PVX_084415	OG4_34333	-	+	RNA binding protein, putative	conserved plasmodium protein	DIF
PVX_090855	OG4_54820	-	+	hypothetical protein, conserved	cpw-wpc family protein	DIF	sim	possivel antigeno de superfície de gametócito (Sutherland et al. 2009)
PVX_115165	OG4_84674	-	+	hypothetical protein, conserved	cysteine-rich surface protein	DIF
PVX_123795	OG4_12828	-	+	DNA GyrAse a-subunit, putative	dna gyrase a subunit	Igual	apicoplasto	Dar MA et al. 2007 - apicoplasto de pf
PVX_100925	OG4_12159	-	+	DNA gyrase subunit b, putative	dna gyrase subunit b	Igual	apicoplasto
PVX_092685	OG4_10812	-	+	dolichyl-phosphate b-D-mannosyltransferase, putative	dolichol-phosphate mannosyltransferase	Igual	sim	Dolichol-phosphate mannose (Dol-P-Man) serves as a donor of mannosyl residues on the lumenal side of the endoplasmic reticulum(ER) (Maeda et al. 2001)
PVX_116865	OG4_24474	-	+	hypothetical protein, conserved	dual specificity protein	DIF
PVX_091840	OG4_10672	-	+	pyruvate dehydrogenase E1 component, alpha subunit, putative	e1 component	Igual	apicoplasto	Forth et al. 2005
PVX_095275	OG4_13269	-	+	endonuclease/exonuclease/phosphatase domain containing protein	endonuclease exonuclease phosphatase family protein	Igual
PVX_001780	OG4_23359	-	+	hypothetical protein, conserved	erythrocyte membrane-associated antigen	DIF	sim
PVX_079740	OG4_41653	-	+	hypothetical protein, conserved	extracellular membrane associated protein with a signal an egf domain followed by 10 transmembrane domains	DIF	sim
PVX_122725	OG4_14702	-	+	ferredoxin, putative	ferredoxin	IGUAL	apicoplasto	vollmer et al,2001
PVX_000975	OG4_29314	-	+	hypothetical protein, conserved	fimbriae-associated protein fap1	DIF	sim	secretada em bacterias (wu et al. 1999, 1998)
PVX_089895	OG4_10803	-	+	glutamyl-tRNA(Gln) amidotransferase subunit A, putative	glutamyl-trna amidotransferase subunit a	Igual	apicoplasto	bhatt et al 2009
PVX_122730	OG4_21019	-	+	glycerol-3-phosphate acyltransferase, putative	glycerol-3-phosphate acyltransferase	Igual	ER	Santiago et al. 2003
PVX_086115	OG4_30613	-	+	glycerophosphoryl diester phosphodiesterase, putative	glycerophosphoryl diester phosphodiesterase	IGUAL
PVX_082475	OG4_12526	-	+	hypothetical protein, conserved	gpi transamidase subunit pig-	DIF	ER	Delorenzi et al. 2002
PVX_123540	OG4_12090	-	+	GTP-binding protein, putative	gtp-binding protein	IGUAL		trafico vesicular proteinas (jambou et al,. 1996)
PVX_097890	OG4_13519	-	+	histone deacetylase, putative	histone deacetylase family protein	IGUAL
PVX_084315	OG4_43617	-	+	glyoxalase II, putative	hydroxyacyl glutathione hydrolase	IGUAL
PVX_082765	OG4_48442	-	+	hypothetical protein	hypothetical protein [Plasmodium vivax SaI-1]
PVX_000745	OG4_42735	-	+	hypothetical protein, conserved	hypothetical protein [Plasmodium vivax SaI-1]
PVX_081370	OG4_37696	-	+	hypothetical protein, conserved	hypothetical protein [Plasmodium vivax SaI-1]
PVX_082860	OG4_34299	-	+	hypothetical protein, conserved	hypothetical protein [Plasmodium vivax SaI-1]
PVX_084845	OG4_41452	-	+	hypothetical protein, conserved	hypothetical protein [Plasmodium vivax SaI-1]
PVX_085520	OG4_37510	-	+	hypothetical protein, conserved	hypothetical protein [Plasmodium vivax SaI-1]
PVX_088975	OG4_27548	-	+	hypothetical protein, conserved	hypothetical protein [Plasmodium vivax SaI-1]
PVX_089360	OG4_48163	-	+	hypothetical protein, conserved	hypothetical protein [Plasmodium vivax SaI-1]
PVX_090180	OG4_38540	-	+	hypothetical protein, conserved	hypothetical protein [Plasmodium vivax SaI-1]
PVX_090205	OG4_48425	-	+	hypothetical protein, conserved	hypothetical protein [Plasmodium vivax SaI-1]
PVX_097830	OG4_27871	-	+	hypothetical protein, conserved	hypothetical protein [Plasmodium vivax SaI-1]
PVX_097845	OG4_53798	-	+	hypothetical protein, conserved	hypothetical protein [Plasmodium vivax SaI-1]
PVX_099430	OG4_54834	-	+	hypothetical protein, conserved	hypothetical protein [Plasmodium vivax SaI-1]
PVX_113280	OG4_48376	-	+	hypothetical protein, conserved	hypothetical protein [Plasmodium vivax SaI-1]
PVX_113955	OG4_34486	-	+	hypothetical protein, conserved	hypothetical protein [Plasmodium vivax SaI-1]
PVX_114170	OG4_36522	-	+	hypothetical protein, conserved	hypothetical protein [Plasmodium vivax SaI-1]
PVX_114215	OG4_48315	-	+	hypothetical protein, conserved	hypothetical protein [Plasmodium vivax SaI-1]
PVX_119790	OG4_42822	-	+	hypothetical protein, conserved	hypothetical protein [Plasmodium vivax SaI-1]
PVX_079795	OG4_27861	-	+	hypothetical protein, conserved	hypothetical protein, conserved in Plasmodium species [Plasmodium knowlesi strain H]
PVX_081640	OG4_54909	-	+	hypothetical protein, conserved	hypothetical protein, conserved in Plasmodium species [Plasmodium knowlesi strain H]
PVX_082445	OG4_48337	-	+	hypothetical protein, conserved	hypothetical protein, conserved in Plasmodium species [Plasmodium knowlesi strain H]
PVX_099020	OG4_48101	-	+	hypothetical protein, conserved	hypothetical protein, conserved in Plasmodium species [Plasmodium knowlesi strain H]
PVX_110955	OG4_76722	-	+	hypothetical protein, conserved	hypothetical protein, conserved in Plasmodium species [Plasmodium knowlesi strain H]
PVX_099965	OG4_37940	-	+	hypothetical protein, conserved	leucine-rich repeat protein lrr8	DIF
PVX_088945	OG4_11105	-	+	leucyl-tRNA synthetase, putative	leucyl-trna synthetase	IGUAL
PVX_089395	OG4_48129	-	+	MAC/Perforin domain containing protein	mac perforin domain containing protein	Igual
PVX_122435	OG4_11305	-	+	malonyl CoA-acyl carrier protein transacylase precursor, putative	malonyl -acyl carrier protein transacylase precursor	Igual
PVX_099140	OG4_10811	-	+	Met-10+ domain containing protein	met-10+ like	Igual
PVX_093540	OG4_37649	-	+	methionine aminopeptidase, putative	methionine aminopeptidase	Igual
PVX_094445	OG4_47490	-	+	tRNA ligase, putative	methionyl-trna synthetase
PVX_086165	OG4_34342	-	+	hypothetical protein, conserved	mismatch repair protein	DIF
PVX_091435	OG4_21586	-	+	hypothetical protein, conserved	moving junction protein	DIF
PVX_088200	OG4_30703	-	+	hypothetical protein, conserved	myeloid lymphoid or mixed-lineage leukemia 4- partial	DIF
PVX_095415	OG4_45895	-	+	hypothetical protein, conserved	nuclear movement protein	DIF
PVX_000800	OG4_41741	-	+	hypothetical protein, conserved	o-sialoglycoprotein endopeptidase	DIF
PVX_119785	OG4_48107	-	+	hypothetical protein, conserved	pb-fam-2 protein	DIF
PVX_098840	OG4_11632	-	+	formylmethionine deformylase, putative	peptide deformylase	Igual
PVX_113780	OG4_48231	-	+	hypothetical protein, conserved	pfs45-48 related	DIF
PVX_001710	OG4_118796	-	+	Phist protein (Pf-fam-b)	phist protein (pf-fam-b)	Igual
PVX_082960	OG4_10180	-	+	phosphate transporter, putative	phosphate transporter	IGUAL
PVX_114565	OG4_11521	-	+	phosphatidylcholine-sterol acyltransferase precursor, putative	phosphatidylcholine-sterol acyltransferase	IGUAL
PVX_096015	OG4_48450	-	+	hypothetical protein	plasmodium exported protein	DIF
PVX_084510	OG4_10837	-	+	porphobilinogen deaminase, putative	porphobilinogen deaminase	IGUAL
PVX_091655	OG4_10408	-	+	tRNA nucleotidyltransferase, putative	potential trna cca-pyrophosphorylase
PVX_099680	OG4_11662	-	+	prolyl-t-RNA synthase, putative	prolyl-trna synthetase	IGUAL
PVX_082880	OG4_22103	-	+	protein kinase, putative	protein kinase	Igual
PVX_002580	OG4_11573	-	+	pseudouridine synthetase, putative	pseudouridine synthase	Igual
PVX_089765	OG4_118788	-	+	RAD protein (Pv-fam-e)	rad protein (pv-fam-e)	Igual
PVX_116930	OG4_42805	-	+	reticulocyte binding protein 2 homolog B, putative	reticulocyte binding protein 2 homolog	Igual
PVX_111015	OG4_10825	-	+	50S ribosomal protein L27, putative	ribosomal protein l27	Igual		98/125 proteinas sem SP (apicomplexa - toxop.
PVX_000715	OG4_23773	-	+	hypothetical protein, conserved	ribosome biogenesis gtp-binding protein	DIF
PVX_083490	OG4_34082	-	+	hypothetical protein, conserved	ribosome biogenesis gtpase	DIF
PVX_002625	OG4_11835	-	+	rRNA methylase, putative	rrna methylase	Igual
PVX_084105	OG4_54789	-	+	serine/threonine-protein kinase Nek1, putative	serine threonine-protein kinase	Igual
PVX_083025	OG4_54960	-	+	sporozoite microneme protein, putative	sporozoite microneme protein	Igual
PVX_118475	OG4_19172	-	+	metalloendopeptidase, putative	stromal processing peptidase	DIF
PVX_089230	OG4_47482	-	+	hypothetical protein, conserved	thrombospondin type 1 domain-containing protein	DIF
PVX_117015	OG4_14117	-	+	translation initiation factor EF-1, putative	translation initiation factor if-1	Igual
PVX_089095	OG4_12019	-	+	translation initiation factor IF-3, putative	translation initiation factor if-3	IGUAL
PVX_114977	OG4_11916	-	+	hypothetical protein	transmembrane protein 111-like	DIF
PVX_092880	OG4_35952	-	+	ABC transporter, putative	transport protein	IGUAL
PVX_001855	OG4_10833	-	+	tRNA methyl transferase, putative	trna methyl transferase	IGUAL
PVX_101100	OG4_11154	-	+	glucose inhibited division protein A homologue, putative	trna uridine 5-carboxymethylaminomethyl modification enzyme
PVX_094305	OG4_49679	-	+	tryptophan-rich antigen	tryptophan-rich antigen 74
PVX_115215	OG4_29702	+	-	50S ribosomal protein L17, putative	30s ribosomal protein s17
PVX_081500	OG4_11290	+	-	hypothetical protein, conserved	adenylyl cyclase associated protein	dif
PVX_087975	OG4_10853	+	-	cloroquine resistance associated protein Cg3, putative	cg3 protein	Igual
PVX_092530	OG4_14813	+	-	hypothetical protein, conserved	conserved plasmodium membrane protein	dif
PVX_094425	OG4_41739	+	-	hypothetical protein, conserved	conserved plasmodium membrane protein	dif
PVX_111440	OG4_34263	+	-	hypothetical protein, conserved	conserved plasmodium membrane protein	dif
PVX_081665	OG4_10425	+	-	cysteine desulfurase, mitochondrial precursor, putative	cysteine desulfurase	Igual
PVX_118150	OG4_16178	+	-	hypothetical protein, conserved	glutamine cyclotransferase	dif
PVX_092020	OG4_64938	+	-	hypothetical protein	hypothetical protein [Plasmodium vivax SaI-1]
PVX_080055	OG4_30692	+	-	hypothetical protein, conserved	hypothetical protein [Plasmodium vivax SaI-1]
PVX_114780	OG4_54946	+	-	hypothetical protein, conserved	hypothetical protein [Plasmodium vivax SaI-1]
PVX_116975	OG4_54958	+	-	hypothetical protein, conserved	hypothetical protein, conserved in Plasmodium species [Plasmodium knowlesi strain H]
PVX_089080	OG4_39922	+	-	hypothetical protein, conserved	origin recognition complex 1	dif
PVX_097005	OG4_118767	+	-	hypothetical protein, conserved	plasmodium exported protein	dif
PVX_092365	OG4_17760	+	-	protein phosphatase 2C domain containing protein	protein phosphatase	Igual
PVX_089930	OG4_10790	+	-	small GTP-binding protein sar1, putative	small gtp-binding protein	Igual
PVX_114325	OG4_45974	+	-	hypothetical protein, conserved	splicing arginine serine-rich	dif
PVX_082955	OG4_11909	+	+	hypothetical protein, conserved	apoptosis-regulating basic	dif
PVX_122865	OG4_41949	+	+	hypothetical protein, conserved	camk family protein kinase	dif
PVX_094670	OG4_54858	+	+	hypothetical protein, conserved	conserved plasmodium membrane protein	dif
PVX_094310	OG4_47529	+	+	hypothetical protein, conserved	conserved plasmodium protein
PVX_094815	OG4_34337	+	+	hypothetical protein, conserved	conserved plasmodium protein
PVX_094905	OG4_25065	+	+	hypothetical protein, conserved	conserved plasmodium protein
PVX_122045	OG4_10845	+	+	DNA ligase 1 precursor, putative	dna ligase 1	Igual
PVX_099490	OG4_19709	+	+	hypothetical protein, conserved	fe-s-cluster redox	dif
PVX_117270	OG4_22398	+	+	hypothetical protein, conserved	hypothetical membrane conserved in plasmodium species
PVX_083275	OG4_42862	+	+	hypothetical protein	hypothetical protein [Plasmodium vivax SaI-1]
PVX_114250	OG4_48413	+	+	hypothetical protein, conserved	hypothetical protein [Plasmodium vivax SaI-1]
PVX_116500	OG4_15045	+	+	hypothetical protein, conserved	nicotinate-nucleotide adenylyltransferase	dif
PVX_117660	OG4_48162	+	+	serine hydroxymethyltransferase, putative	serine hydroxymethyltransferase	Igual
PVX_087715	OG4_24014	+	+	hypothetical protein, conserved	trna-splicing endonuclease + effector	dif
